# Supplementary material
Source: PubMed Central journal article supplement (PMC6097902)
Supplement: NIHMS972147-supplement-supp.pdf [file NIHMS972147-supplement-supp.pdf]

## Supporting Information

### **Facile Chemoenzymatic Synthesis of O-Mannosyl Glycans**

*Shuaishuai Wang<sup>+</sup>, Qing Zhang<sup>+</sup>, CongCong Chen, Yuxi Guo, Madhusudhan Reddy Gadi, Jin Yu, Ulrika Westerlind, Yunpeng Liu, Xuefeng Cao, Peng G. Wang,\* and Lei Li\**

anie\_201803536\_sm\_miscellaneous\_information.pdf

# Supporting Information

## Table of Contents

|                                                                           |     |
|---------------------------------------------------------------------------|-----|
| <b>I. Chemical Synthesis</b> .....                                        | 2   |
| <b>II. Enzymatic Extensions</b> .....                                     | 14  |
| <b>III. Glycan Microarray preparation, assay and data</b> .....           | 18  |
| <b>IV. HPLC, MS and NMR analysis of purified O-mannosyl glycans</b> ..... | 21  |
| <b>V. NMR spectra</b> .....                                               | 66  |
| <b>VI. Reference</b> .....                                                | 103 |
| <b>VII. Microarray Data</b> .....                                         | 104 |

## I. Chemical Synthesis

### Materials:

All chemicals were purchased as reagent grade and used without further purification. Anhydrous dichloromethane (CH<sub>2</sub>Cl<sub>2</sub>), acetonitrile (CH<sub>3</sub>CN), tetrahydrofuran (THF), *N,N*-dimethyl formamide (DMF), diethyl ether (Et<sub>2</sub>O), toluene, and methanol (MeOH) were purchased from a commercial source without further distillation. Pulverized Molecular Sieves MS-4 Å (Aldrich) for glycosylation was activated by heating at 350 °C for 3 h. Reactions were monitored by analytical thin-layer chromatography (TLC) in EM silica gel 60 F254 plates and visualized under UV (254 nm) and/or by staining with acidic ceric ammonium molybdate or *p*-anisadehyde. Flash chromatography was performed on silica gel (Merck) of 40-63µm particle size and P2 gel (Biorad). <sup>1</sup>H and <sup>13</sup>C NMR spectra were recorded on a Bruker AVANCE 400 (400 MHz), and Bruker AVANCE 600 (600 MHz) spectrometer at 25 °C. All <sup>1</sup>H Chemical shifts (in ppm) were assigned according to CDCl<sub>3</sub> (δ= 7.24 ppm) and D<sub>2</sub>O (δ = 4.79 ppm) and all <sup>13</sup>C NMR was calibrated with CDCl<sub>3</sub> (δ = 77.00 ppm). Coupling constants (*J*) are reported in hertz (Hz). Splitting patterns are described using the following abbreviations: s, singlet; brs, broad singlet; d, doublet; t, triplet; q, quartet; dd, doublet of doublet; m, multiplet. <sup>1</sup>H NMR spectra are reported in the following order: chemical shift, multiplicity, coupling constant(s), and number(s) of protons. All NMR signals were assigned on the basis of <sup>1</sup>H NMR, COSY, HSQC, HMQC, and <sup>13</sup>C NMR experiments. HPLC-MS experiments were performed on an LTQ-Orbitrap Elite mass spectrometer (Thermo Fisher) equipped with EASY-spray source and nano-LC UltiMate 3000 high-performance liquid chromatography system (Thermo Fisher). Samples were transmitted into MS with a silica column. LTQ-Orbitrap Elite mass spectrometer was operated in the data-dependent mode. A full-scan survey MS experiment (*m/z* range was set according to the molecular weight of O-mannose glycan; automatic gain control target, 1,000,000 ions; resolution at 400 *m/z*, 240,000; maximum ion accumulation time, 200 ms) was acquired by the Orbitrap mass spectrometer. MALDI-TOF MS analyses were performed on UltrafleXtreme MALDI TOF/TOF Mass Spectrometer (Bruker). Scan range of MS was set according to the molecular weight of O-mannose glycans, and reflector mode was used for O-mannose glycan analysis. Mass spectra were obtained in both positive and negative extraction mode with the following voltage settings: ion source 1 (19.0 kV), ion source 2 (15.9 kV), and lens (9.3 kV). The reflector voltage was set to 20 kV. The laser was pulsed at 7 Hz and the pulsed ion extraction time was set at 400 ns. The laser power was kept in the range of 40–90%. Fmoc-Thr(OH)-*O**t*Bu (**4**) was purchased from Sigma-Aldrich.

### General Procedures

#### A) Glycosylation of *N*-phenyltrifluoroacetimidate donor

A mixture of donor (1.2 mmol), acceptor (1 mmol) and 4 Å molecular sieves in dry CH<sub>2</sub>Cl<sub>2</sub> was stirred at room temperature under argon for 1 h. TMSOTf (0.2 mmol) was added at -60 °C. The reaction mixture was stirred at -60 °C for 1 h before it was quenched with a few drops of triethylamine. The resulting mixture was filtered. The filtrate was concentrated *in vacuo* and purified on a silica gel column to produce the product.

#### B) Glycosylation of thioether donor procedure

A mixture of thioether donor (1 mmol), amino acid acceptor **4** (1.5-2 mmol) and 4 Å molecular sieves in dry Et<sub>2</sub>O/CH<sub>2</sub>Cl<sub>2</sub> (1:1, v/v) were stirred at room temperature under argon for 1 h. NIS (1.5 mmol) and AgOTf (0.2 mmol) were added at 0 °C. The reaction mixture was stirred for 10 h before it was quenched with a few drops of triethylamine. The resulting mixture was filtered. The filtrate was diluted with CH<sub>2</sub>Cl<sub>2</sub> and washed with 5% aqueous Na<sub>2</sub>S<sub>2</sub>O<sub>3</sub>, saturated aqueous NaHCO<sub>3</sub>, brine, dried over Na<sub>2</sub>SO<sub>4</sub>, and concentrated *in vacuo*. The residue was purified on a silica gel column to produce the product.

### C) Global deprotection of Ac and *t*Bu and reintroducing of Fmoc

Oligosaccharide glycosyl amino acid derivative (1 mmol) was dissolved in TFA/CH<sub>2</sub>Cl<sub>2</sub> (1:1, v/v) and stirred at room temperature under argon for 4 h. The mixture was concentrated *in vacuo* and the residue was dissolved in MeOH, and NaOMe in MeOH was added until pH was 10. After stirring at room temperature for 2 h, the solution was neutralized with ion-exchange resin (H<sup>+</sup>), then filtered and concentrated *in vacuo*. The crude product, NaHCO<sub>3</sub> (4 mmol) and 9-fluorenylmethyl-Nsuccinimidylcarbonate (3 mmol) were dissolved in H<sub>2</sub>O/acetone (1:1, v/v) and this mixture was stirred at room temperature. After 2 h, the mixture was concentrated *in vacuo* and purified on a silica gel column to afford the product.

### D) Transformation of PMB to Ac and cleavage of benzylidene

A solution of oligosaccharide (1 mmol) in a mixture of CH<sub>2</sub>Cl<sub>2</sub>/H<sub>2</sub>O (30:1, v/v) was treated with DDQ (1.2 mmol) in ice bath and stirred at 25 °C for 3 h. Triethylamine was added and the solvent was removed *in vacuo*. The residue was dissolved in CH<sub>2</sub>Cl<sub>2</sub> was cooled down to 0 °C, followed by slow addition of acetic anhydride (3 mmol) and TEA (5 mmol). The reaction mixture was stirred at room temperature overnight and concentrated *in vacuo*. The crude product was dissolved in anhydrous MeOH, followed by addition of TsOH (0.1 mmol) and EtSH (6 mmol). The reaction mixture was stirred at rt. for 6 h and then quenched with triethylamine and concentrated *in vacuo*. The mixture was purified with silica column to get the product.

### E) Transformation of NHTroc to NHAc

N-Troc protected oligosaccharide (1 mmol) was dissolved in AcOH at room temperature, followed by addition of Zn dust (<10 micron, 10 mmol). After being stirred at 40 °C for 24 h, the mixture was concentrated *in vacuo* to give a residue for the next step without further purification. To a solution of the residue in pyridine was added Ac<sub>2</sub>O. After being stirred at room temperature for 12 h, the solution was diluted with ethyl acetate and washed with aqueous HCl (1 M), saturated aqueous NaHCO<sub>3</sub>, and brine solution. The organic layer was dried over Na<sub>2</sub>SO<sub>4</sub>, filtered, and concentrated *in vacuo* to give a residue, which was purified by silica gel column chromatography to generate NHAc containing compound.

### Preparation of the versatile precursor **1**.

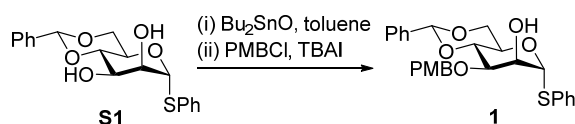

Compound **S1**<sup>[1]</sup> (13.40 g, 37.2 mmol), dibutyltin oxide (10.23 g, 40.9 mmol) and toluene (250 mL) were refluxed for 3 h, followed by concentration *in vacuo*. The residue,

tetrabutylammonium iodide (15.09 g, 40.9 mmol), 4-Methoxybenzyl chloride (6.39 mL, 40.9 mmol), and toluene (250 mL) were stirred at 70 °C overnight. Toluene was removed by concentration *in vacuo* and the residue was diluted with ethyl acetate (300 mL). The resulting solution was washed with water and saturated aqueous NaHCO<sub>3</sub>, dried over Na<sub>2</sub>SO<sub>4</sub>, filtered, and concentrated *in vacuo*. The resulting residue was purified by silica gel column chromatography (hexane/ethyl acetate, 4:1, v/v) to afford precursor **1** (16.26 g, 91%) as white foams. *R*<sub>f</sub> = 0.28 (hexane/ethyl acetate, 4:1, v/v); <sup>1</sup>H NMR (400 MHz, CDCl<sub>3</sub>) δ 7.51 (dd, *J* = 7.6, 1.8 Hz, 2H), 7.46 – 7.34 (m, 5H), 7.35 – 7.25 (m, 5H), 6.88 (d, *J* = 8.7 Hz, 2H), 5.61 (s, 1H), 5.57 (s, 1H), 4.81 (d, *J* = 11.4 Hz, 1H), 4.66 (d, *J* = 11.4 Hz, 1H), 4.33 (td, *J* = 9.8, 4.9 Hz, 1H), 4.25 – 4.11 (m, 3H), 3.93 (dd, *J* = 9.5, 3.4 Hz, 1H), 3.84 (t, *J* = 10.3 Hz, 1H), 3.80 (s, 3H), 2.95 (d, *J* = 1.2 Hz, 1H); <sup>13</sup>C NMR (100 MHz, CDCl<sub>3</sub>) δ 159.47, 137.42, 133.27, 131.65, 129.74, 129.61, 129.10, 128.94, 128.20, 127.63, 126.05, 113.90, 101.57, 87.76, 78.92, 75.35, 72.87, 71.32, 68.48, 64.57, 55.23; MALDI-MS: [M+Na]<sup>+</sup> C<sub>27</sub>H<sub>28</sub>O<sub>6</sub>SNa calculated for 503.1504, found 503.1515.

### Preparation of N-phenyltrifluoroacetimidate donor **2**.

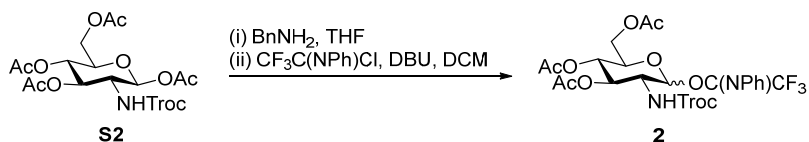

Compound **S2** (5.70 g, 10.9 mmol) was dissolved in THF (100 mL) followed by the addition of benzylamine (2.10 mL, 19.6 mmol). After the reaction mixture was stirred at room temperature for 8 h under dry atmosphere, it was evaporated and the residue was diluted with ethyl acetate and washed successively with 1 M aqueous HCl, saturated aqueous NaHCO<sub>3</sub>, and brine. The organic layer was dried over MgSO<sub>4</sub>, filtrated and concentrated under high vacuum. The crude product was dissolved in CH<sub>2</sub>Cl<sub>2</sub> (200 mL), then 2,2,2-Trifluoro-N-phenylacetimidoyl Chloride (3.42 mL, 21.8 mmol) and 1,8-diazabicyclo-[5,4,0]-7-undecene (2.44 mL, 16.4 mmol) were added at 0 °C under dry atmosphere. After the reaction mixture was stirred at room temperature for 2 h, it was evaporated followed by purification by silica gel column chromatography (hexane/ethyl acetate 4/1) to afford imidate donor **2** (5.50 g, 77% over two steps) as a white foams, which were found unstable and used immediately in the subsequent glycosylation without further characterization.

### Preparation of N-phenyltrifluoroacetimidate donor **3**.

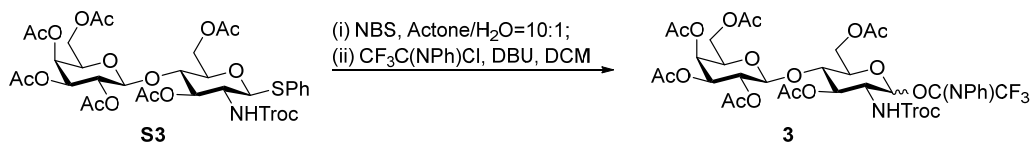

Compound **S3**<sup>[2]</sup> (5.10 g, 5.9 mmol) was dissolved in Actone/H<sub>2</sub>O (10:1, v/v, 60 mL) at -30 °C and N-Bromosuccinimide (5.25 g, 29.5 mmol) was added to the solution. After stirred at -30 °C for 2 h, the reaction was quenched with 5% aqueous Na<sub>2</sub>S<sub>2</sub>O<sub>3</sub> (10 mL) and saturated aqueous NaHCO<sub>3</sub> (10 mL). The mixture was diluted with ethyl acetate and washed with brine. The organic layer was dried over Na<sub>2</sub>SO<sub>4</sub>, filtered, and concentrated. The residue was dissolved in

CH<sub>2</sub>Cl<sub>2</sub> (100 mL), then 2,2,2-Trifluoro-N-phenylacetimidoyl Chloride (1.85 mL, 11.8 mmol) and 1,8-diazabicyclo-[5,4,0]-7-undecene (1.32 mL, 8.9 mmol) were added at 0 °C under dry atmosphere. After the reaction mixture was stirred at room temperature for 2 h, it was evaporated followed by purification by silica gel column chromatography (hexane/acetone 4/1) to afford imidate donor **3** (4.29 g, 75% over two steps) as a white foams, which were found instable and used immediately in the subsequent glycosylation without further characterization.

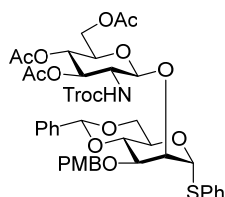

**Phenyl 3,4,6-tri-O-acetyl-2-deoxy-2-(2,2,2-trichloroethoxycarbonylamino)-β-D-glucopyranosyl-(1→2)-4,6-O-benzylidene-3-(4-Methoxybenzyl)-1-thio-α-D-Mannopyranoside (5)**

Compound **1** (3.37 g, 7.0 mmol) was glycosylated with fresh-made donor **2** (5.50 g, 8.43 mmol) by following general procedure **A** to get the desired compound **5** (5.63 g, 85%) as white foam.  $R_f = 0.30$  (hexane/ethyl acetate, 3:1, v/v); <sup>1</sup>H NMR (400 MHz, CDCl<sub>3</sub>) δ 7.60 – 7.49 (m, 2H), 7.49 – 7.37 (m, 5H), 7.37 – 7.30 (m, 5H), 6.94 – 6.84 (m, 2H), 5.64 (s, 1H), 5.54 (dd,  $J = 10.7, 9.3$  Hz, 1H), 5.48 (d,  $J = 1.4$  Hz, 1H), 5.37 – 5.30 (m, 1H), 5.14 – 5.01 (m, 2H), 4.78 (d,  $J = 11.2$  Hz, 1H), 4.74 – 4.63 (m, 2H), 4.52 (d,  $J = 12.5$  Hz, 1H), 4.40 (dd,  $J = 3.3, 1.6$  Hz, 1H), 4.35 – 4.11 (m, 5H), 3.96 (dd,  $J = 9.8, 3.2$  Hz, 1H), 3.88 – 3.78 (m, 4H), 3.77 – 3.70 (m, 1H), 3.44 (dt,  $J = 10.9, 8.1$  Hz, 1H), 2.05 (s, 3H), 2.04 (s, 3H), 2.02 (s, 3H); <sup>13</sup>C NMR (100 MHz, CDCl<sub>3</sub>) δ 170.63, 170.27, 169.58, 159.40, 137.50, 133.42, 131.72, 129.87, 129.66, 129.23, 128.94, 128.25, 127.91, 126.06, 113.87, 101.55, 87.40, 78.75, 76.40, 74.40, 72.49, 72.09, 68.80, 68.49, 65.32, 62.16, 60.42, 55.26, 21.06, 20.71, 20.65, 20.58; MALDI-MS:  $[M+Na]^+$  C<sub>42</sub>H<sub>46</sub>Cl<sub>3</sub>NO<sub>15</sub>SNa calculated for 964.1552, found 964.1538.

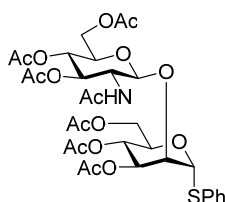

**Phenyl 2-acetamido-3,4,6-tri-O-acetyl-2-deoxy-β-D-glucopyranosyl-(1→2)-3,4,6-tri-O-acetyl-1-thio-α-D-Mannopyranoside (6)**

Compound **5** (2.83 g, 3.0 mmol) was dissolved in TFA/CH<sub>2</sub>Cl<sub>2</sub> (10:1, v/v, 50 mL) and stirred at room temperature under argon for 1 h. CH<sub>2</sub>Cl<sub>2</sub> (100 mL) was added to dilute the reaction and then neutralized with saturated aqueous NaHCO<sub>3</sub>. The organic layer was separated and washed with brine. After dried over anhydrous Na<sub>2</sub>SO<sub>4</sub> and concentrated, the residue was treated by following general procedure **E** to afford compound **6** (1.74 g, 80%) as white foam.  $R_f = 0.30$  (hexane/acetone, 3:1, v/v); <sup>1</sup>H NMR (400 MHz, CDCl<sub>3</sub>) δ 7.58 – 7.42 (m, 2H), 7.41 – 7.24 (m,

3H), 5.73 (d,  $J = 7.9$  Hz, 1H), 5.51 (t,  $J = 9.9$  Hz, 1H), 5.45 (s, 1H), 5.30 (t,  $J = 10.0$  Hz, 1H), 5.12 – 4.95 (m, 2H), 4.53 – 4.41 (m, 2H), 4.33 – 4.20 (m, 2H), 4.11 – 3.97 (m, 2H), 3.72 (dd,  $J = 10.2, 5.1$  Hz, 1H), 3.59 (dt,  $J = 11.5, 8.1$  Hz, 1H), 2.11 – 2.07 (m, 6H), 2.05 (s, 3H), 2.03 (s, 3H), 2.02 – 1.99 (m, 6H), 1.86 (s, 3H);  $^{13}\text{C}$  NMR (100 MHz,  $\text{CDCl}_3$ )  $\delta$  170.78, 170.67, 170.62, 170.50, 170.35, 169.56, 169.51, 133.14, 131.55, 129.18, 127.87, 98.40, 85.07, 75.47, 71.84, 71.47, 70.46, 69.53, 68.83, 66.20, 62.71, 62.05, 55.63, 23.19, 20.75, 20.72, 20.70, 20.67, 20.63;  $[\text{M}+\text{Na}]^+$   $\text{C}_{32}\text{H}_{41}\text{NO}_{16}\text{SNa}$  calculated for 750.2044, found 750.2032.

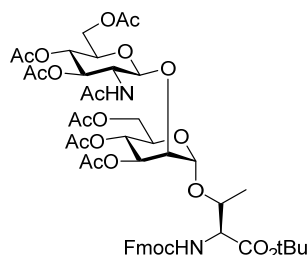

**$N^{\alpha}$ -9-Fluorenylmethyloxycarbonyl-O-[2-acetamido-3,4,6-tri-O-acetyl-2-deoxy- $\beta$ -D-glucopyranosyl-(1 $\rightarrow$ 2)-3,4,6-tri-O-acetyl- $\alpha$ -D-mannopyranosyl]-L-threonine tertbutyl ester (7)**

Compound **6** (1.74 g, 2.4 mmol) was glycosylated with compound **4** (1.43 g, 3.6 mmol) by following general procedure **B** to get the desired compound **7** (2.27 g, 93%) as white foam.  $R_f = 0.29$  (hexane/acetone, 3:1, v/v);  $^1\text{H}$  NMR (400 MHz,  $\text{CDCl}_3$ )  $\delta$  7.78 (d,  $J = 7.4$  Hz, 2H), 7.72 – 7.54 (m, 2H), 7.47 – 7.29 (m, 4H), 5.76 (d,  $J = 7.9$  Hz, 1H), 5.56 (d,  $J = 9.0$  Hz, 1H), 5.43 (t,  $J = 9.8$  Hz, 1H), 5.23 (t,  $J = 9.7$  Hz, 1H), 5.10 – 4.94 (m, 2H), 4.91 – 4.80 (m, 2H), 4.58 – 4.14 (m, 8H), 4.14 – 4.05 (m, 2H), 4.05 – 3.88 (m, 2H), 3.72 – 3.51 (m, 2H), 2.08 (s, 6H), 2.07 (s, 3H), 2.04 (s, 3H), 2.03 (s, 3H), 2.02 (s, 3H), 1.95 (s, 3H), 1.53 (s, 9H), 1.32 (d,  $J = 5.6$  Hz, 3H);  $^{13}\text{C}$  NMR (100 MHz,  $\text{CDCl}_3$ )  $\delta$  170.65, 170.60, 170.56, 169.47, 169.32, 156.52, 143.84, 143.74, 141.31, 127.78, 127.11, 125.18, 120.04, 99.00, 98.89, 82.67, 74.15, 71.86, 71.65, 69.95, 69.21, 68.79, 67.36, 66.09, 62.89, 62.10, 58.92, 55.31, 47.17, 28.03, 23.24, 20.75, 20.71, 20.64, 17.88;  $[\text{M}+\text{Na}]^+$   $\text{C}_{49}\text{H}_{62}\text{N}_2\text{O}_{21}\text{Na}$  calculated for 1037.3743, found 1037.3752.

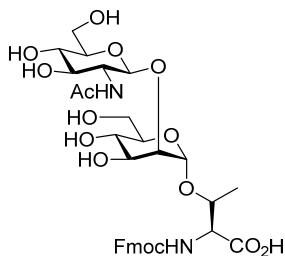

**$N^{\alpha}$ -9-Fluorenylmethyloxycarbonyl-O-[2-acetamido-2-deoxy- $\beta$ -D-glucopyranosyl-(1 $\rightarrow$ 2)- $\alpha$ -D-mannopyranosyl]-L-threonine (8, M100)**

Compound **7** (2.13 g, 2.1 mmol) was treated by following general procedure **C** to afford compound **8** (1.34 g, 90%) as white foam.  $R_f = 0.40$  (ethyl acetate/methanol/ $\text{H}_2\text{O}$ , 4:2:0.5, v/v);  $^1\text{H}$  NMR (400 MHz,  $\text{D}_2\text{O}$ )  $\delta$  7.74 – 7.60 (m, 2H), 7.60 – 7.40 (m, 2H), 7.40 – 7.18 (m, 4H), 4.60

(dd,  $J = 10.7, 4.9$  Hz, 1H), 4.42 – 4.27 (m, 2H), 4.23 (d,  $J = 6.3$  Hz, 1H), 4.12 – 3.96 (m, 1H), 3.83 – 3.71 (m, 4H), 3.71 – 3.42 (m, 7H), 3.42 – 3.30 (m, 3H), 3.27 (s, 1H), 1.96 (s, 3H), 0.94 (d,  $J = 6.1$  Hz, 3H);  $^{13}\text{C}$  NMR (100 MHz,  $\text{D}_2\text{O}$ )  $\delta$  174.87, 158.05, 143.91, 143.49, 140.96, 140.91, 127.96, 127.41, 124.90, 124.78, 120.09, 100.01, 98.04, 77.19, 75.59, 73.28, 73.05, 69.84, 69.26, 67.22, 65.92, 61.60, 60.52, 55.26, 47.10, 22.35, 18.33;  $[\text{M}-\text{H}]^-$   $\text{C}_{33}\text{H}_{41}\text{N}_2\text{O}_{15}$  calculated for 705.2585, found 705.2470.

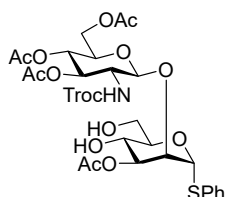

**Phenyl 3,4,6-tri-O-acetyl-2-deoxy-2-(2,2,2-trichloroethoxycarbonylamino)- $\beta$ -D-glucopyranosyl-(1 $\rightarrow$ 2)-3-O-acetyl-1-thio- $\alpha$ -D-Mannopyranoside (9)**

Compound **5** (3.58 g, 3.8 mmol) was treated by following general procedure **C** to afford compound **9** (2.27 g, 77%) as white foam.  $R_f = 0.33$  (hexane/acetone, 4:1, v/v);  $^1\text{H}$  NMR (400 MHz,  $\text{CDCl}_3$ )  $\delta$  7.42 (d,  $J = 6.5$  Hz, 2H), 7.36 – 7.19 (m, 3H), 6.00 (d,  $J = 8.2$  Hz, 1H), 5.35 (s, 1H), 5.25 (t,  $J = 9.9$  Hz, 1H), 4.99 (t,  $J = 9.5$  Hz, 1H), 4.88 (d,  $J = 9.6$  Hz, 1H), 4.71 – 4.56 (m, 2H), 4.52 – 4.37 (m, 2H), 4.33 – 4.15 (m, 2H), 4.15 – 3.97 (m, 2H), 3.87 (t,  $J = 10.5$  Hz, 1H), 3.80 – 3.45 (m, 4H), 2.93 (d,  $J = 8.7$  Hz, 1H), 2.10 (s, 3H), 2.08 (s, 3H), 2.00 (s, 3H), 1.98 (s, 3H);  $^{13}\text{C}$  NMR (100 MHz,  $\text{CDCl}_3$ )  $\delta$  170.99, 170.89, 170.77, 169.52, 154.57, 133.42, 131.69, 129.27, 127.94, 100.41, 95.00, 85.81, 76.94, 74.56, 73.42, 73.20, 71.77, 71.35, 68.58, 64.12, 62.12, 61.50, 56.05, 20.91, 20.68, 20.59;  $[\text{M}+\text{Na}]^+$   $\text{C}_{29}\text{H}_{36}\text{Cl}_3\text{NO}_{15}\text{SNa}$  calculated for 798.0769, found 798.0778.

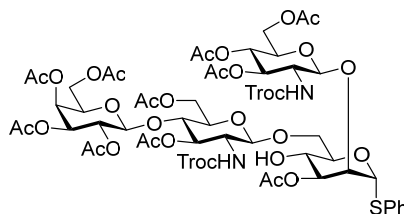

**Phenyl 3,4,6-tri-O-acetyl-2-deoxy-2-(2,2,2-trichloroethoxycarbonylamino)- $\beta$ -glucopyranosyl-(1 $\rightarrow$ 2)-[2,3,4,6-tetra-O-acetyl- $\beta$ -D-galactopyranosyl-(1 $\rightarrow$ 4)-3,6-di-O-acetyl-2-deoxy-2-(2,2,2-trichloroethoxycarbonylamino)- $\beta$ -D-glucopyranosyl]-(1 $\rightarrow$ 6)-3-O-acetyl-1-thio- $\alpha$ -D-mannopyranoside (10)**

Compound **9** (2.10 g, 2.7 mmol) was glycosylated with fresh-made donor **3** (3.05 g, 3.2 mmol) by following general procedure **A** to get the desired compound **10** (3.26 g, 79%) as white foam.  $R_f = 0.35$  (hexane/acetone, 2:1, v/v);  $^1\text{H}$  NMR (400 MHz,  $\text{CDCl}_3$ )  $\delta$  7.43 (d,  $J = 6.7$  Hz, 2H), 7.39 – 7.24 (m, 3H), 6.32 (d,  $J = 8.4$  Hz, 1H), 6.05 (d,  $J = 8.4$  Hz, 1H), 5.45 (s, 1H), 5.43 – 5.31 (m, 3H), 5.09 (dd,  $J = 10.3, 7.9$  Hz, 1H), 5.05 – 4.91 (m, 3H), 4.86 (dd,  $J = 9.8, 2.6$  Hz, 1H), 4.78 (d,  $J = 8.2$  Hz, 1H), 4.76 – 4.62 (m, 3H), 4.59 – 4.44 (m, 3H), 4.41 (s, 1H), 4.26 (dd,  $J = 12.3,$



5.4 Hz, 1H), 4.20 – 4.00 (m, 6H), 3.96 (d,  $J = 10.9$  Hz, 1H), 3.92 – 3.81 (m, 2H), 3.79 – 3.65 (m, 2H), 3.61 (dd,  $J = 8.7, 3.8$  Hz, 1H), 3.49 (dq,  $J = 17.4, 8.7$  Hz, 2H), 3.00 (s, 1H), 2.15 (s, 3H), 2.13 (s, 6H), 2.09 (s, 3H), 2.08 (s, 3H), 2.06 (s, 3H), 2.04 (s, 3H), 2.01 (s, 3H), 2.01 (s, 3H), 1.97 (s, 3H);  $^{13}\text{C}$  NMR (100 MHz,  $\text{CDCl}_3$ )  $\delta$  170.77, 170.68, 170.50, 170.40, 170.19, 170.12, 169.52, 169.11, 155.08, 154.61, 133.76, 130.97, 129.19, 127.63, 101.24, 100.97, 99.16, 95.48, 95.35, 85.16, 76.47, 74.73, 74.52, 73.30, 72.72, 72.47, 71.97, 71.14, 70.99, 70.74, 69.15, 68.88, 67.77, 66.67, 63.87, 62.07, 60.93, 56.75, 56.14, 21.03, 20.94, 20.88, 20.72, 20.69, 20.63, 20.60, 20.50;  $[\text{M}+\text{Na}]^+$   $\text{C}_{56}\text{H}_{70}\text{Cl}_6\text{N}_2\text{O}_{32}\text{SNa}$  calculated for 1547.1661, found 1547.1603.

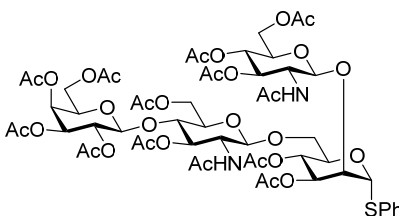

**Phenyl 2-acetamido-3,4,6-tri-O-acetyl-2-deoxy- $\beta$ -glucopyranosyl-(1 $\rightarrow$ 2)-[2,3,4,6-tetra-O-acetyl- $\beta$ -D-galactopyranosyl-(1 $\rightarrow$ 4)-2-acetamido-3,6-di-O-acetyl-2-deoxy- $\beta$ -D-glucopyranosyl-(1 $\rightarrow$ 6)]-3,4-di-O-acetyl-1-thio- $\alpha$ -D-mannopyranoside (11)**

Compound **10** (3.10 g, 2.0 mmol) was treated by following general procedure **C** to afford compound **11** (2.30 g, 87%) as white foam.  $R_f = 0.22$  (hexane/acetone, 3:2, v/v);  $^1\text{H}$  NMR (400 MHz,  $\text{CDCl}_3$ )  $\delta$  7.46 – 7.36 (m, 2H), 7.35 – 7.26 (m, 3H), 7.26 – 7.20 (m, 1H), 6.46 (d,  $J = 10.0$  Hz, 1H), 5.89 (dd,  $J = 10.7, 9.2$  Hz, 1H), 5.68 (d,  $J = 1.1$  Hz, 1H), 5.50 – 5.37 (m, 2H), 5.34 (d,  $J = 2.8$  Hz, 1H), 5.14 – 4.99 (m, 3H), 4.99 – 4.82 (m, 2H), 4.54 – 4.36 (m, 3H), 4.26 (dd,  $J = 12.2, 5.9$  Hz, 1H), 4.22 – 4.11 (m, 3H), 4.11 – 4.00 (m, 4H), 3.95 (dd,  $J = 12.1, 2.2$  Hz, 1H), 3.85 (t,  $J = 7.1$  Hz, 1H), 3.80 – 3.66 (m, 2H), 3.53 (ddd,  $J = 9.7, 5.0, 1.8$  Hz, 1H), 3.15 (d,  $J = 10.8$  Hz, 1H), 3.02 – 2.89 (m, 1H), 2.14 (s, 3H), 2.11 (s, 3H), 2.08 (s, 6H), 2.07 (s, 3H), 2.05 (s, 3H), 2.04 (d,  $J = 3.8$  Hz, 3H), 2.02 (d,  $J = 4.8$  Hz, 6H), 1.99 (s, 3H), 1.98 (s, 3H), 1.95 (s, 3H), 1.88 (s, 3H);  $^{13}\text{C}$  NMR (100 MHz,  $\text{CDCl}_3$ )  $\delta$  172.69, 172.18, 170.86, 170.60, 170.31, 170.29, 170.08, 170.00, 169.93, 169.78, 169.08, 133.09, 130.04, 129.24, 127.24, 102.96, 101.07, 96.29, 83.45, 77.41, 77.09, 76.78, 76.15, 74.31, 72.83, 72.75, 71.88, 70.88, 70.62, 70.55, 70.43, 69.98, 69.53, 69.15, 68.44, 66.51, 65.77, 62.35, 62.07, 60.57, 56.92, 53.49, 23.28, 23.25, 21.02, 20.89, 20.80, 20.67, 20.64, 20.61, 20.58, 20.52, 20.48;  $[\text{M}+\text{Na}]^+$   $\text{C}_{56}\text{H}_{74}\text{N}_2\text{O}_{31}\text{SNa}$  calculated for 1325.3894, found 1325.3935.

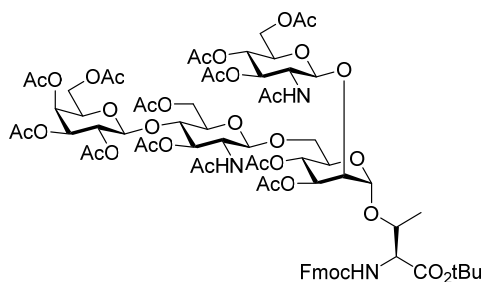

**N<sup>α</sup>-9-Fluorenylmethyloxycarbonyl-O- $\{$ 2-acetamido-3,4,6-tri-O-acetyl-2-deoxy- $\beta$ -glucopyranosyl-(1 $\rightarrow$ 2)-[2,3,4,6-tetra-O-acetyl- $\beta$ -D-galactopyranosyl-(1 $\rightarrow$ 4)-2-acetamido-3,6-di-O-acetyl-2-deoxy- $\beta$ -D-glucopyranosyl]- $\{$ -(1 $\rightarrow$ 6)-3,4-di-O-acetyl- $\alpha$ -D-mannopyranosyl]-L-threonine tertbutyl ester (12)**

Compound **11** (2.00 g, 1.5 mmol) was glycosylated with compound **4** (1.19 g, 3.0 mmol) by following general procedure **B** to get the desired compound **12** (2.12 g, 89%) as white foam.  $R_f$  = 0.24 (hexane/acetone, 3:2, v/v);  $^1\text{H NMR}$  (600 MHz,  $\text{CDCl}_3$ )  $\delta$  7.80 – 7.74 (m, 2H), 7.69 – 7.52 (m, 2H), 7.44 – 7.37 (m, 2H), 7.37 – 7.30 (m, 3H), 6.44 (d,  $J$  = 10.0 Hz, 1H), 5.95 – 5.85 (m, 1H), 5.60 (d,  $J$  = 9.3 Hz, 1H), 5.43 – 5.31 (m, 3H), 5.17 – 5.01 (m, 3H), 4.96 (dd,  $J$  = 10.4, 3.4 Hz, 1H), 4.94 – 4.83 (m, 2H), 4.54 – 4.42 (m, 3H), 4.42 – 4.23 (m, 5H), 4.23 – 4.02 (m, 7H), 3.97 – 3.83 (m, 2H), 3.83 – 3.70 (m, 2H), 3.70 – 3.60 (m, 1H), 3.60 – 3.52 (m, 1H), 3.14 (d,  $J$  = 11.3 Hz, 1H), 2.91 (dd,  $J$  = 17.8, 7.9 Hz, 1H), 2.16 (s, 3H), 2.12 (s, 3H), 2.11 (s, 3H), 2.09 (s, 3H), 2.09 (s, 3H), 2.07 (t,  $J$  = 2.7 Hz, 6H), 2.05 (s, 3H), 2.04 (s, 3H), 2.02 (s, 3H), 1.99 (s, 3H), 1.97 (s, 3H), 1.95 (s, 3H), 1.52 (s, 9H), 1.31 – 1.24 (m, 3H);  $^{13}\text{C NMR}$  (150 MHz,  $\text{CDCl}_3$ )  $\delta$  172.57, 172.20, 170.87, 170.63, 170.32, 170.11, 170.04, 169.97, 169.93, 169.89, 169.10, 169.03, 156.59, 143.95, 143.79, 141.29, 127.71, 127.11, 127.08, 125.25, 119.98, 119.95, 102.90, 101.11, 98.35, 96.47, 82.46, 78.01, 76.15, 72.90, 72.80, 72.71, 71.80, 70.91, 70.64, 70.62, 70.07, 69.85, 69.17, 69.09, 68.32, 67.25, 66.52, 65.79, 62.39, 61.97, 60.57, 59.03, 56.99, 53.51, 47.20, 28.11, 23.30, 23.28, 21.04, 20.93, 20.85, 20.81, 20.69, 20.63, 20.61, 20.58, 20.50, 18.06;  $[\text{M}+\text{Na}]^+$   $\text{C}_{73}\text{H}_{95}\text{N}_3\text{O}_{36}\text{Na}$  calculated for 1612.5593, found 1612.5678.

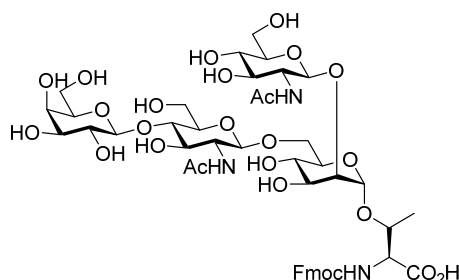

**N<sup>α</sup>-9-Fluorenylmethyloxycarbonyl-O- $\{$ 2-acetamido-2-deoxy- $\beta$ -glucopyranosyl-(1 $\rightarrow$ 2)-[ $\beta$ -D-galactopyranosyl-(1 $\rightarrow$ 4)-2-acetamido-2-deoxy- $\beta$ -D-glucopyranosyl]- $\{$ -(1 $\rightarrow$ 6)- $\alpha$ -D-mannopyranosyl]-L-threonine (13, M301)**

Compound **12** (1.90 g, 1.2 mmol) was treated by following general procedure **C** to afford compound **13** (1.11 g, 85%) as white foam.  $R_f$  = 0.30 (ethyl acetate/methanol/ $\text{H}_2\text{O}$ , 4:2:0.5, v/v);  $^1\text{H NMR}$  (400 MHz,  $\text{MeOD}$ )  $\delta$  7.79 (d,  $J$  = 7.5 Hz, 2H), 7.74 – 7.58 (m, 2H), 7.44 – 7.27 (m, 4H), 4.55 (d,  $J$  = 7.7 Hz, 1H), 4.50 – 4.31 (m, 5H), 4.23 (t,  $J$  = 6.7 Hz, 1H), 4.18 – 4.02 (m, 2H), 4.01 – 3.84 (m, 5H), 3.84 – 3.51 (m, 14H), 3.51 – 3.30 (m, 6H), 2.08 (s, 3H), 2.06 (s, 3H), 1.22 (d,  $J$  = 5.9 Hz, 2H);  $^{13}\text{C NMR}$  (100 MHz,  $\text{MeOD}$ )  $\delta$  173.40, 172.73, 157.41, 144.06, 143.80, 141.18, 127.42, 126.85, 124.88, 119.55, 103.81, 101.78, 98.66, 79.69, 79.33, 76.38, 75.74, 75.04, 73.89, 73.41, 72.46, 71.20, 70.54, 69.85, 68.93, 68.64, 67.77, 66.59, 61.16, 60.88, 60.39, 55.28, 47.08, 22.35, 22.12, 18.44;  $[\text{M}-\text{H}]^-$   $\text{C}_{47}\text{H}_{64}\text{N}_3\text{O}_{25}$  calculated for 1071.3907, found 1071.3741.

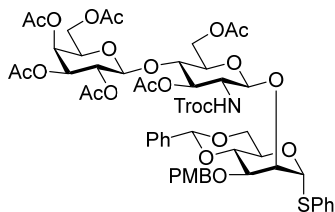

**Phenyl 2,3,4,6-tetra-O-acetyl- $\beta$ -D-galactopyranosyl-(1 $\rightarrow$ 4)-3,6-di-O-acetyl-2-deoxy-2-(2,2,2-trichloroethoxycarbonylamino)- $\beta$ -D-glucopyranosyl-(1 $\rightarrow$ 2)-4,6-O-benzylidene-3-(4-Methoxybenzyl)-1-thio- $\alpha$ -D-Mannopyranoside (14)**

Compound **1** (1.8 g, 3.8 mmol) was glycosylated with fresh-made donor **3** (4.23 g, 4.5 mmol) by following general procedure **A** to get the desired compound **14** (3.46 g, 75%) as white foam.  $R_f$  = 0.33 (hexane/acetone, 3:1, v/v);  $^1\text{H NMR}$  (400 MHz,  $\text{CDCl}_3$ )  $\delta$  7.51 (dd,  $J$  = 7.6, 1.8 Hz, 2H), 7.46 – 7.25 (m, 10H), 6.87 (d,  $J$  = 8.7 Hz, 2H), 5.62 (s, 1H), 5.48 (s, 1H), 5.43 – 5.23 (m, 3H), 5.12 (dd,  $J$  = 10.4, 7.9 Hz, 1H), 4.97 (dd,  $J$  = 10.4, 3.4 Hz, 1H), 4.81 (d,  $J$  = 8.2 Hz, 1H), 4.75 – 4.62 (m, 3H), 4.59 – 4.45 (m, 3H), 4.34 (d,  $J$  = 1.7 Hz, 1H), 4.30 – 4.03 (m, 6H), 3.94 – 3.86 (m, 2H), 3.85 – 3.72 (m, 5H), 3.65 – 3.51 (m, 2H), 2.15 (s, 3H), 2.06 (s, 3H), 2.06 (s, 6H), 2.04 (s, 3H), 1.97 (s, 3H);  $^{13}\text{C NMR}$  (100 MHz,  $\text{CDCl}_3$ )  $\delta$  170.40, 170.33, 170.15, 170.08, 169.09, 159.30, 153.99, 137.55, 133.40, 131.49, 130.00, 129.44, 129.24, 128.90, 128.23, 127.84, 126.10, 113.80, 101.53, 100.98, 99.17, 95.32, 86.79, 78.47, 76.24, 74.48, 74.23, 73.00, 71.90, 71.38, 70.97, 70.75, 69.13, 68.46, 66.69, 65.30, 62.24, 60.94, 55.98, 55.26, 20.82, 20.79, 20.66, 20.63, 20.61, 20.52;  $[\text{M}+\text{Na}]^+$   $\text{C}_{54}\text{H}_{62}\text{Cl}_3\text{NO}_{23}\text{SNa}$  calculated for 1252.2397, found 1252.2444.

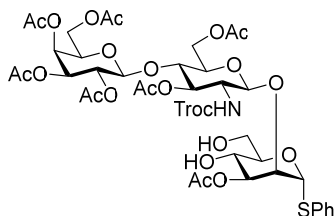

**Phenyl 2,3,4,6-tetra-O-acetyl- $\beta$ -D-galactopyranosyl-(1 $\rightarrow$ 4)-3,6-di-O-acetyl-2-deoxy-2-(2,2,2-trichloroethoxycarbonylamino)- $\beta$ -D-glucopyranosyl-(1 $\rightarrow$ 2)-3-O-acetyl-1-thio- $\alpha$ -D-Mannopyranoside (15)**

Compound **14** (3.3 g, 2.7 mmol) was treated by following general procedure **C** to afford compound **15** (2.31 g, 81%) as white foam.  $R_f$  = 0.22 (hexane/acetone, 2:1, v/v);  $^1\text{H NMR}$  (400 MHz,  $\text{CDCl}_3$ )  $\delta$  7.40 (d,  $J$  = 6.6 Hz, 2H), 7.34 – 7.21 (m, 3H), 6.07 (d,  $J$  = 9.1 Hz, 1H), 5.35 (s, 1H), 5.32 (d,  $J$  = 3.1 Hz, 1H), 5.10 – 4.99 (m, 2H), 4.94 (dd,  $J$  = 10.4, 3.3 Hz, 1H), 4.87 (dd,  $J$  = 9.9, 2.6 Hz, 1H), 4.72 (d,  $J$  = 11.9 Hz, 1H), 4.52 – 4.42 (m, 2H), 4.38 (d,  $J$  = 11.7 Hz, 3H), 4.31 – 4.19 (m, 1H), 4.15 – 3.98 (m, 4H), 3.94 – 3.78 (m, 2H), 3.78 – 3.63 (m, 3H), 3.63 – 3.53 (m, 1H), 3.43 (d,  $J$  = 3.9 Hz, 1H), 2.97 (d,  $J$  = 8.7 Hz, 1H), 2.11 (s, 3H), 2.09 (s, 3H), 2.06 (s, 3H), 2.03 (s, 3H), 2.02 (s, 3H), 1.98 (s, 3H), 1.94 (s, 3H);  $^{13}\text{C NMR}$  (100 MHz,  $\text{CDCl}_3$ )  $\delta$  171.12, 170.46, 170.42, 170.15, 170.13, 169.44, 154.88, 133.34, 131.56, 129.27, 127.88, 101.17, 100.94, 95.06, 85.69, 76.09, 74.58, 73.61, 73.28, 72.73, 71.63, 70.83, 70.69, 69.19, 66.66, 63.99, 62.23, 61.48, 60.91, 55.97, 20.87, 20.78, 20.75, 20.64, 20.58, 20.47;  $[\text{M}+\text{Na}]^+$   $\text{C}_{41}\text{H}_{52}\text{Cl}_3\text{NO}_{23}\text{SNa}$  calculated for 1086.1614, found 1086.1658.

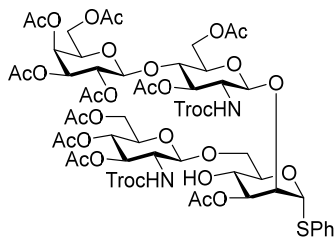

**Phenyl 2,3,4,6-tetra-O-acetyl- $\beta$ -D-galactopyranosyl-(1 $\rightarrow$ 4)-3,6-di-O-acetyl-2-deoxy-2-(2,2,2-trichloroethoxycarbonylamino)- $\beta$ -D-glucopyranosyl-(1 $\rightarrow$ 2)-[3,4,6-tri-O-acetyl-2-deoxy-2-(2,2,2-trichloroethoxycarbonylamino)- $\beta$ -glucopyranosyl-(1 $\rightarrow$ 6)]-3-O-acetyl-1-thio- $\alpha$ -D-Mannopyranosyl (16)**

Compound **15** (2.10 g, 2.0 mmol) was glycosylated with fresh-made donor **2** (1.54 g, 2.4 mmol) by following general procedure **A** to get the desired compound **16** (2.75 g, 82%) as white foam.  $R_f$  = 0.25 (hexane/acetone, 2:1, v/v);  $^1\text{H NMR}$  (400 MHz,  $\text{CDCl}_3$ )  $\delta$  7.39 (dd,  $J$  = 7.5, 1.7 Hz, 2H), 7.34 – 7.21 (m, 3H), 6.96 (d,  $J$  = 7.0 Hz, 1H), 5.93 (d,  $J$  = 9.7 Hz, 1H), 5.73 (t,  $J$  = 10.0 Hz, 1H), 5.43 (s, 1H), 5.33 (d,  $J$  = 3.2 Hz, 1H), 5.18 – 4.89 (m, 6H), 4.81 (dd,  $J$  = 10.0, 2.7 Hz, 1H), 4.72 – 4.53 (m, 3H), 4.50 – 4.38 (m, 3H), 4.36 (s, 1H), 4.24 (dd,  $J$  = 12.3, 4.4 Hz, 1H), 4.16 – 4.03 (m, 4H), 4.03 – 3.89 (m, 4H), 3.85 (t,  $J$  = 6.6 Hz, 1H), 3.83 – 3.65 (m, 3H), 3.65 – 3.56 (m, 1H), 3.17 (dd,  $J$  = 18.1, 8.0 Hz, 1H), 2.12 (s, 3H), 2.11 (s, 3H), 2.09 (s, 3H), 2.05 (s, 3H), 2.04 (s, 6H), 2.01 (s, 3H), 2.01 (s, 3H), 1.95 (s, 3H), 1.94 (s, 3H);  $^{13}\text{C NMR}$  (100 MHz,  $\text{CDCl}_3$ )  $\delta$  170.80, 170.59, 170.51, 170.42, 170.14, 170.10, 169.76, 169.29, 154.95, 133.57, 130.98, 129.18, 127.65, 101.23, 100.94, 100.49, 96.05, 94.96, 85.58, 77.60, 76.27, 75.19, 74.19, 73.55, 72.93, 72.63, 71.62, 71.44, 70.96, 70.87, 70.45, 69.34, 69.09, 67.65, 66.80, 63.26, 62.51, 62.13, 61.26, 57.10, 55.69, 21.02, 20.88, 20.81, 20.75, 20.64, 20.60, 20.57, 20.55, 20.48;  $[\text{M}+\text{Na}]^+$   $\text{C}_{56}\text{H}_{70}\text{Cl}_6\text{N}_2\text{O}_{32}\text{SNa}$  calculated for 1547.1661, found 1547.1738.

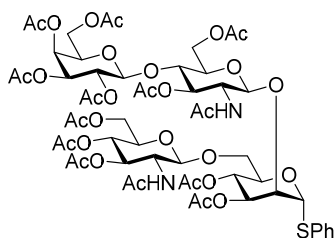

**Phenyl 2,3,4,6-tetra-O-acetyl- $\beta$ -D-galactopyranosyl-(1 $\rightarrow$ 4)-2-acetamido-3,6-di-O-acetyl-2-deoxy- $\beta$ -D-glucopyranosyl-(1 $\rightarrow$ 2)-[2-acetamido-3,4,6-tri-O-acetyl-2-deoxy- $\beta$ -glucopyranosyl-(1 $\rightarrow$ 6)]-3,4-di-O-acetyl-1-thio- $\alpha$ -D-Mannopyranoside (17)**

Compound **16** (2.50 g, 1.6 mmol) was treated by following general procedure **C** to afford compound **17** (1.75 g, 82%) as white foam.  $R_f$  = 0.22 (hexane/acetone, 3:2, v/v);  $^1\text{H NMR}$  (400 MHz,  $\text{CDCl}_3$ )  $\delta$  7.46 – 7.36 (m, 2H), 7.36 – 7.26 (m, 2H), 7.26 – 7.19 (m, 1H), 7.10 (d,  $J$  = 6.9 Hz, 1H), 6.55 (d,  $J$  = 9.9 Hz, 1H), 5.84 (dd,  $J$  = 10.6, 8.9 Hz, 1H), 5.74 (s, 1H), 5.50 – 5.38 (m, 2H), 5.33 (d,  $J$  = 2.8 Hz, 1H), 5.15 – 4.98 (m, 4H), 4.94 (dd,  $J$  = 10.4, 3.4 Hz, 1H), 4.48 (d,  $J$  = 7.9 Hz, 1H), 4.37 – 3.97 (m, 11H), 3.85 (t,  $J$  = 7.0 Hz, 1H), 3.77 – 3.55 (m, 3H), 3.19 (d,  $J$  = 10.9 Hz, 1H), 2.90 (dt,  $J$  = 10.5, 8.1 Hz, 1H), 2.15 (s, 3H), 2.12 (s, 3H), 2.10 (s, 3H), 2.09 (s, 3H), 2.08 (s, 3H), 2.05 (s, 3H), 2.03 (s, 6H), 2.02 (s, 3H), 2.01 (s, 3H), 1.98 (s, 3H), 1.95 (s, 3H), 1.91

(s, 3H);  $^{13}\text{C}$  NMR (100 MHz,  $\text{CDCl}_3$ )  $\delta$  172.73, 172.09, 171.03, 170.70, 170.63, 170.53, 170.35, 170.26, 170.10, 169.92, 169.37, 169.32, 168.87, 133.13, 129.74, 129.24, 127.13, 103.01, 100.62, 96.29, 83.11, 77.85, 74.47, 72.98, 72.86, 71.86, 70.99, 70.57, 70.47, 70.36, 69.49, 69.07, 68.55, 68.49, 66.62, 65.93, 62.44, 61.96, 60.78, 57.07, 53.41, 23.32, 23.16, 21.08, 21.05, 20.70, 20.69, 20.67, 20.61, 20.57, 20.55, 20.52, 20.48;  $[\text{M}+\text{Na}]^+$   $\text{C}_{56}\text{H}_{74}\text{N}_2\text{O}_{31}\text{SNa}$  calculated for 1325.3894, found 1325.3946.

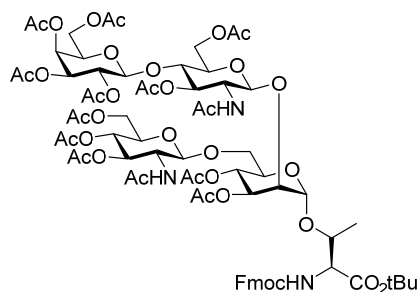

**N<sup>α</sup>-9-Fluorenylmethoxycarbonyl-O- $\{2,3,4,6$ -tetra-O-acetyl- $\beta$ -D-galactopyranosyl-(1 $\rightarrow$ 4)-2-acetamido-3,6-di-O-acetyl-2-deoxy- $\beta$ -D-glucopyranosyl-(1 $\rightarrow$ 2)-[2-acetamido-3,4,6-tri-O-acetyl-2-deoxy- $\beta$ -glucopyranosyl-(1 $\rightarrow$ 6)]-3,4-di-O-acetyl- $\alpha$ -D-Mannopyranosyl}-L-threonine tertbutyl ester (18)**

Compound **17** (1.57 g, 1.2 mmol) was glycosylated with compound **4** (0.98 g, 2.4 mmol) by following general procedure **B** to get the desired compound **18** (1.56 g, 83%) as white foam.  $R_f$  = 0.23 (hexane/acetone, 3:2, v/v);  $^1\text{H}$  NMR (400 MHz,  $\text{CDCl}_3$ )  $\delta$  7.76 (d,  $J$  = 7.4 Hz, 2H), 7.71 – 7.51 (m, 2H), 7.49 – 7.25 (m, 5H), 7.05 (d,  $J$  = 7.0 Hz, 1H), 6.51 (d,  $J$  = 9.6 Hz, 1H), 5.87 – 5.72 (m, 1H), 5.57 (d,  $J$  = 9.3 Hz, 1H), 5.41 – 5.28 (m, 3H), 5.19 – 5.01 (m, 4H), 5.01 – 4.87 (m, 2H), 4.59 – 4.41 (m, 3H), 4.41 – 3.96 (m, 16H), 3.90 – 3.81 (m, 1H), 3.81 – 3.70 (m, 1H), 3.70 – 3.55 (m, 3H), 3.17 (d,  $J$  = 11.2 Hz, 1H), 2.88 (dd,  $J$  = 17.5, 8.1 Hz, 1H), 2.18 (s, 3H), 2.16 (s, 3H), 2.12 (s, 3H), 2.12 (s, 3H), 2.10 (s, 3H), 2.06 (s, 3H), 2.05 (s, 3H), 2.05 (s, 3H), 2.04 (s, 6H), 2.02 (s, 3H), 1.97 (s, 3H), 1.94 (s, 3H), 1.52 (s, 9H), 1.27 (d,  $J$  = 8.5 Hz, 3H);  $^{13}\text{C}$  NMR (100 MHz,  $\text{CDCl}_3$ )  $\delta$  172.45, 172.04, 171.00, 170.70, 170.62, 170.57, 170.35, 170.22, 170.12, 169.82, 169.38, 169.01, 156.57, 143.95, 143.78, 141.28, 127.70, 127.10, 125.25, 119.98, 102.88, 101.06, 98.03, 96.56, 82.47, 78.21, 77.93, 72.88, 72.79, 71.91, 71.03, 70.88, 70.52, 69.85, 69.50, 69.22, 69.11, 68.61, 68.38, 67.25, 66.53, 65.93, 62.51, 62.00, 60.61, 58.98, 57.02, 53.84, 53.48, 47.19, 29.28, 28.13, 23.28, 23.18, 21.09, 20.72, 20.68, 20.63, 20.59, 20.53, 17.95;  $[\text{M}+\text{Na}]^+$   $\text{C}_{73}\text{H}_{95}\text{N}_3\text{O}_{36}\text{Na}$  calculated for 1612.5593, found 1612.5663.

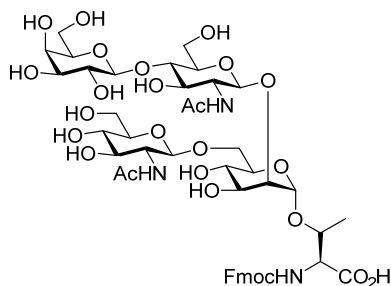

**N<sup>α</sup>-9-Fluorenylmethoxycarbonyl-O- $\{\beta$ -D-galactopyranosyl-(1 $\rightarrow$ 4)-2-acetamido-2-deoxy- $\beta$ -D-glucopyranosyl-(1 $\rightarrow$ 2)-[2-acetamido-2-deoxy- $\beta$ -glucopyranosyl-(1 $\rightarrow$ 6)]- $\alpha$ -D-Mannopyranosyl}-L-threonine (19, M201)**

Compound **18** (1.90 g, 1.2 mmol) was treated by following general procedure **C** to afford compound **19** (1.09 g, 87%) as white foam.  $R_f$  = 0.30 (ethyl acetate/methanol/H<sub>2</sub>O, 4:2:0.5, v/v); <sup>1</sup>H NMR (400 MHz, D<sub>2</sub>O)  $\delta$  7.68 – 7.56 (m, 2H), 7.56 – 7.36 (m, 2H), 7.36 – 7.16 (m, 5H), 4.59 – 4.51 (m, 1H), 4.47 (d,  $J$  = 8.4 Hz, 1H), 4.43 – 4.23 (m, 4H), 4.18 (d,  $J$  = 6.4 Hz, 1H), 4.09 (d,  $J$  = 10.3 Hz, 1H), 3.98 (d,  $J$  = 4.8 Hz, 1H), 3.90 – 3.80 (m, 4H), 3.80 – 3.55 (m, 16H), 3.55 – 3.42 (m, 5H), 3.41 – 3.24 (m, 5H), 1.97 (s, 3H), 1.95 (s, 4H), 0.95 (d,  $J$  = 6.1 Hz, 3H); <sup>13</sup>C NMR (100 MHz, D<sub>2</sub>O)  $\delta$  174.59, 174.15, 158.00, 143.88, 143.45, 140.96, 140.90, 127.97, 127.43, 124.80, 120.11, 102.90, 101.16, 99.84, 98.22, 78.31, 77.18, 76.85, 75.90, 75.31, 74.56, 73.93, 72.48, 71.95, 70.94, 70.06, 69.21, 68.56, 67.59, 65.98, 61.02, 60.87, 59.88, 55.57, 54.82, 48.89, 47.09, 22.50, 22.33, 18.49; [M+Na]<sup>+</sup> C<sub>47</sub>H<sub>65</sub>N<sub>3</sub>O<sub>25</sub>Na calculated for 1094.3805, found 1094.3876.

## II. Enzymatic Extensions

### Materials and enzymes

*N*-Acetylneuraminic acid (Neu5Ac), *N*-Glycolylneuraminic acid (Neu5Gc) and cytidine 5'-triphosphate (CTP) were purchased from Carbosynth Limited. Sugar nucleotides uridine 5'-diphospho-galactose (UDP-Gal)<sup>[3]</sup>, guanosine 5'-diphospho-L-fucose (GDP-Fuc)<sup>[4]</sup>, uridine 5'-diphosphoglucuronic acid (UDP-GlcA)<sup>[5]</sup> were prepared as described previously reported. Enzymes including CMP-sialic acid synthetase from *Neisseria meningitidis* (NmCSS),<sup>[6]</sup> mutant M144D of  $\alpha$ 2,3-sialyltransferase 1 from *Pasteurella multocida* (PmST1-M144D),<sup>[7]</sup> mutant E271F/R313Y of PmST1 (PmST1m),<sup>[8]</sup>  $\alpha$ 2,6-sialyltransferase from *Photobacterium damsela* (Pd2,6ST),<sup>[9]</sup>  $\beta$ 1,4-galactosyltransferase from *N. meningitidis* (NmLgtB),<sup>[10]</sup> and C-terminal 66 amino acid truncated  $\alpha$ 1,3-fucosyltransferase from *Helicobacter pylori* (Hp3FT)<sup>[11]</sup> were expressed and purified as previously described. All enzymes were desalted against 50 mM Tris-HCl, and 20% glycerol, and stored at -20 °C for long-term use.  $\beta$ -galactosidase ( $\beta$ GalD) from *Streptococcus pneumoniae* was purchased from Prozyme, CA.

### Cloning and expression of human GlcAT-P

The human  $\beta$ 1,3-glucuronyltransferase gene (GlcAT-P) gene (GenBank: AB029396.1) was codon optimized, synthesized and cloned into vector pET15b vector (Genescript, NJ). The recombinant plasmid harboring GlcAT-P was transformed into *E. coli* BL21 (DE3) for heterogenous expression. The recombinant strain was cultured in LB medium at 37 °C with brief shaking (180 rpm) until OD<sub>600nm</sub> reached 0.6 to 0.8, followed by addition of isopropyl-b-D-thiogalactopyranoside (IPTG) to a final concentration of 0.2 mM. After 20 h induction at 16 °C, the cells were harvested by centrifuging at 4000 rpm for 30 min. The target protein was expressed as inclusion body. *E. coli* cell lysate was used to in GlcAT-P-catalyzed reactions.

#### Optimized GlcAT gene sequence

```
CATCAATCCACCCTGGCACCGCTGCTGGCAGTCCATAAGGACGAAGGTTCCGATCCG
CGTCGTGAGACCCCGCCGGGCGCAGACCCGCGTGAGTACTGCACCAGCGATCGTGA
CATCGTGGAAGTGGTGCGTACCGAATACGTTTACACCCGTCCGCCGCGGTGGAGCG
ATACCCTGCCGACCATCCACGTGGTTACCCCGACCTACAGCCGTCCGGTGCAGAAGG
CTGAGCTGACCCGTATGGCTAACACCCTGCTGCACGTTCCGAACCTGCACTGGCTGG
TTGTGGAAGATGCGCCGCGTCGTACCCCGCTGACCGCTCGTCTGCTGCGTGACACCG
GTCTGA ACTACACCACCTGCACGTGGAAACCCCGCGTAACTACAAACTGCGTGGT
GACGCTCGTGACCCGCGTATCCCGCGTGGTACCATGCAGCGTAACTGGCTCTGCGT
TGGCTGCGTGAAACCTTCCCGCGTAAACAGCAGCCAGCCGGGCGTGGTTTACTTCGCG
GACGATGACAACACCTACAGCCTGGAAGTTCGAGGAAATGCGTAGCACCCGTCG
TGTGAGCGTTTGGCCGGTGGCTTTCGTTGGTGGCCTGCGTTACGAGGCGCCGCGTGT
GAACGGTGCTGGCAAGGTGGTTCGTTGGAAAACCGTTTTTCGATCCGCACCGTCCGTT
CGCGATCGACATGGCGGGTTTCGCTGTGAACCTGCGTCTGATCCTGCAGCGTAGCCA
GGCTTACTTCAAGCTGCGTGGCGTGAAAGGTGGCTACCAGGAGAGCAGCCTGCTGC
GTGAACTGGTTACCCTGAACGACCTGGAACCGAAGGCGGCTAACTGCACCAAATC
CTGGTGTGGCACACCCGTACCGAGAAGCCGGTGTGGTGAATGAAGGCAAGAAAGG
TTTTACCGACCCGTCCGTTGAGATT
```

## General HPLC methods

HPLC method for monitoring reactions and purity analysis of final products: An analytical GL Science Inertsil ODS-4 column (100 Å, 5 µm, 4.6 mm × 250 mm) was used for separation, monitored by a UV detector (260 nm) or fluorescent detector (Ex 260nm, Em 310 nm).<sup>[12]</sup> The running solvents are solvent A (H<sub>2</sub>O with 0.1% TFA) and solvent B (acetonitrile with 0.1% TFA). The running condition is gradient elution with solvent B% linear increased from 20% to 40% within 25 mins, with a total flow rate of 1 mL/min.

HPLC method for purifying final products: An analytical GL Science Inertsil ODS-4 column (100 Å, 5 µm, 4.6 mm × 250 mm) was used for separating small reactions with 3 mg or less products, and a semipreparative Inertsil ODS-4 column (100 Å, 5 µm, 20 mm × 250 mm) was used for separating products with over 5 mgs. The method for using the analytical column is same as above and monitored by a UV detector (260 nm). The method for using the semipreparative column is similar as that for the analytical column, with the only difference of flow rate at 18.9 mL/min instead. Commonly, the analytical column enabled up to 1 mg product separation per run, while the semipreparative one enabled up to 15 mg product separation per run.

## HPLC quantification of purified glycans

Firstly, 10 mg M201 was weighted out accurately and diluted to 1 µM as standard solution. Then different volumes of standard solution, 1 µL, 2 µL, 3 µL, 4 µL, 6 µL, 8 µL, 10 µL, 20 µL, 30 µL, 40 µL, 60 µL, 80 µL, were injected into the HPLC by the method mentioned above using fluorescent (Ex. 260 nm, Em. 310 nm) in three replicates. The peak area of each injection was recorded and calculated to make the standard curve. All the purified glycans was quantified by the same condition as built the standard curve.

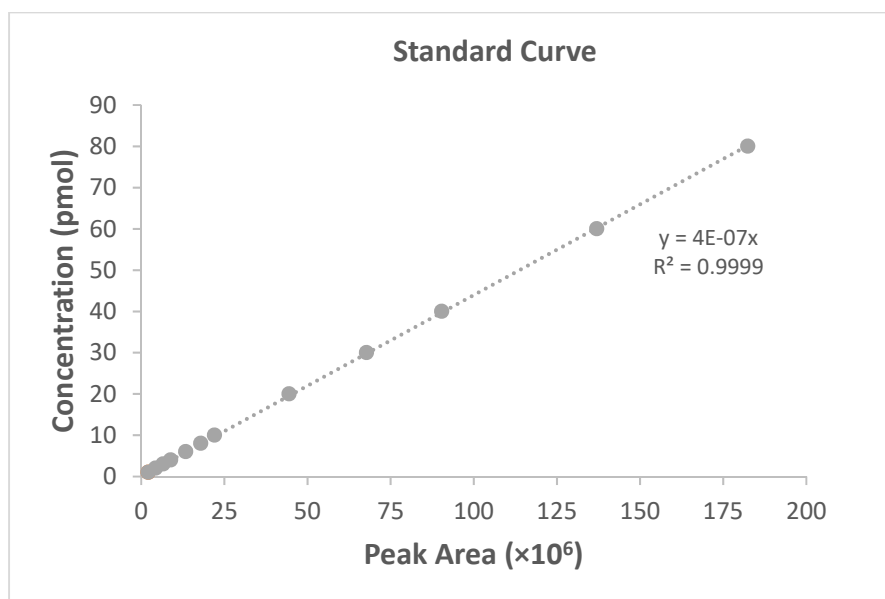



## **General methods for O-mannosyl glycan preparation and purification**

### **A) $\beta$ 1,4-galactosylation by NmLgtB**

Reaction mixtures contain Tris-HCl (100 mM, pH 7.5), an acceptor O-mannosyl glycan (10 mM), UDP-Gal (15 mM), MgCl<sub>2</sub> (10 mM), and an appropriate amount of NmLgtB. Reactions were incubated at 37 °C overnight and monitored by HPLC and/or MALDI-MS. After over 90% acceptor was converted, the reaction was quenched by freezing at -80 °C for 30 min, thaw and brief centrifugation to remove protein precipitants. The sample was then concentrated and subject for HPLC separation, product-containing fractions were pooled and lyophilized for characterization and next step use. The purity and quantification of each glycan was confirmed by HPLC as described above. NmLgtB-catalyzed reactions give 90-96% yields (HPLC purified glycan product/starting glycan substrate  $\times$  100%)

### **B) One-pot two-enzyme $\alpha$ 2,3-sialylation catalyzed by PmST1-M144D or PmST1m**

Reaction mixtures contain Tris-HCl (100 mM, pH 7.5), an acceptor glycan (10 mM), CTP (15 mM), Neu5Ac or Neu5Gc (15 mM), MgCl<sub>2</sub> (10 mM), and appropriate amount of NmCSS and PmST1-M144D (or PmST1m). PmST1-M144D-catalyzed reactions were incubated at 37 °C overnight and monitored by HPLC and/or MALDI-TOF. After over 90% acceptor was converted, the reaction was quenched, concentrated and subject for HPLC separation. PmST1m-catalyzed reactions were incubated at 37 °C for 30 min, quenched, and concentrated for HPLC separation. Product-containing fractions were pooled and lyophilized for characterization and next step use. PmST1-catalyzed reactions give 85-92% yields (HPLC purified glycan product/starting glycan substrate  $\times$  100%).

### **C) One-pot two-enzyme $\alpha$ 2,6-sialylation catalyzed by Pd26ST**

Reaction mixtures contain Tris-HCl (100 mM, pH 7.5), an acceptor glycan (10 mM), CTP (15 mM), Neu5Ac or Neu5Gc (15 mM), MgCl<sub>2</sub> (10 mM), and appropriate amount of NmCSS and Pd26ST. Reactions were incubated at 37 °C overnight and monitored by HPLC and/or MALDI-TOF. After over 90% acceptor was converted, reactions were quenched, concentrated before HPLC separation. Product-containing fractions were pooled and lyophilized for characterization and next step use. Pd26ST-catalyzed reactions give 89-94% yields (HPLC purified glycan product/starting glycan substrate  $\times$  100%).

### **D) $\alpha$ 1,3-fucosylation catalyzed by Hp3FT**

Reaction mixtures contain Tris-HCl (100 mM, pH 7.5), an acceptor glycan (10 mM), GDP-Fuc (15 mM), MgCl<sub>2</sub> (10 mM), and appropriate amount of Hp3FT. Reactions were incubated at 37 °C overnight and were monitored by HPLC and/or MALDI-TOF. After over 90% acceptor was converted, reactions were quenched, concentrated before HPLC separation. Product-containing fractions were pooled and lyophilized for characterization and next step use. Hp3FT-catalyzed reactions give 85-86% yields (HPLC purified glycan product/starting glycan substrate  $\times$  100%).

### **E) GlcAT-P-catalyzed addition of GlcA**

The reaction mixture contains Tris-HCl (100 mM, pH 7.5), **M101** (10 mM), UDP-GlcA (15 mM), MgCl<sub>2</sub> (10 mM), and appropriate amount of GlcAT-P cell lysis. Reaction was incubated at 37 °C overnight. The reaction was monitored by HPLC until 90% M101 was converted. The reaction

was then quenched and concentrated for HPLC separation. Product-containing fractions were pooled and lyophilized for characterization. The reaction gives a yield of 90% (HPLC purified glycan product/starting glycan substrate  $\times$  100%).

### F) $\beta$ -galactosidase-catalyzed reaction

The reaction was performed according to the instruction using commercial  $\beta$ -galactosidase in the presence of **M201**. The reaction was monitored and product was purified by HPLC. The reaction gives a yield of 96% (HPLC purified glycan product/starting glycan substrate  $\times$  100%)

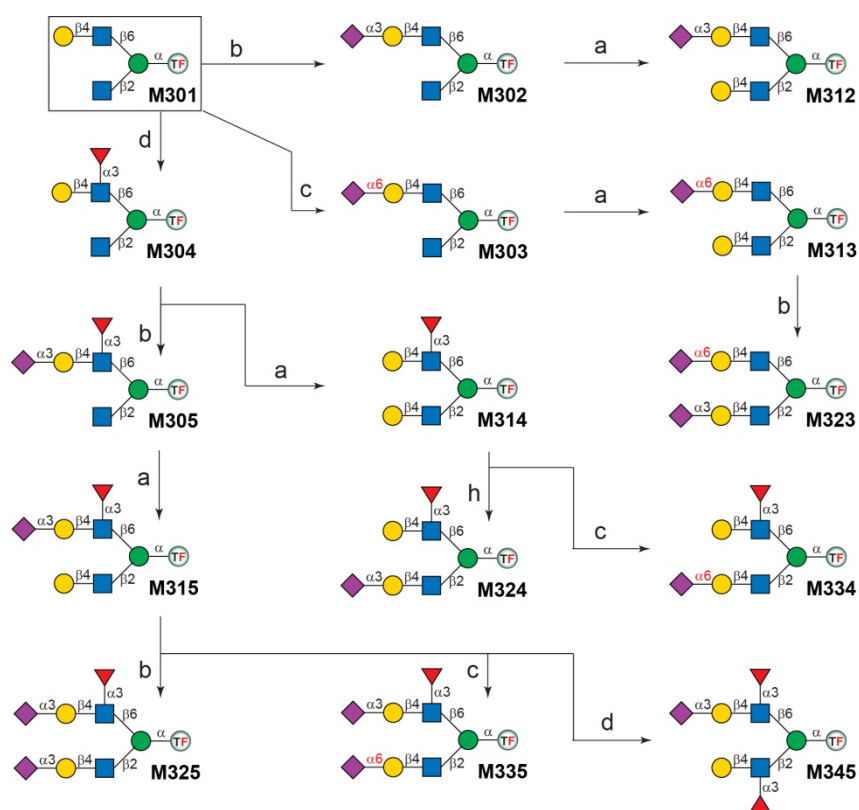

**Figure S1.** Enzymatic extension of M301 to generate core M2 O-mannosyl glycans. (a) NmLgtB, UDP-Gal,  $Mg^{2+}$ ; (b) PmST1-M144D, NmCSS, Neu5Ac, CTP,  $Mg^{2+}$ ; (c) Pd26ST, NmCSS, Neu5Ac, CTP,  $Mg^{2+}$ ; (d) Hp3FT, GDP-Fuc,  $Mg^{2+}$ ; (h) PmST1m, NmCSS, Neu5Ac, CTP,  $Mg^{2+}$ .

### III. Glycan Microarray preparation, assay and data

#### A) Method for removing Fmoc

O-mannosyl glycans (50 ug) were dissolved in 200 uL H<sub>2</sub>O, and 30 uL triethylamine was added to remove the Fmoc group at room temperature for 4 h. The reactions were then lyophilized and hexane extraction was used to remove free Fmoc.

#### B) Method for microarray preparation

O-mannosyl glycans microarray was prepared as previously reported,<sup>[13]</sup> briefly, 8 subarrays was printed on N-hydroxysuccinimide (NHS)-derivatized slides by Z Biotech (Aurora, CO, USA). Within each subarray, each glycan was printed in six replicates with print buffer, and print buffer was also printed as a negative control. In addition, Biotin-PEG2-Amine (0.01 mg/mL) (positive control 1), Rabbit IgG (0.1 mg/mL) (positive control 2) were printed in six replicates with print buffer to serve as a positive control. A marker containing human IgG conjugate with Cy3 (0.01 mg/mL) and human IgG conjugate with Alexa 647 (0.01 mg/mL) was also printed in the replicates of six.

#### C) Method for microarray assay

**Materials:** All biotinylated lectins were purchased from EY Labs (San Mateo, CA). Cy5-streptavidin, Cy3-streptavidin, goat anti-rabbit IgG-Alexa Fluor 647 conjugate, goat anti-mouse IgG-Alexa Fluor 647 conjugate were purchased from ThermoFisher Scientific (Waltham, MA). Mouse anti-human CD15s (sialyl-lewis X) antibody was purchased from BD Biosciences (Franklin Lakes, NJ). Mab(IIH6) was a kind gift from Dr. Kevin Campbell (HHMI, University of Iowa).<sup>[15]</sup>

**Procedures:** Microarray slides were rehydrated for 30 min in blocking buffer (50 mM ethanolamine in 50 mM sodium borate, pH 9.2) and wash with H<sub>2</sub>O before assay. All assay were performed as previously reported.<sup>[13]</sup> Plant lectins, including Concanavalin A from *Canavalia ensiformis* (Con A, 10 µg/mL), *Aleuria aurantia* lectin (AAL, 10 µg/mL), *Ricinus Communis* lectin I (RCA-I, 10 µg/mL), *Erythrina cristagalli* Lectin (ECA, 10 µg/mL) were applied with appropriate concentrations, and detected by Cy3-streptavidin or Cy5-streptavidin (1 µg/mL). Anti-CD15s antibody (10 µg/mL), and IIH6 antibody (1:200 dilution) antibody were also tested. The primary antibodies were bound by goat anti-mouse IgG-Alexa Fluor 647 conjugate (5 µg/mL). Twelve subarrays were assayed with rabbit serums from Dr. Ulrika Westerlind. Goat anti-rabbit IgG-Alexa Fluor 647 conjugate (5 µg/mL) was used to bound with the primary antibodies. After binding, the slides were scanned with a microarray scanner (GenePix 4000B).

#### D) Results and analysis

Firstly, binding specificities *Aleuria aurantia* lectin (AAL, specific to  $\alpha$ -linked Fuc) was profiled. As shown in Figure S2, AAL bound to all O-mannosyl glycans with an  $\alpha$ 1,3-linked Fuc residue (**Fig 6A**). Meanwhile, weaker bindings were observed towards **M3X4** and **M3X5** (contain one Fuc on the  $\beta$ 1,6-branch) than **M2X4** and **M2X5** (contain one Fuc on the  $\beta$ 1,2-branch) with the exception of **M345** and **M245** (contain Fuc residues on both branches), indicating AAL possesses a branch preference towards the  $\beta$ 1,2-branch. In addition, AAL showed higher bindings to glycans that contain the Le<sup>X</sup> epitope (e.g., **M104**, **M040**, **M204**,

**M214, M304, M314**) than those contain the sLe<sup>x</sup> epitope (e.g., **M105, M050, M205, M215, M305, M315**), suggesting a same-chain glycosylation ( $\alpha$ 2,3-sialylation) influence. Besides ECA and RCA-I's branch preferences, When comparing binding specificities of RCA-I towards **M212, M213, M214** and **M215**, a series of glycans with the same  $\beta$ 1,6-branch (LN disaccharide) but differs in the  $\beta$ 1,2-branch, an apparent preference of **M213>M214>M215>M212** was observed, suggesting a side-chain influence on RCA-I binding. Such influences were also found for ECA (**Fig 6A**) and AAL (**Fig S2**, varied bindings to **M104, M204, M214, M224, M234**), but in different orders.

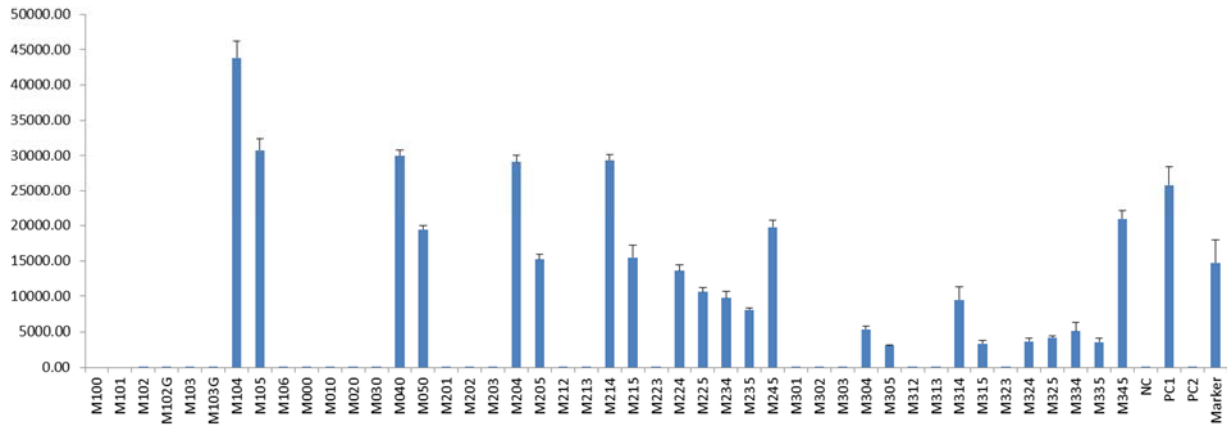

**Figure S2.** Microarray analysis and binding profile of O-mannosyl glycans towards *Aleuria aurantia* lectin (AAL, 10  $\mu$ g/mL), Cy5- streptavidin was used to detect binding.

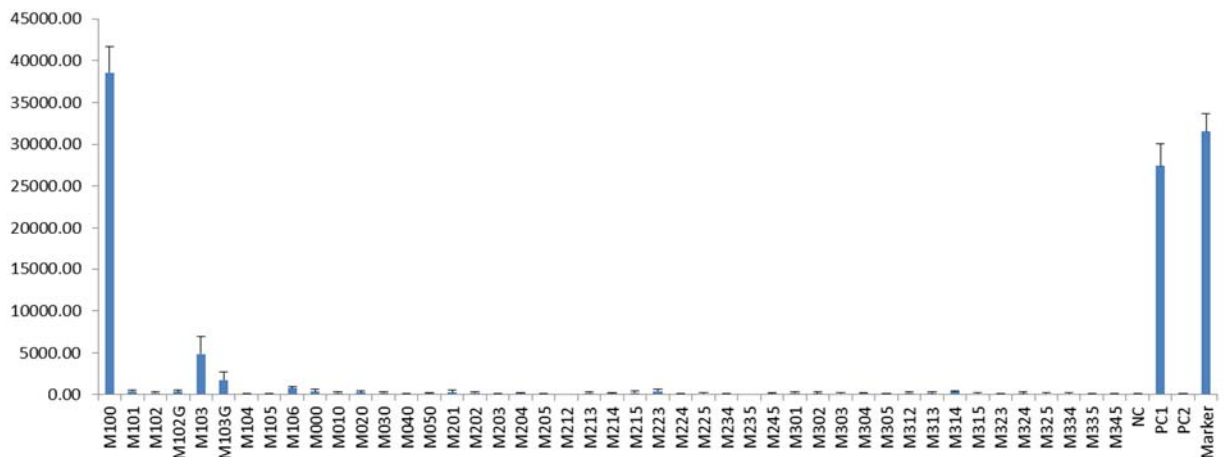

**Figure S3.** Microarray analysis and binding profile of O-mannosyl glycans towards Concanavalin A from *Canavalia ensiformis* (Con A, 10  $\mu$ g/mL), Cy5- streptavidin was used to detect binding.

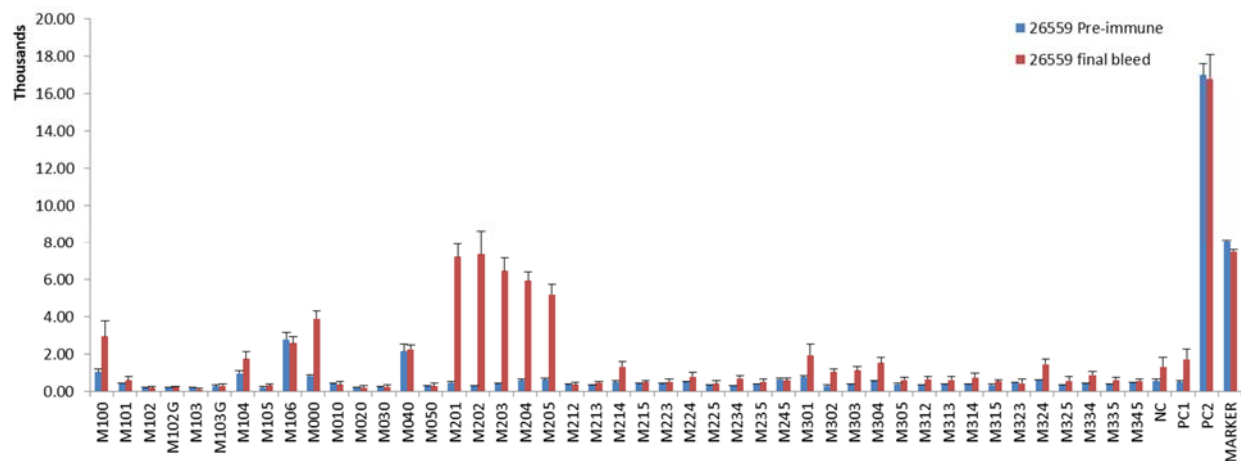

**Figure S4.** Microarray analysis and binding profile of O-mannosyl glycans towards rabbit 26559 anti-core M2 trisaccharide containing glycoconjugate antiserum (1:25), goat anti-rabbit IgG-Alexa Fluor 647 conjugate was used to detect binding.

As expected, a  $\alpha$ -DG antibody (IIH6) failed to bind any core M1 and branched core M2 structures (**Fig S5**), as it is specific for core M3 glycans.<sup>[15]</sup>

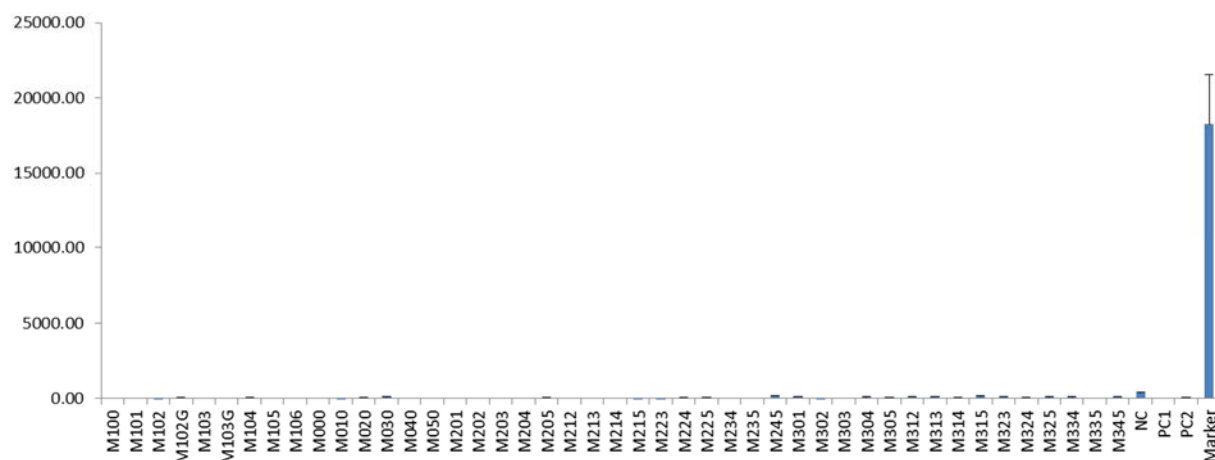

**Figure S5.** Microarray analysis and binding profile of O-mannosyl glycans towards mouse IIH6 antibody (1:200 dilution), goat anti-mouse IgG-Alexa Fluor 647 conjugate was used to detect binding.

#### IV. HPLC, MS and NMR analysis of purified O-mannosyl glycans

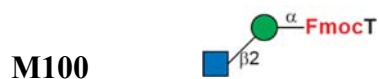

HPLC-FL,  $T_R = 23.47$  min

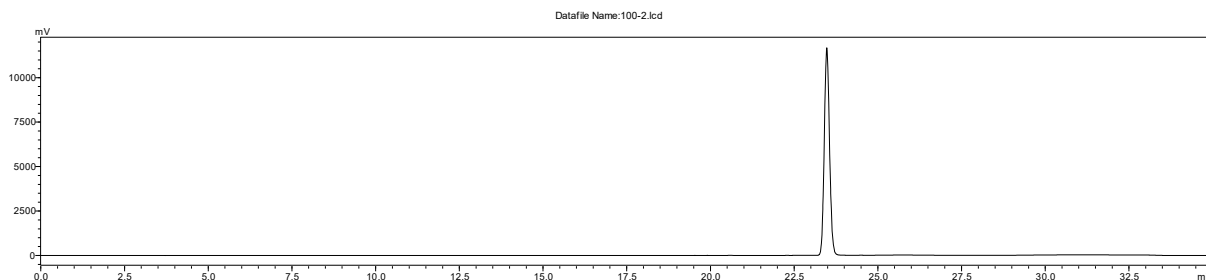

ESI-MS, calculated: 706.2585; found  $[M-H]^-$  705.2470

100\_180203124647 #69-151 RT: 1.48-3.27 AV: 83 NL: 1.38E5  
T: FTMS - p ESI Full ms [100.00-2000.00]

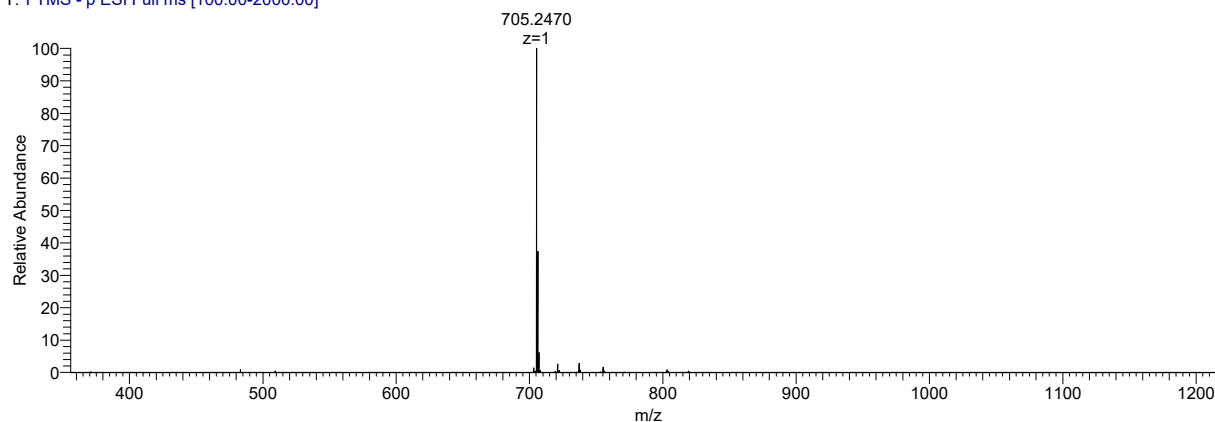

$^1\text{H}$  NMR (400 MHz,  $\text{D}_2\text{O}$ )  $\delta$  7.74 – 7.60 (m, 2H), 7.60 – 7.40 (m, 2H), 7.40 – 7.18 (m, 4H), 4.60 (dd,  $J = 10.7, 4.9$  Hz, 1H), 4.42 – 4.27 (m, 2H), 4.23 (d,  $J = 6.3$  Hz, 1H), 4.12 – 3.96 (m, 1H), 3.83 – 3.71 (m, 4H), 3.71 – 3.42 (m, 7H), 3.42 – 3.30 (m, 3H), 3.27 (s, 1H), 1.96 (s, 3H), 0.94 (d,  $J = 6.1$  Hz, 3H);  $^{13}\text{C}$  NMR (100 MHz,  $\text{D}_2\text{O}$ )  $\delta$  174.87, 158.05, 143.91, 143.49, 140.96, 140.91, 127.96, 127.41, 124.90, 124.78, 120.09, 100.01, 98.04, 77.19, 75.59, 73.28, 73.05, 69.84, 69.26, 67.22, 65.92, 61.60, 60.52, 55.26, 47.10, 22.35, 18.33; MALDI-MS:  $[\text{C}_{33}\text{H}_{42}\text{N}_2\text{O}_{15}\text{Na}]^+$  calculated for 729.2483, found 729.2478  $\text{M}+\text{Na}^+$

M101

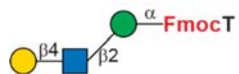

HPLC-FL,  $T_R = 21.82$  min

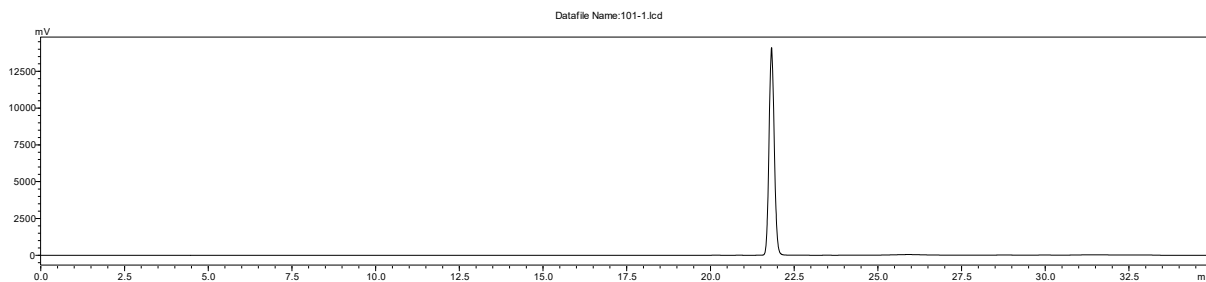

ESI-MS, calculated: 868.3113; found  $[M-H]^-$  867.2972

MALDI-MS, found  $[M+Na]^+$  891.305,  $[M+K]^+$  907.279

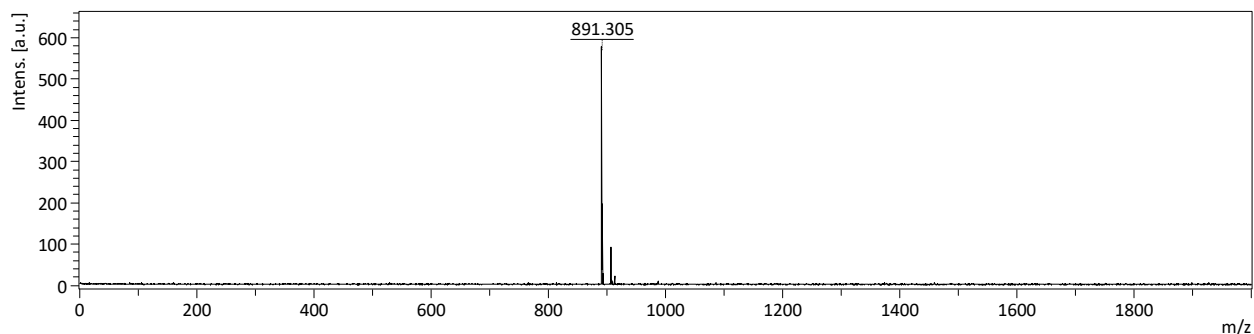

$^1H$  NMR (600 MHz,  $D_2O$ )  $\delta$  7.71 – 7.55 (m, 2H), 7.71 – 7.55 (m, 2H), 7.51 – 7.29 (m, 4H), 4.77 (d,  $J = 4.9$  Hz, 1H), 4.75 (d,  $J = 4.8$  Hz, 1H), 4.65 (m, 1H), 4.63 (m, 1H), 4.57 (dd,  $J = 11.0, 4.6$  Hz, 1H), 4.38 (d,  $J = 7.8$  Hz, 1H), 4.35 (d,  $J = 5.5$  Hz, 1H), 4.29 – 4.20 (m, 2H), 3.95 (d,  $J = 2.1$  Hz, 1H), 3.86 (m, 2H), 3.81 – 3.57 (m, 10H), 3.57 – 3.42 (m, 4H), 3.38 (t,  $J = 9.7$  Hz, 1H), 1.96 (s, 3H), 0.96 (d,  $J = 6.4$  Hz, 3H).

M102

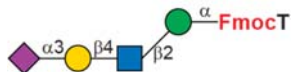

HPLC-FL,  $T_R = 20.26$  min

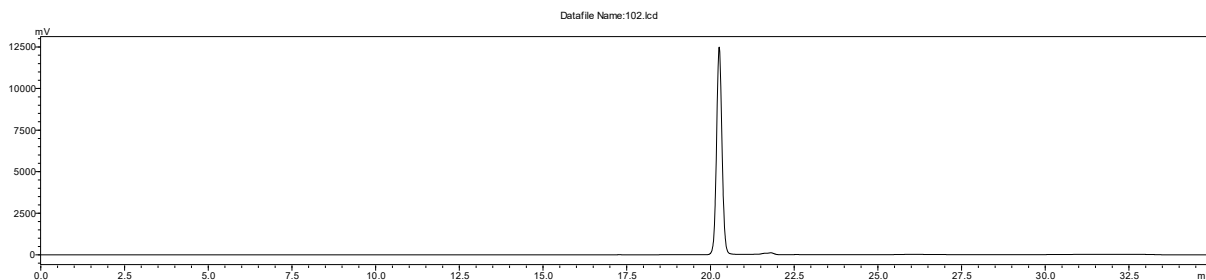

ESI-MS, calculated: 1159.4068; found  $[M-H]^-$  1158.3877

102-SHUAI #70-153 RT: 1.48-3.27 AV: 84 NL: 3.31E5  
T: FTMS - p ESI Full ms [100.00-2000.00]

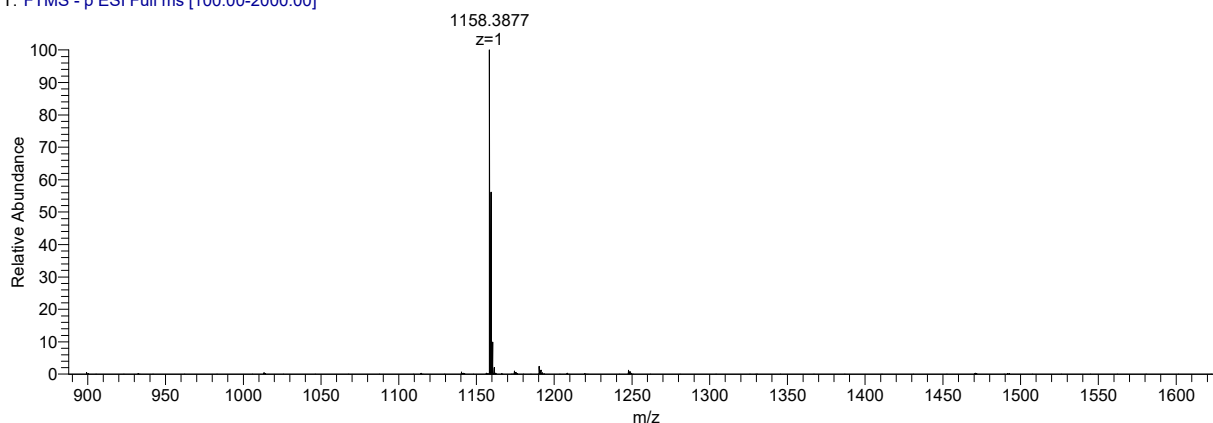

$^1\text{H}$  NMR (600 MHz,  $\text{D}_2\text{O}$ )  $\delta$  7.90 – 7.73 (m, 2H), 7.71 – 7.50 (m, 2H), 7.45 – 7.25 (m, 4H), 4.65 (s, 1H), 4.59 (s, 1H), 4.54 (dd,  $J = 11.0, 4.6$  Hz, 1H), 4.41 (d,  $J = 7.8$  Hz, 1H), 4.30 (d,  $J = 7.1$  Hz, 1H), 4.23 (s, 1H), 4.17 (d,  $J = 5.6$  Hz, 1H), 4.00 (d,  $J = 12.5$  Hz, 1H), 3.89 – 3.66 (m, 8H), 3.65 – 3.36 (m, 16H), 3.32 (t,  $J = 9.6$  Hz, 1H), 2.64 (dd,  $J = 12.4, 4.4$  Hz, 1H), 1.91 (s, 3H), 1.90 (s, 3H), 1.69 (t,  $J = 12.1$  Hz, 1H), 0.91 (d,  $J = 6.2$  Hz, 3H).



**M102G**

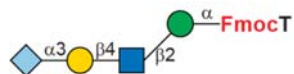

HPLC-FL,  $T_R = 19.97$  min

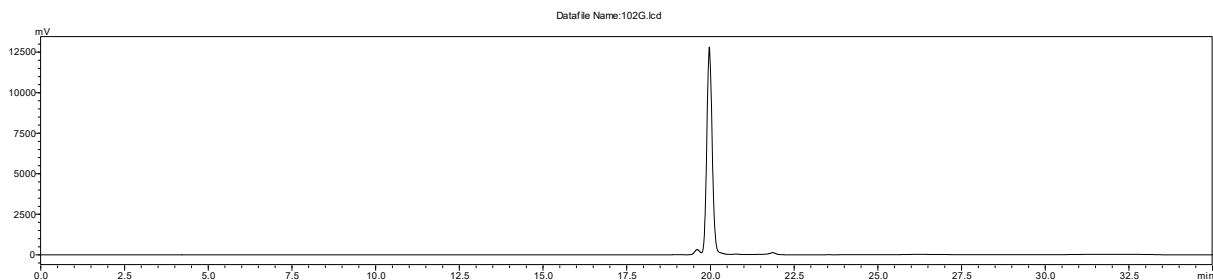

ESI-MS, calculated: 1175.4017; found  $[M-H]^-$  1174.3850

MALDI-MS, found  $[M+Na]^+$  1198.394,  $[M+K]^+$  1214.375

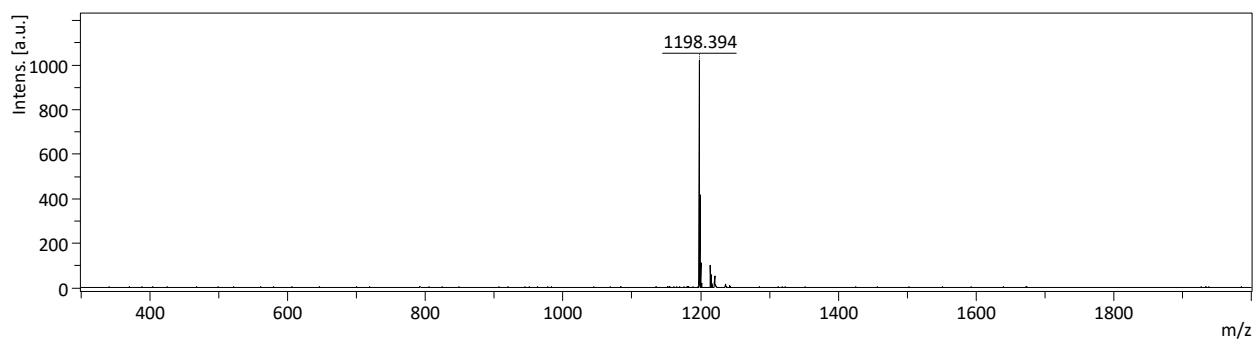

$^1H$  NMR (600 MHz,  $D_2O$ )  $\delta$  7.86 – 7.73 (m, 2H), 7.67 – 7.49 (m, 2H), 7.41 – 7.25 (m, 4H), 4.64 – 4.60 (m, 1H), 4.57 – 4.50 (m, 1H), 4.40 (d,  $J = 8.0$  Hz, 1H), 4.28 (d,  $J = 6.7$  Hz, 1H), 4.23 (s, 2H), 4.17 (d,  $J = 6.7$  Hz, 1H), 4.03 – 3.97 (m, 3H), 3.94 (s, 1H), 3.86 – 3.35 (m, 24H), 3.31 (t,  $J = 9.7$  Hz, 1H), 2.64 (d,  $J = 8.4$  Hz, 1H), 1.88 (s, 3H), 1.69 (t,  $J = 12.1$  Hz, 1H), 0.90 (d,  $J = 6.2$  Hz, 3H).

M103

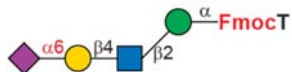

HPLC-FL,  $T_R = 20.14$  min

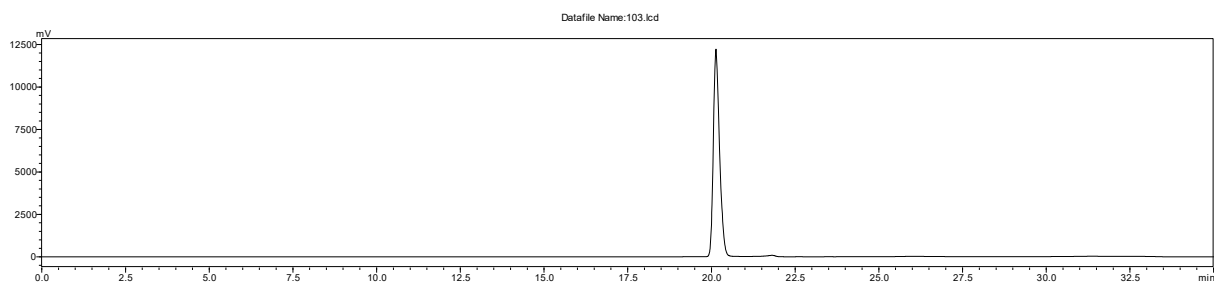

ESI-MS, calculated: 1159.4068; found  $[M-H]^-$  1158.3878

103-SHUAI #71-154 RT: 1.47-3.28 AV: 84 NL: 5.44E5  
T: FTMS - p ESI Full ms [100.00-2000.00]

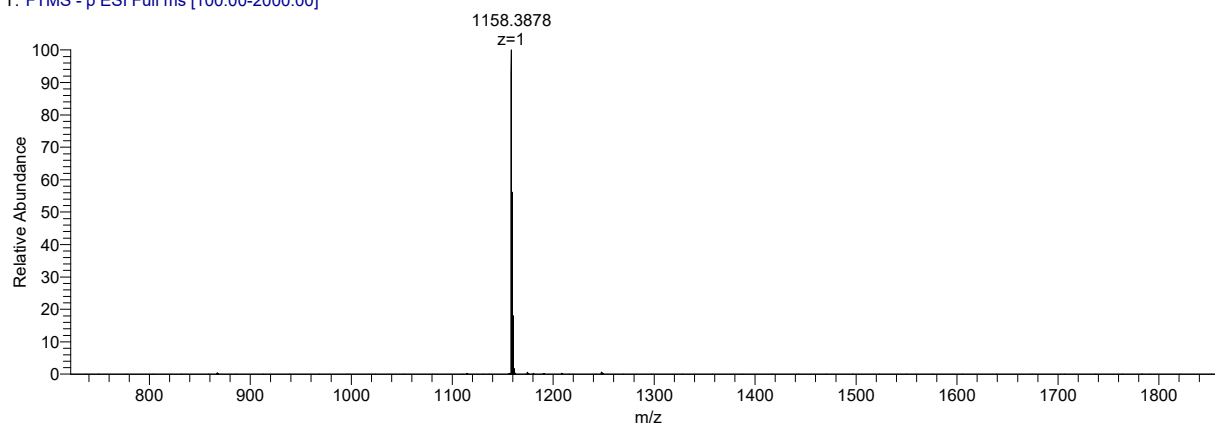

$^1\text{H}$  NMR (600 MHz,  $\text{D}_2\text{O}$ )  $\delta$  7.83 – 7.72 (m, 2H), 7.63 – 7.49 (m, 2H), 7.42 – 7.25 (m, 4H), 4.69 (s, 1H), 4.68 (s, 1H), 4.53 (dd,  $J = 11.0, 3.4$  Hz, 1H), 4.35 – 4.25 (m, 2H), 4.20 (s, 2H), 4.02 (s, 1H), 3.89 (t,  $J = 9.4$  Hz, 1H), 3.86 – 3.67 (m, 7H), 3.67 – 3.37 (m, 15H), 3.34 (t,  $J = 9.4$  Hz, 1H), 2.53 (d,  $J = 8.7$  Hz, 1H), 1.92 (s, 3H), 1.91 (s, 3H), 1.64 (t,  $J = 12.2$  Hz, 1H), 0.92 (d,  $J = 6.0$  Hz, 3H).

**M103G**

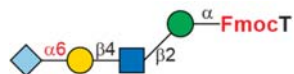

HPLC-FL,  $T_R = 19.59$  min

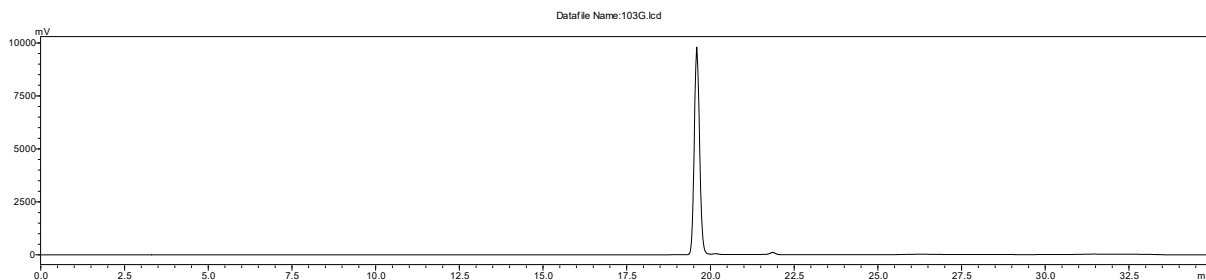

ESI-MS, calculated: 1175.4017; found  $[M-H]^-$  1174.3792

MALDI-MS, found  $[M+Na]^+$  1198.391,  $[M+K]^+$  1214.372

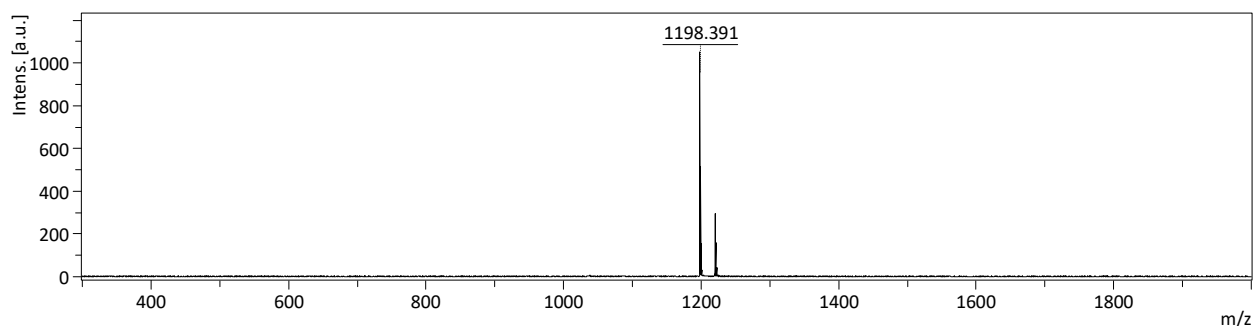

$^1H$  NMR (600 MHz,  $D_2O$ )  $\delta$  7.89 – 7.74 (m, 2H), 7.71 – 7.53 (m, 2H), 7.49 – 7.29 (m, 4H), 4.74 (s, 1H), 4.67 – 4.60 (m, 1H), 4.62 – 4.54 (m, 1H), 4.40 – 4.30 (m, 2H), 4.24 (d,  $J = 5.1$  Hz, 2H), 4.08 (s, 1H), 4.04 (s, 2H), 3.95 (t,  $J = 9.5$  Hz, 1H), 3.89 – 3.71 (m, 10H), 3.71 – 3.34 (m, 14H), 2.59 (dd,  $J = 12.5, 4.4$  Hz, 1H), 2.03 – 1.93 (m, 3H), 1.70 (t,  $J = 12.2$  Hz, 1H), 0.97 (d,  $J = 6.4$  Hz, 3H).

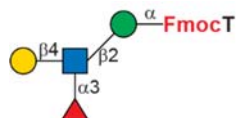

**M104**

HPLC-FL,  $T_R = 20.73$  min

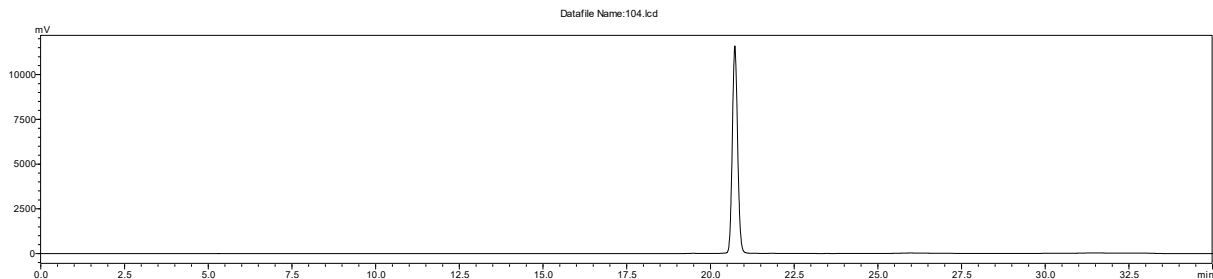

ESI-MS, calculated: 1014.3693; found  $[M-H]^-$  1013.3524

M104 #69-151 RT: 1.48-3.27 AV: 83 NL: 6.30E4  
T: FTMS - p ESI Full ms [100.00-2000.00]

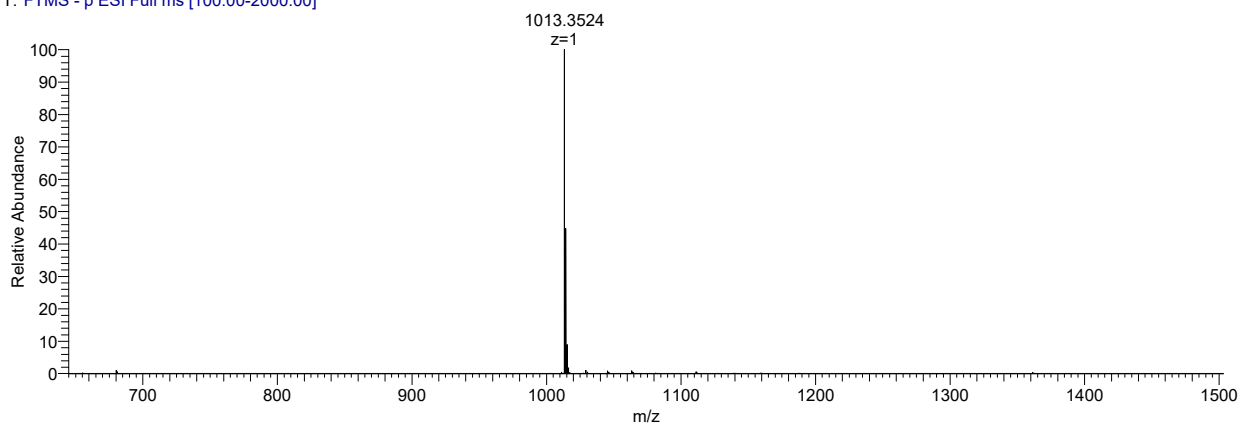

$^1\text{H}$  NMR (600 MHz,  $\text{D}_2\text{O}$ )  $\delta$  7.83 – 7.60 (m, 2H), 7.60 – 7.40 (m, 2H), 7.38 – 7.18 (m, 4H), 5.04 (d,  $J = 3.8$  Hz, 1H), 4.76 (d,  $J = 6.8$  Hz, 1H), 4.64 – 4.54 (m, 1H), 4.43 (s, 1H), 4.36 (d,  $J = 7.6$  Hz, 2H), 4.25 (s, 1H), 4.12 (s, 1H), 4.05 (s, 1H), 3.90 – 3.70 (m, 9H), 3.70 – 3.32 (m, 11H), 1.94 (s, 3H), 1.11 (d,  $J = 6.2$  Hz, 3H), 0.98 (d,  $J = 5.8$  Hz, 3H).

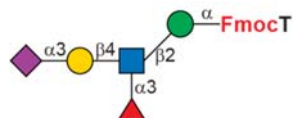

**M105**

HPLC-FL,  $T_R = 18.99$  min

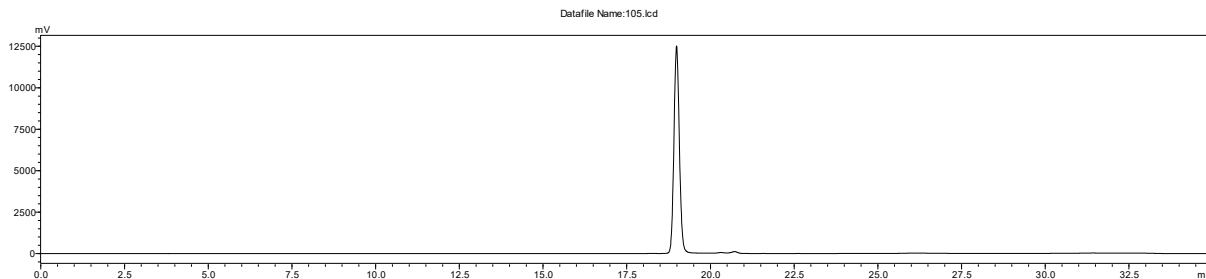

ESI-MS, calculated: 1305.4647; found  $[M-H]^-$  1304.4440

105-SHUAI #69-151 RT: 1.48-3.27 AV: 83 NL: 1.21E5  
T: FTMS - p ESI Full ms [100.00-2000.00]

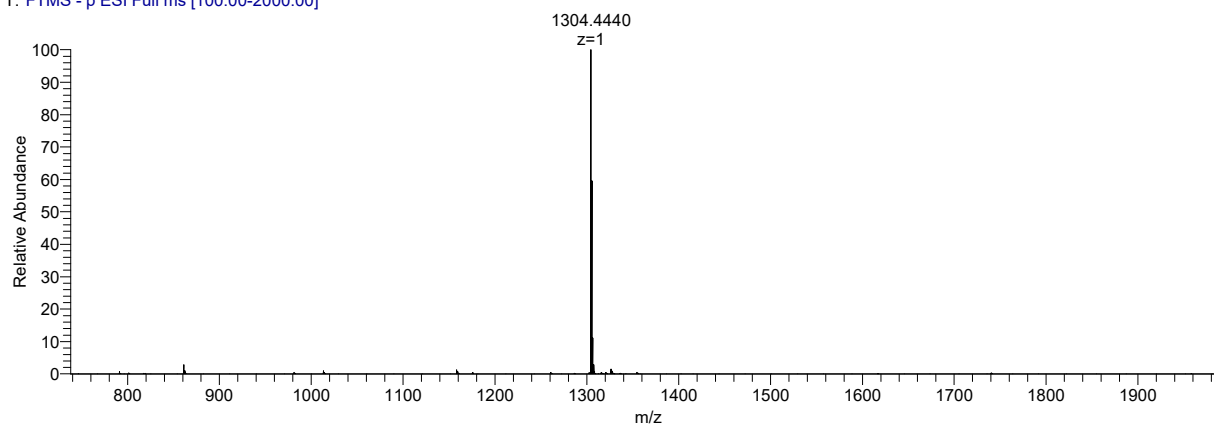

$^1\text{H}$  NMR (600 MHz,  $\text{D}_2\text{O}$ )  $\delta$  7.85 – 7.73 (m, 2H), 7.68 – 7.48 (m, 2H), 7.42 – 7.23 (m, 4H), 4.96 (d,  $J = 3.2$  Hz, 1H), 4.65 (s, 1H), 4.64 (s, 1H), 4.53 (dd,  $J = 10.9, 4.5$  Hz, 2H), 4.36 (d,  $J = 7.9$  Hz, 1H), 4.28 (d,  $J = 8.0$  Hz, 1H), 4.25 – 4.14 (m, 2H), 4.00 – 3.88 (m, 2H), 3.87 – 3.60 (m, 13H), 3.60 – 3.34 (m, 14H), 3.28 (t,  $J = 9.6$  Hz, 1H), 2.62 (d,  $J = 8.0$  Hz, 1H), 1.89 (s, 3H), 1.88 (s, 3H), 1.67 (t,  $J = 12.1$  Hz, 1H), 1.03 (d,  $J = 6.2$  Hz, 3H), 0.90 (d,  $J = 6.1$  Hz, 3H).

M106

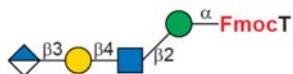

HPLC-FL,  $T_R = 20.87$  min

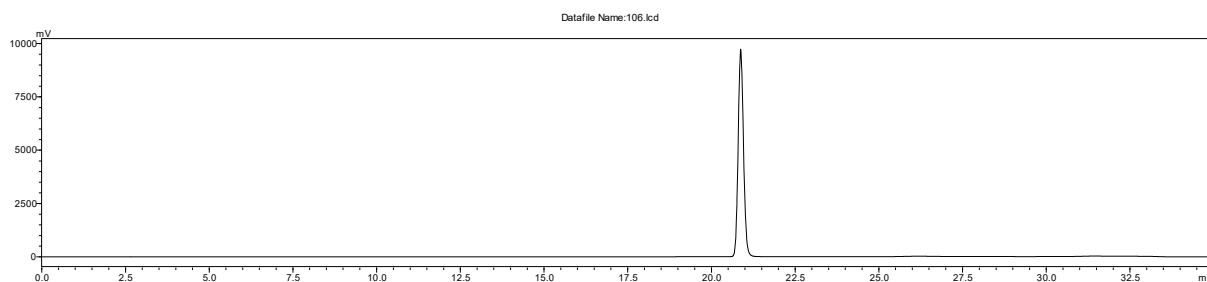

ESI-MS, calculated: 1044.3434; found  $[M-H]^-$  1043.3264

106-SHUAI #69-151 RT: 1.48-3.27 AV: 83 NL: 1.50E4  
T: FTMS - p ESI Full ms [100.00-2000.00]

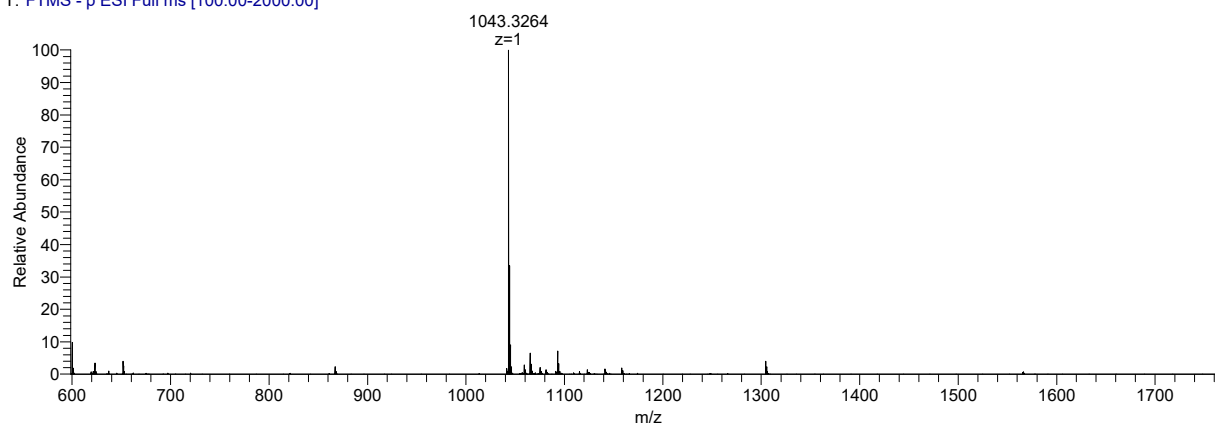

$^1H$  NMR (600 MHz,  $D_2O$ )  $\delta$  7.84 – 7.64 (m, 2H), 7.64 – 7.44 (m, 2H), 7.41 – 7.19 (m, 4H), 4.65 (s, 1H), 4.58 (d,  $J = 7.9$  Hz, 1H), 4.50 (dd,  $J = 11.0, 4.7$  Hz, 1H), 4.36 (d,  $J = 7.8$  Hz, 1H), 4.32 – 4.23 (m, 1H), 4.22 – 4.12 (m, 2H), 4.02 (d,  $J = 2.9$  Hz, 1H), 3.92 (d,  $J = 2.1$  Hz, 1H), 3.83 – 3.51 (m, 15H), 3.51 – 3.36 (m, 5H), 3.36 – 3.24 (m, 2H), 1.88 (s, 3H), 0.90 (d,  $J = 6.3$  Hz, 3H).

**M000**

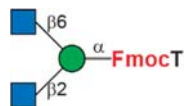

HPLC-FL,  $T_R = 18.20$  min

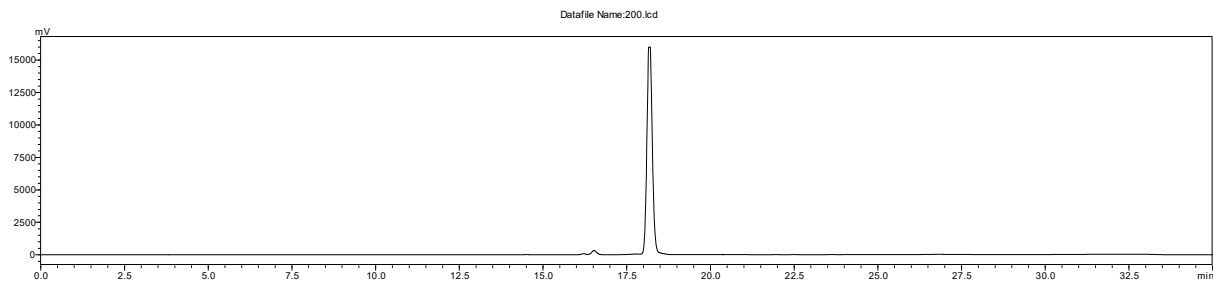

ESI-MS, calculated: 909.3379; found  $[M-H]^-$  908.3226

MALDI-MS, found  $[M+Na]^+$  932.324,  $[M+K]^+$  948.318

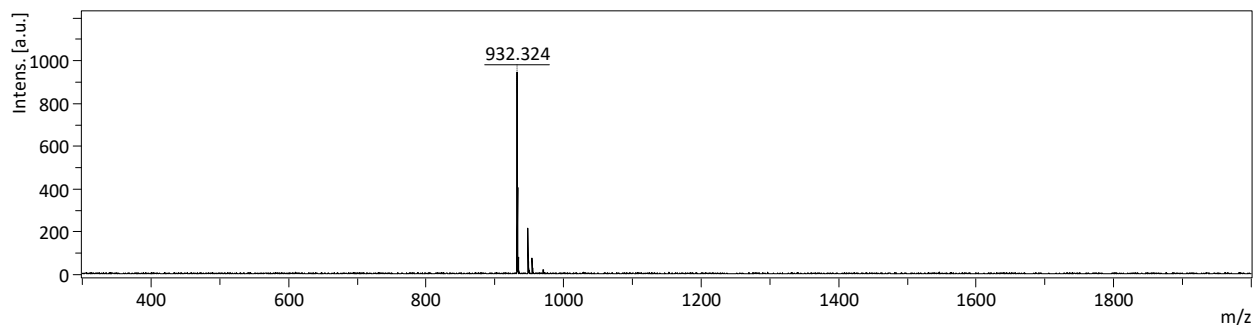

$^1H$  NMR (600 MHz,  $D_2O$ )  $\delta$  7.94 – 7.79 (m, 2H), 7.71 – 7.54 (m, 2H), 7.50 – 7.29 (m, 4H), 4.76 (dd,  $J = 10.8, 4.9$  Hz, 1H), 4.67 (s, 1H), 4.56 (dd,  $J = 11.0, 4.7$  Hz, 1H), 4.47 (d,  $J = 8.5$  Hz, 1H), 4.34 (d,  $J = 8.3$  Hz, 1H), 4.27 (s, 1H), 4.18 (d,  $J = 6.1$  Hz, 1H), 4.12 (d,  $J = 10.4$  Hz, 1H), 4.01 (s, 1H), 3.86 (d,  $J = 12.3$  Hz, 1H), 3.80 (d,  $J = 10.9$  Hz, 1H), 3.75 – 3.43 (m, 10H), 3.43 – 3.24 (m, 5H), 1.96 (s, 3H), 1.94 (s, 3H), 0.96 (d,  $J = 6.4$  Hz, 3H).

**M010**

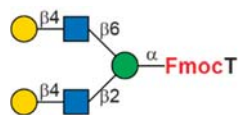

HPLC-UV<sub>260nm</sub>, T<sub>R</sub> = 14.61 min

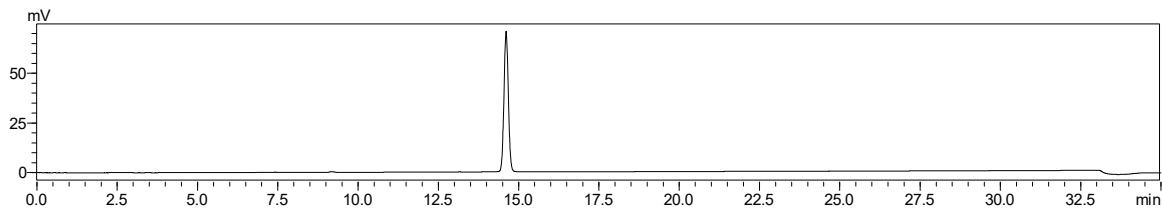

ESI-MS, calculated: 1233.4435; found [M+H]<sup>+</sup> 1234.4497, [M+Na]<sup>+</sup> 1256.4307

210\_171125160701 #104-229 RT: 1.47-3.27 AV: 126 NL: 8.32E5  
T: FTMS + p ESI Full ms [100.00-2000.00]

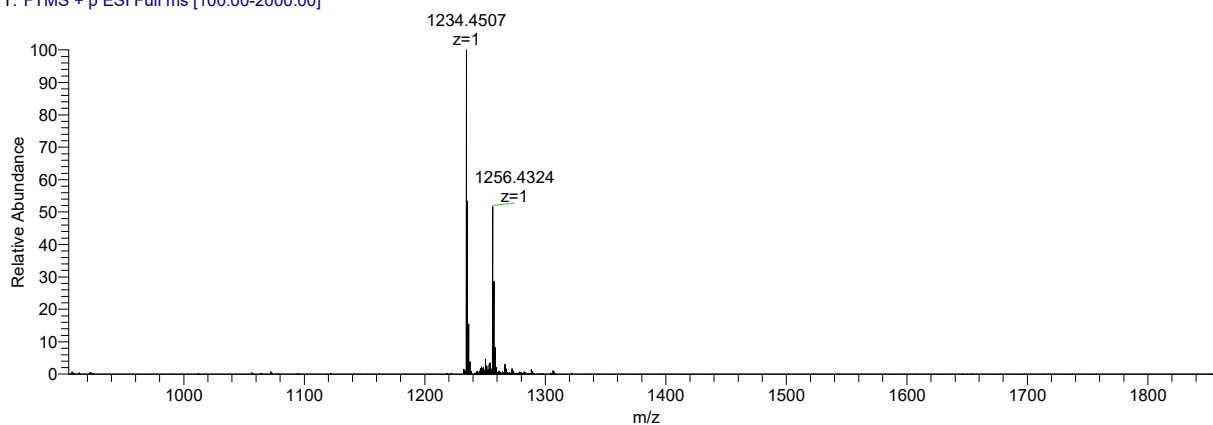

<sup>1</sup>H NMR (600 MHz, D<sub>2</sub>O) δ 7.91 – 7.72 (m, 2H), 7.72 – 7.49 (m, 2H), 7.49 – 7.27 (m, 4H), 4.74 (d, *J* = 3.3 Hz, 1H), 4.66 (d, *J* = 4.5 Hz, 1H), 4.60 – 4.51 (m, 1H), 4.51 – 4.43 (m, 2H), 4.41 – 4.35 (m, 2H), 4.34 – 4.24 (m, 2H), 4.20 (d, *J* = 5.8 Hz, 2H), 4.11 (d, *J* = 10.8 Hz, 1H), 4.03 (d, *J* = 14.8 Hz, 1H), 4.00 – 3.79 (m, 4H), 3.79 – 3.39 (m, 21H), 3.31 (t, *J* = 10.0 Hz, 1H), 1.96 (s, 3H), 1.94 (s, 3H), 0.99 (d, *J* = 4.8 Hz, 3H).



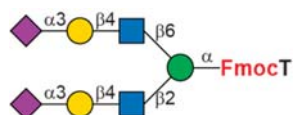

**M020**

HPLC-FL,  $T_R = 9.69$  min

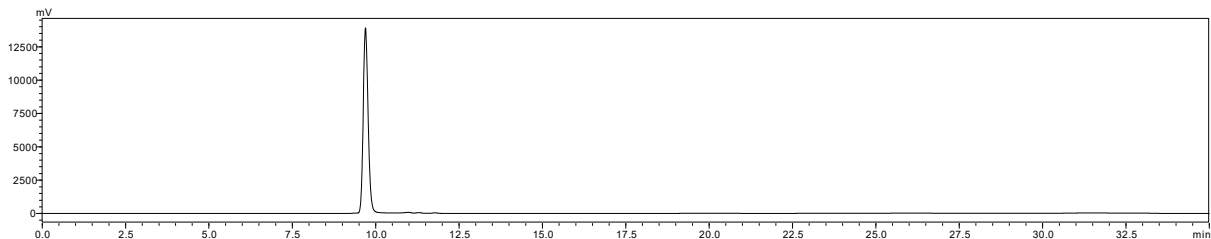

ESI-MS, calculated: 1815.6344; found  $[M-H]^-$  1814.6297,  $[M-2H]^{2-}$  906.8041

220\_180203143005 #69-152 RT: 1.48-3.27 AV: 84 NL: 5.77E4  
T: FTMS - p ESI Full ms [100.00-2000.00]

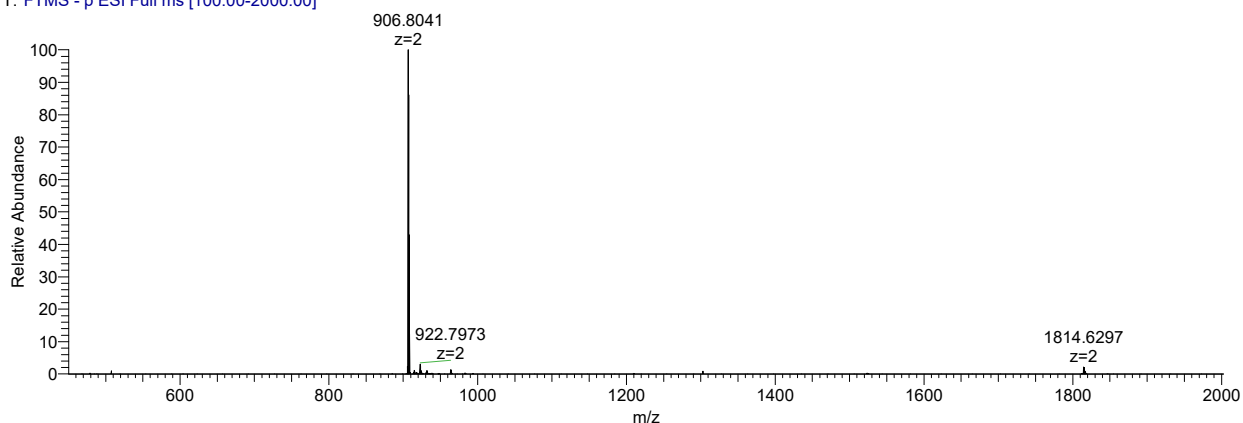

$^1H$  NMR (600 MHz,  $D_2O$ )  $\delta$  7.92 – 7.78 (m, 2H), 7.72 – 7.54 (m, 2H), 7.52 – 7.29 (m, 4H), 4.76 – 4.74 (m, 1H), 4.68 – 4.66 (m, 1H), 4.59 – 4.50 (m, 2H), 4.52 – 4.44 (m, 2H), 4.40 (d,  $J = 7.7$  Hz, 1H), 4.35 (d,  $J = 7.5$  Hz, 1H), 4.28 (s, 2H), 4.20 (d,  $J = 6.4$  Hz, 1H), 4.17 – 4.00 (m, 4H), 3.98 – 3.39 (m, 38H), 3.30 (t,  $J = 10.3$  Hz, 1H), 2.68 (dd,  $J = 12.6, 4.0$  Hz, 2H), 1.96 (s, 9xH), 1.92 (s, 3H), 1.78 (t,  $J = 12.5$  Hz, 2H), 0.99 (d,  $J = 6.1$  Hz, 3H).

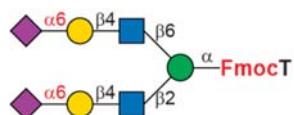

**M030**

HPLC-UV<sub>260nm</sub>, T<sub>R</sub> = 11.90 min

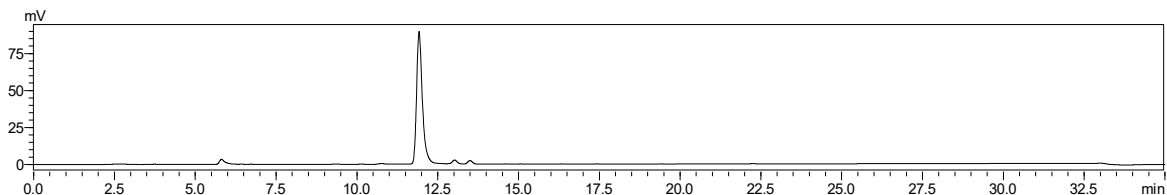

ESI-MS, calculated: 1815.6344; found [M-H]<sup>-</sup> 1814.6103, [M-2H]<sup>2-</sup> 906.7999

230\_171027045718 #69-151 RT: 1.48-3.28 AV: 83 NL: 8.38E3  
T: FTMS - p ESI Full ms [100.00-2000.00]

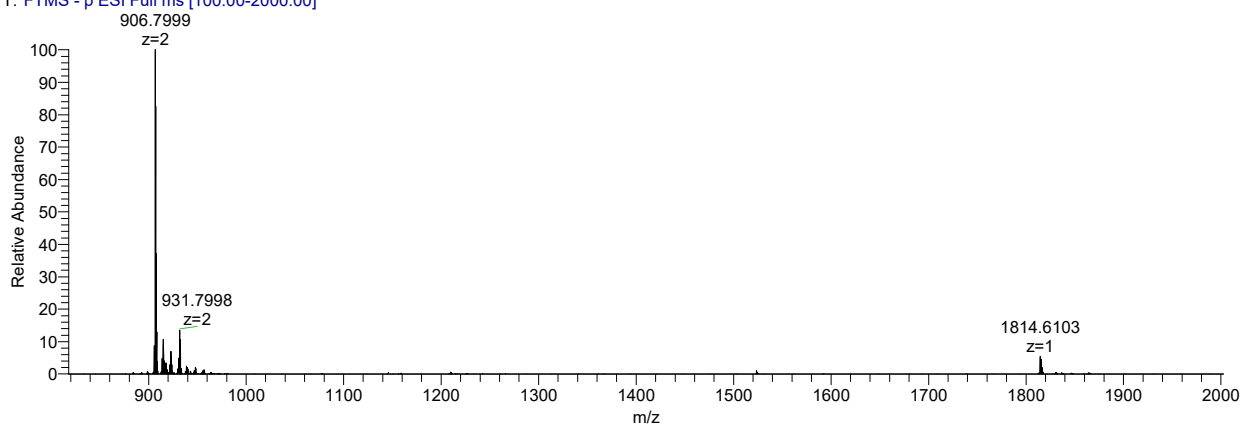

<sup>1</sup>H NMR (600 MHz, D<sub>2</sub>O) δ 7.90 – 7.78 (m, 2H), 7.71 – 7.54 (m, 2H), 7.50 – 7.29 (m, 4H), 4.62 – 4.53 (m, 1H), 4.50 (d, *J* = 8.4 Hz, 2H), 4.42 – 4.33 (m, 2H), 4.33 – 4.25 (m, 2H), 4.22 (d, *J* = 4.7 Hz, 1H), 4.17 – 4.05 (m, 2H), 4.00 – 3.42 (m, 40H), 3.31 (t, *J* = 9.8 Hz, 1H), 2.62 – 2.56 (m, 2H), 1.98 (s, 3H), 1.96 (s, 3H), 1.95 (s, 3H), 1.95 (s, 3H), 1.68 (t, *J* = 12.2 Hz, 2H), 1.00 (d, *J* = 6.4 Hz, 3H).

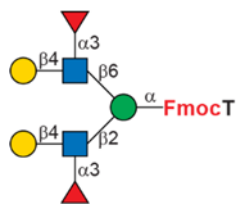

**M040**

HPLC-UV<sub>260nm</sub>, T<sub>R</sub> = 13.71 min

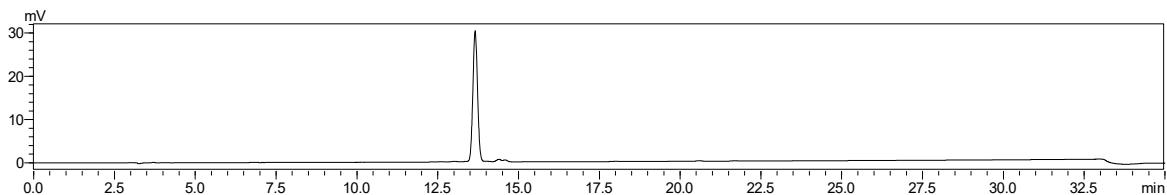

ESI-MS, calculated: 1525.5594; found [M-H]<sup>-</sup> 1524.5373

MALDI-MS, found [M+Na]<sup>+</sup> 1548.517, [M+K]<sup>+</sup> 1564.491

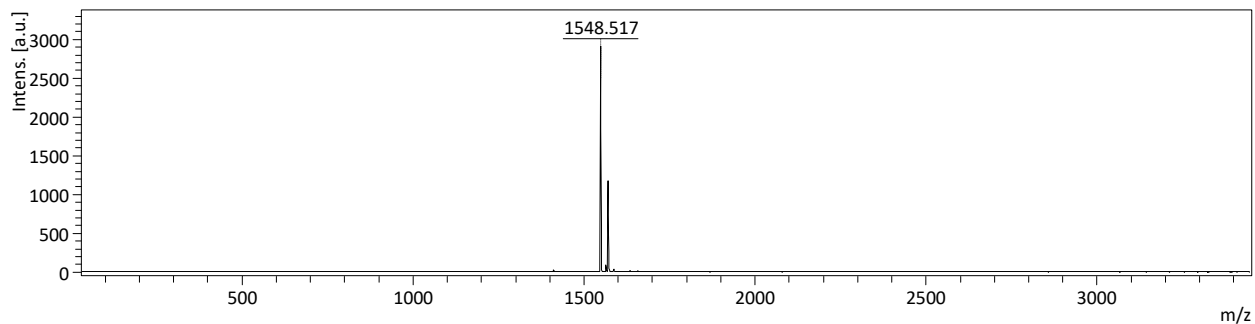

<sup>1</sup>H NMR (600 MHz, D<sub>2</sub>O) δ 7.71 – 7.54 (m, 2H), 7.54 – 7.32 (m, 2H), 7.23 (m, *J* = 31.1 Hz, 4H), 4.99 – 4.92 (m, 2H), 4.61 (d, *J* = 7.0 Hz, 1H), 4.48 (d, *J* = 9.1 Hz, 1H), 4.44 – 4.35 (m, 1H), 4.35 – 4.21 (m, 3H), 4.18 (d, *J* = 7.1 Hz, 1H), 4.14 (d, *J* = 5.5 Hz, 1H), 4.03 (d, *J* = 34.7 Hz, 3H), 3.90 – 3.16 (m, 35H), 1.88 (s, 3H), 1.85 (s, 3H), 1.08 – 0.98 (m, 6H), 0.93 (d, *J* = 5.0 Hz, 3H).

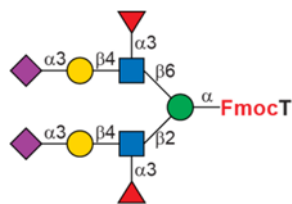

**M050**

HPLC-UV<sub>260nm</sub>, T<sub>R</sub> = 11.78 min

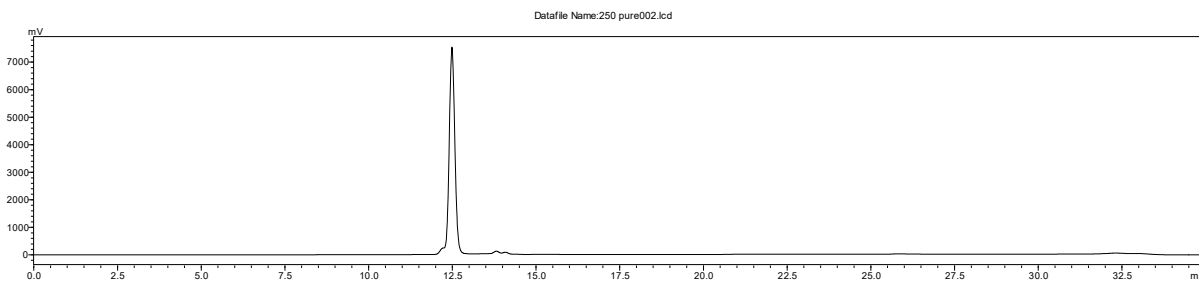

ESI-MS, calculated: 2107.7502; found [M-2H]<sup>2-</sup> 1052.8568

250\_171027051014 #69-151 RT: 1.48-3.28 AV: 83 NL: 8.35E3  
T: FTMS - p ESI Full ms [100.00-2000.00]

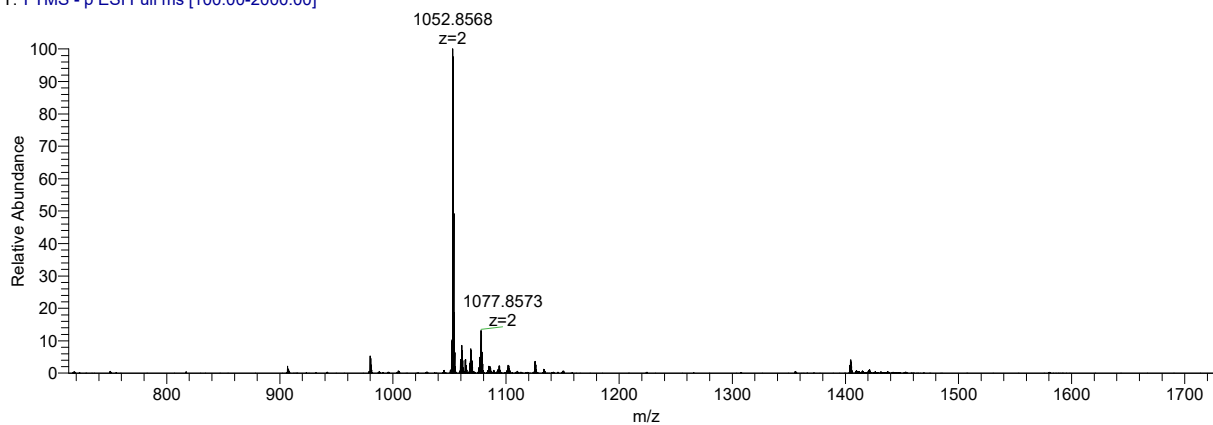

<sup>1</sup>H NMR (600 MHz, D<sub>2</sub>O) δ 7.87 – 7.72 (m, 2H), 7.67 – 7.48 (m, 2H), 7.44 – 7.26 (m, 4H), 5.00 – 4.91 (m, 2H), 4.64 – 4.63 (m, 1H), 4.62 – 4.58 (m, 2H), 4.54 – 4.46 (m, 2H), 4.46 – 4.35 (m, 3H), 4.35 – 4.27 (m, 2H), 4.23 (s, 2H), 4.14 (d, *J* = 5.5 Hz, 1H), 4.10 – 3.91 (m, 5H), 3.91 – 3.61 (m, 21H), 3.61 – 3.31 (m, 22H), 3.23 (t, *J* = 9.9 Hz, 1H), 2.66 – 2.56 (m, 2H), 1.89 (s, 6H), 1.88 (s, 3H), 1.85 (s, 3H), 1.68 (t, *J* = 12.0 Hz, 2H), 1.08 – 0.99 (m, 6H), 0.91 (d, *J* = 5.7 Hz, 3H).

M201

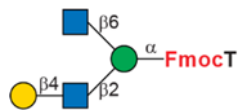

HPLC-UV<sub>260nm</sub>, T<sub>R</sub> = 16.26 min

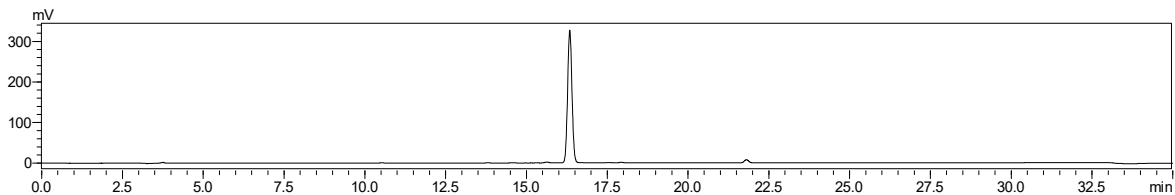

ESI-MS, calculated: 1071.3907; found [M-H]<sup>-</sup> 1070.3732

MALDI-MS, found [M+Na]<sup>+</sup> 1094.372, [M+K]<sup>+</sup> 1110.358

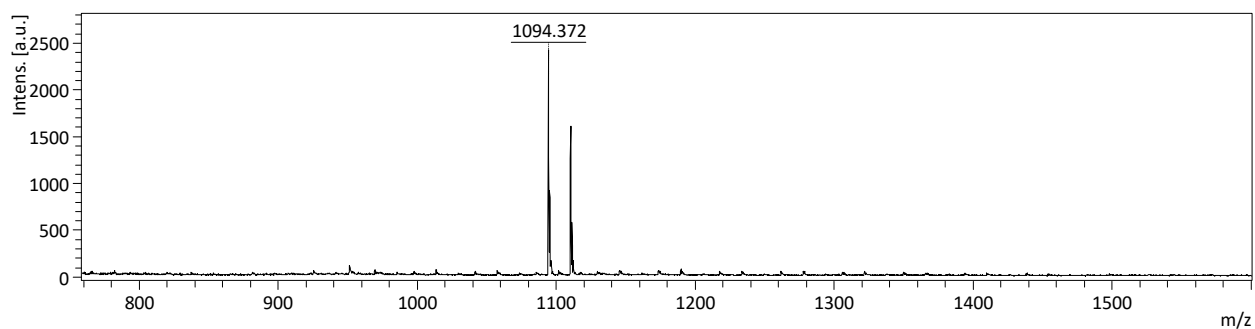

<sup>1</sup>H NMR (400 MHz, D<sub>2</sub>O) δ 7.68 – 7.56 (m, 2H), 7.56 – 7.36 (m, 2H), 7.36 – 7.16 (m, 5H), 4.59 – 4.51 (m, 1H), 4.47 (d, *J* = 8.4 Hz, 1H), 4.43 – 4.23 (m, 4H), 4.18 (d, *J* = 6.4 Hz, 1H), 4.09 (d, *J* = 10.3 Hz, 1H), 3.98 (d, *J* = 4.8 Hz, 1H), 3.90 – 3.80 (m, 4H), 3.80 – 3.55 (m, 16H), 3.55 – 3.42 (m, 5H), 3.41 – 3.24 (m, 5H), 1.97 (s, 3H), 1.95 (s, 4H), 0.95 (d, *J* = 6.1 Hz, 3H); <sup>13</sup>C NMR (100 MHz, D<sub>2</sub>O) δ 174.59, 174.15, 158.00, 143.88, 143.45, 140.96, 140.90, 127.97, 127.43, 124.80, 120.11, 102.90, 101.16, 99.84, 98.22, 78.31, 77.18, 76.85, 75.90, 75.31, 74.56, 73.93, 72.48, 71.95, 70.94, 70.06, 69.21, 68.56, 67.59, 65.98, 61.02, 60.87, 59.88, 55.57, 54.82, 48.89, 47.09, 22.50, 22.33, 18.49

M202

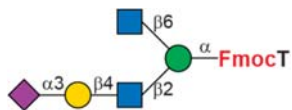

HPLC-UV<sub>260nm</sub>, T<sub>R</sub> = 14.86 min

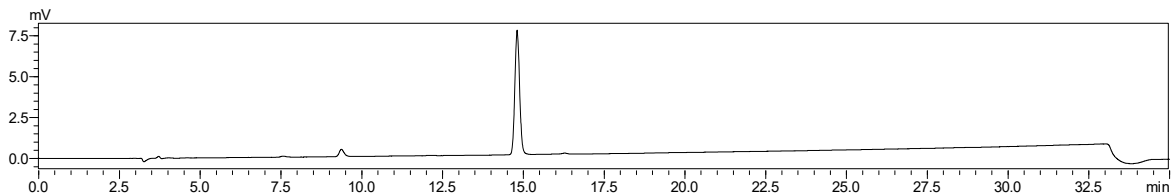

ESI-MS, calculated: 1362.4861; found [M-H]<sup>-</sup> 1361.4659, [M-2H]<sup>2-</sup> 680.2284

MALDI-MS; found [M+Na]<sup>+</sup> 1385.436, [M+K]<sup>+</sup> 1401.414

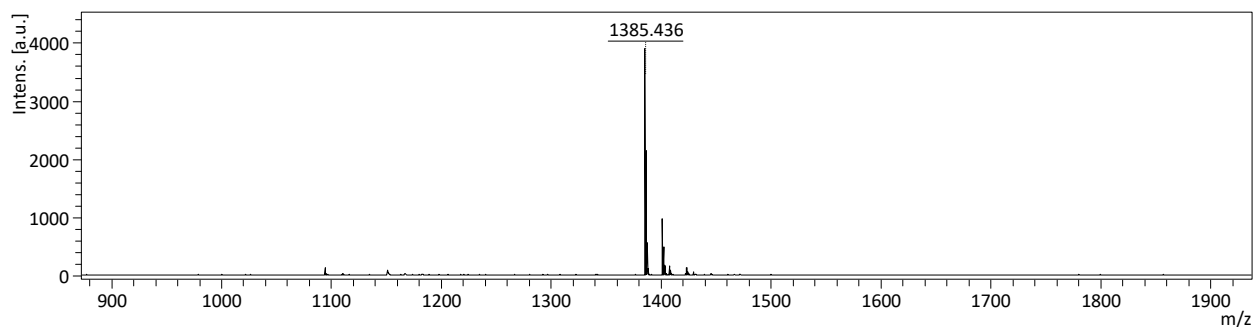

<sup>1</sup>H NMR (600 MHz, D<sub>2</sub>O) δ 7.63 – 7.47 (m, 2H), 7.47 – 7.26 (m, 2H), 7.26 – 7.07 (m, 4H), 4.63 (s, 1H), 4.50 – 4.34 (m, 3H), 4.31 – 4.19 (m, 2H), 4.15 (s, 1H), 4.08 – 3.97 (m, 3H), 3.93 (d, *J* = 11.3 Hz, 1H), 3.90 – 3.50 (m, 21H), 3.50 – 3.35 (m, 5H), 3.35 – 3.20 (m, 3H), 2.63 (d, *J* = 8.5 Hz, 1H), 1.90 (s, 6H), 1.87 (s, 3H), 1.75 (t, *J* = 12.2 Hz, 1H), 0.93 (d, *J* = 5.5 Hz, 3H).

M203

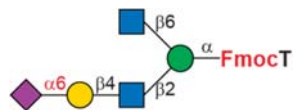

HPLC-UV<sub>260nm</sub>, T<sub>R</sub> = 15.12 min

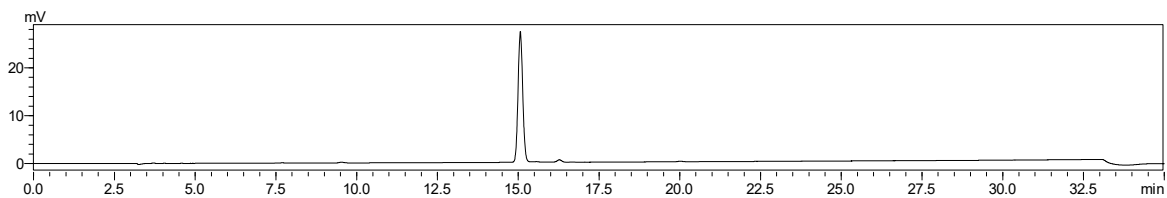

ESI-MS, calculated: 1362.4861; found [M-H]<sup>-</sup> 1361.4653, [M-2H]<sup>2-</sup> 680.2283

MALDI-MS; found [M-H]<sup>-</sup> 1361.438

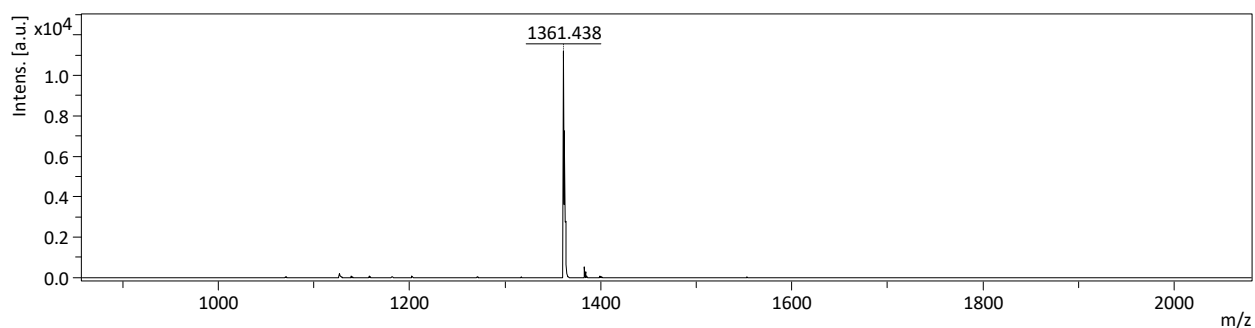

<sup>1</sup>H NMR (600 MHz, D<sub>2</sub>O) δ 7.92 – 7.78 (m, 2H), 7.72 – 7.54 (m, 2H), 7.49 – 7.30 (m, 4H), 4.63 – 4.55 (m, 2H), 4.47 (d, *J* = 8.6 Hz, 1H), 4.37 (m, 2H), 4.29 (m, 1H), 4.20 (m, 1H), 4.14 (d, *J* = 10.0 Hz, 1H), 4.07 (s, 1H), 3.94 (m, 2H), 3.91 – 3.43 (m, 33H), 3.43 – 3.27 (m, 4H), 2.59 (dd, *J* = 12.5, 4.5 Hz, 1H), 1.98 (s, 3H), 1.96 (s, 3H), 1.94 (s, 3H), 1.68 (t, *J* = 12.2 Hz, 1H), 0.97 (d, *J* = 6.4 Hz, 3H).

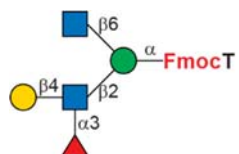

**M204**

HPLC-UV<sub>260nm</sub>, T<sub>R</sub> = 16.01 min

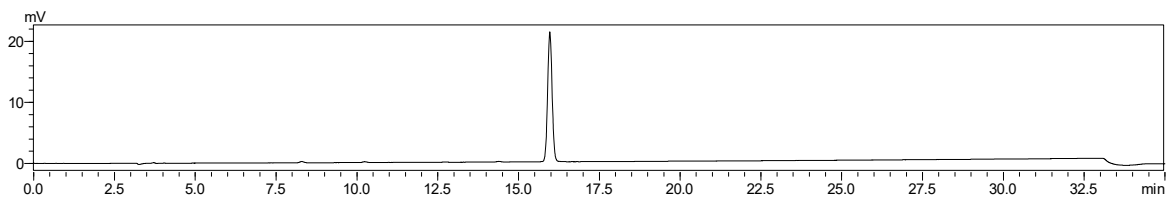

ESI-MS, calculated: 1217.4486; found [M-H]<sup>-</sup> 1216.4292

MALDI-MS; found [M+Na]<sup>+</sup> 1240.478, [M+K]<sup>+</sup> 1256.458

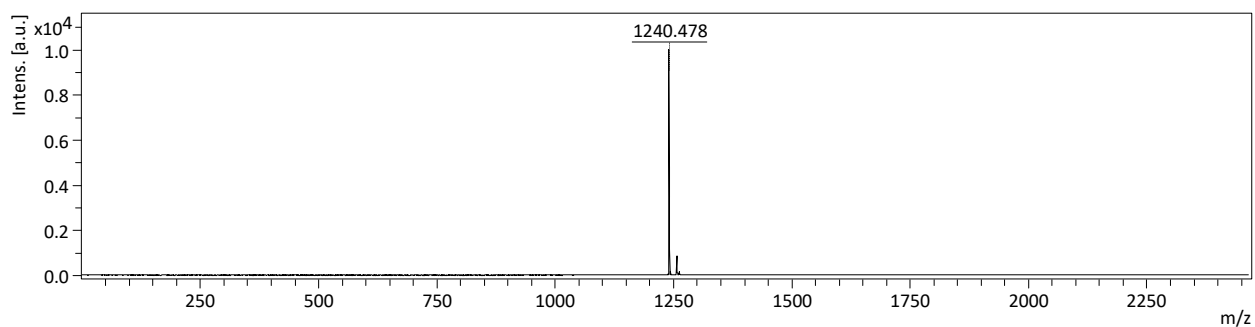

<sup>1</sup>H NMR (600 MHz, D<sub>2</sub>O) δ 7.90 – 7.68 (m, 2H), 7.67 – 7.50 (m, 2H), 7.46 – 7.26 (m, 4H), 5.03 (d, *J* = 3.5 Hz, 1H), 4.66 (s, 1H), 4.59 (d, *J* = 11.8 Hz, 1H), 4.54 – 4.42 (m, 2H), 4.36 (d, *J* = 7.8 Hz, 2H), 4.27 – 4.16 (m, 2H), 4.11 (d, *J* = 10.2 Hz, 2H), 3.99 (s, 1H), 3.94 – 3.55 (m, 18H), 3.55 – 3.26 (m, 8H), 1.96 (s, 3H), 1.94 (s, 3H), 1.10 (d, *J* = 6.4 Hz, 3H), 0.96 (d, *J* = 6.1 Hz, 3H).



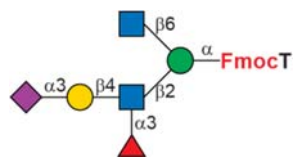

**M205**

HPLC-UV<sub>260nm</sub>, T<sub>R</sub> = 14.24 min

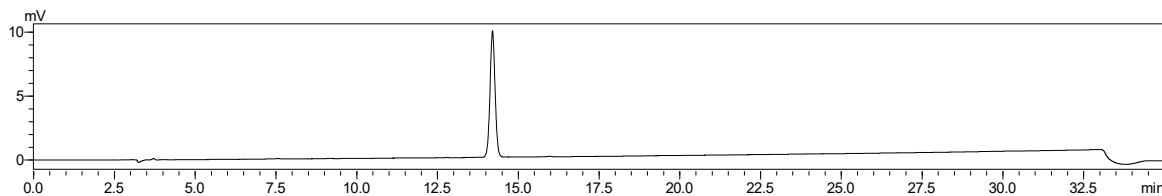

ESI-MS, calculated: 1508.5440; found [M-H]<sup>-</sup> 1507.5277

205\_180126131135 #69-152 RT: 1.48-3.27 AV: 84 NL: 1.27E5  
T: FTMS - p ESI Full ms [100.00-2000.00]

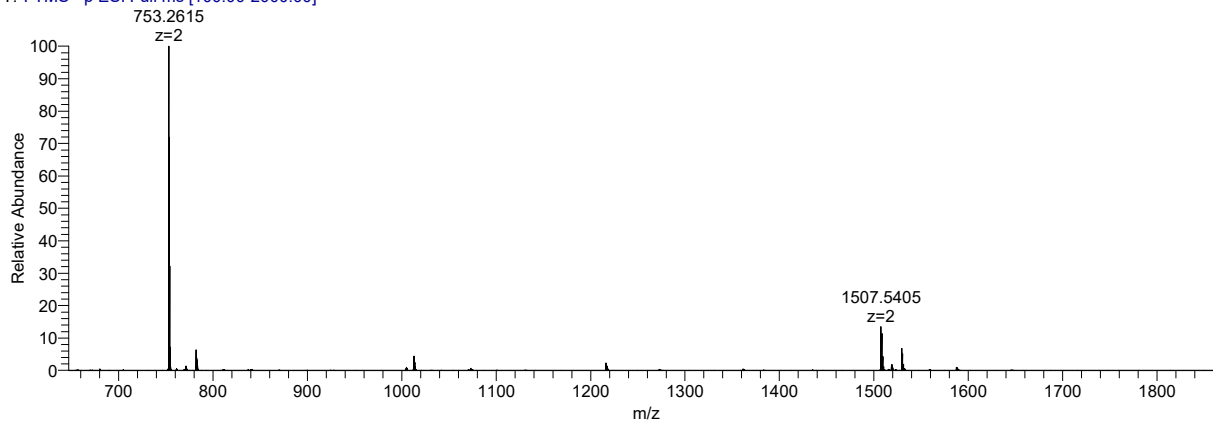

<sup>1</sup>H NMR (600 MHz, D<sub>2</sub>O) δ 7.84 – 7.72 (m, 2H), 7.66 – 7.48 (m, 2H), 7.43 – 7.26 (m, 4H), 4.98 (d, *J* = 3.8 Hz, 1H), 4.61 (s, 1H), 4.56 – 4.50 (m, 1H), 4.45 – 4.35 (m, 2H), 4.31 (d, *J* = 8.0 Hz, 1H), 4.24 – 4.17 (m, 1H), 4.14 (dd, *J* = 6.4, 2.1 Hz, 1H), 4.07 (d, *J* = 10.1 Hz, 1H), 4.02 (s, 1H), 3.98 (dd, *J* = 9.8, 2.8 Hz, 1H), 3.88 – 3.68 (m, 11H), 3.68 – 3.64 (m, 2H), 3.64 – 3.50 (m, 10H), 3.50 – 3.37 (m, 7H), 3.37 – 3.22 (m, 4H), 2.65 (dd, *J* = 12.4, 4.4 Hz, 1H), 1.91 (s, 3H), 1.90 (s, 3H), 1.88 (s, 3H), 1.71 (t, *J* = 12.2 Hz, 1H), 1.05 (d, *J* = 6.5 Hz, 3H), 0.92 (d, *J* = 6.4 Hz, 3H).

M212

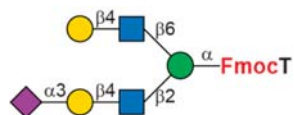

HPLC-UV<sub>260nm</sub>, T<sub>R</sub> = 13.15 min

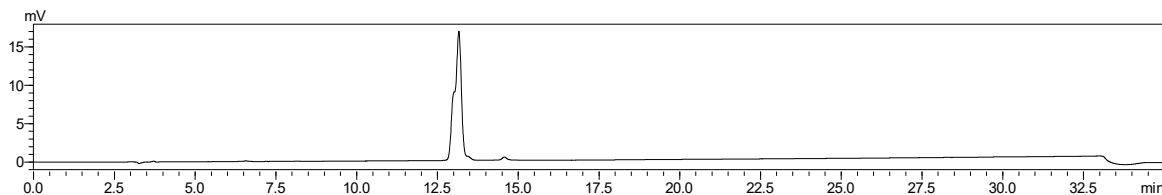

ESI-MS, calculated: 1524.5390; found [M-H]<sup>-</sup> 1523.5161, [M-2H]<sup>2-</sup> 761.2533

MALDI-MS; found [M+Na]<sup>+</sup> 1547.593

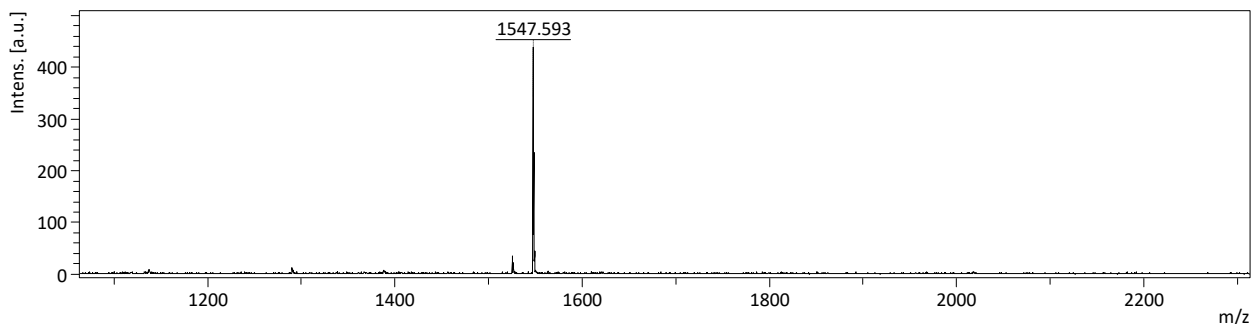

<sup>1</sup>H NMR (600 MHz, D<sub>2</sub>O) δ 7.93 – 7.79 (m, 2H), 7.72 – 7.55 (m, 2H), 7.50 – 7.30 (m, 4H), 4.78 (d, *J* = 5.7 Hz, 1H), 4.64 (d, *J* = 3.2 Hz, 1H), 4.55 (d, *J* = 10.7 Hz, 2H), 4.52 – 4.43 (m, 2H), 4.43 – 4.33 (m, 2H), 4.33 – 4.24 (m, 2H), 4.20 (d, *J* = 4.9 Hz, 1H), 4.16 – 3.98 (m, 3H), 3.98 – 3.38 (m, 32H), 3.30 (t, *J* = 9.8 Hz, 1H), 2.68 (dd, *J* = 12.5, 4.4 Hz, 1H), 1.96 (s, 6H), 1.93 (s, 3H), 1.75 (t, *J* = 12.2 Hz, 1H), 1.00 (d, *J* = 6.0 Hz, 3H).

**M213**

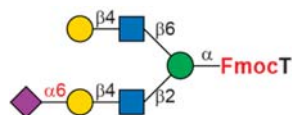

HPLC-UV<sub>260nm</sub>, T<sub>R</sub> = 13.52 min

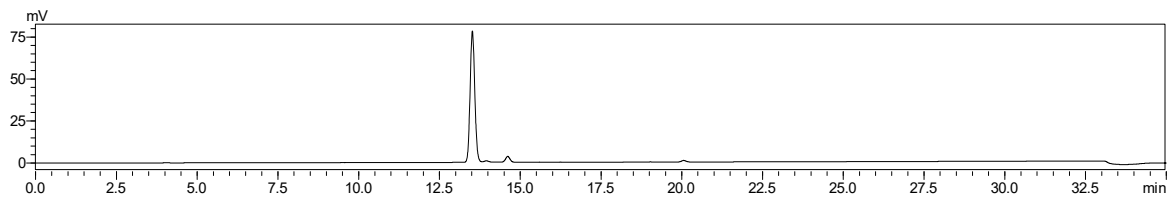

ESI-MS, calculated: 1524.5390; found [M-H]<sup>-</sup> 1523.5166, [M-2H]<sup>2-</sup> 761.2534

MALDI-MS; found [M-H]<sup>-</sup> 1523.553

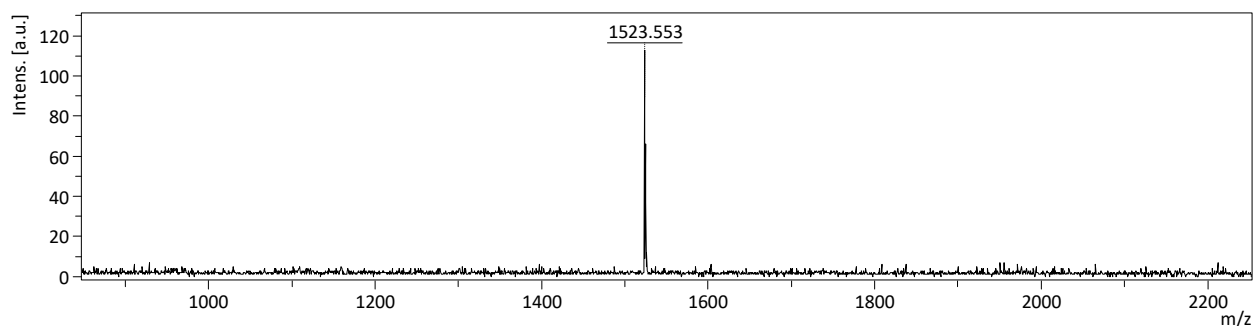

<sup>1</sup>H NMR (600 MHz, D<sub>2</sub>O) δ 7.88 – 7.75 (m, 2H), 7.68 – 7.51 (m, 2H), 7.49 – 7.29 (m, 4H), 4.78 – 4.72 (m, 1H), 4.70 – 4.65 (m, 1H), 4.61 – 4.51 (m, 1H), 4.47 (d, *J* = 10.6 Hz, 1H), 4.42 – 4.33 (m, 2H), 4.30 (d, *J* = 7.7 Hz, 1H), 4.28 – 4.18 (m, 2H), 4.12 (s, 2H), 3.99 – 3.38 (m, 35H), 3.31 (t, *J* = 9.9 Hz, 1H), 2.57 (dd, *J* = 12.7, 4.3 Hz, 1H), 1.98 (s, 3H), 1.96 (s, 3H), 1.93 (s, 3H), 1.73 (t, *J* = 12.2 Hz, 1H), 1.00 (d, *J* = 6.2 Hz, 3H).

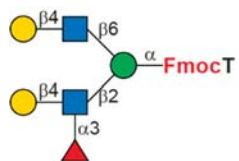

**M214**

HPLC-UV<sub>260nm</sub>, T<sub>R</sub> = 14.41 min

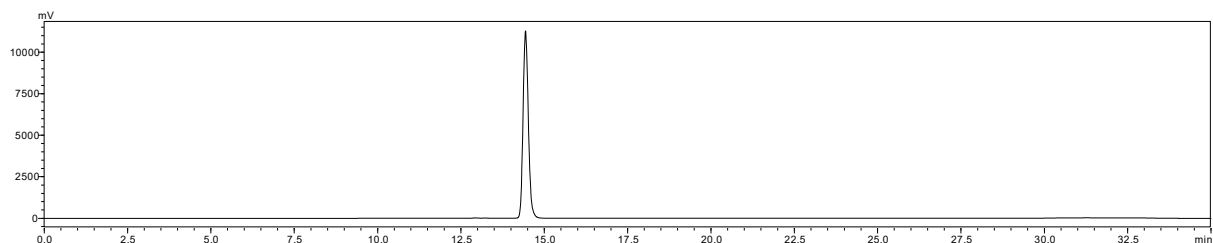

ESI-MS, calculated: 1379.5014; found [M-H]<sup>-</sup> 1378.4804

214-SHUAI #69-151 RT: 1.48-3.27 AV: 83 NL: 4.41E4  
T: FTMS - p ESI Full ms [100.00-2000.00]

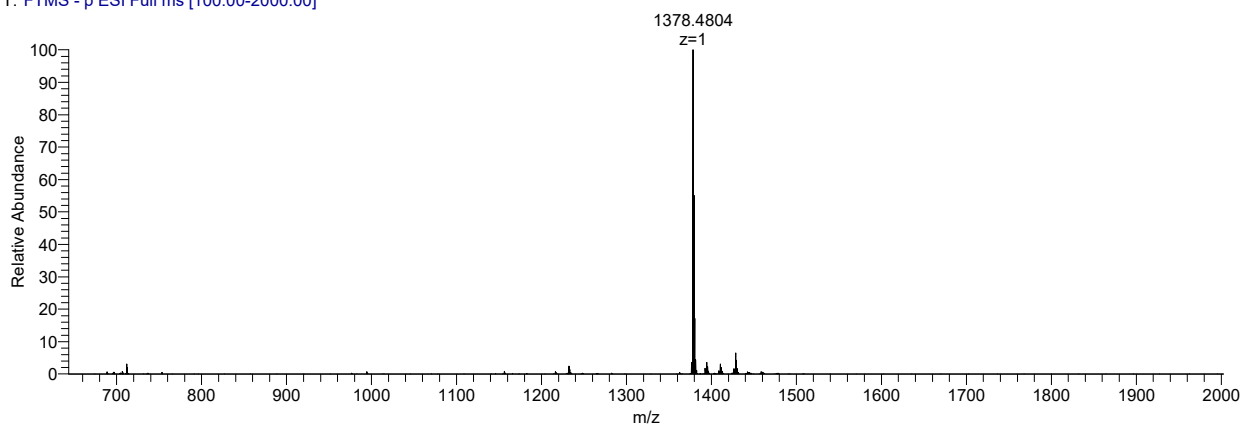

<sup>1</sup>H NMR (600 MHz, D<sub>2</sub>O) δ 7.94 – 7.78 (m, 2H), 7.72 – 7.54 (m, 2H), 7.54 – 7.30 (m, 4H), 5.03 (d, *J* = 3.8 Hz, 1H), 4.77 – 4.75 (m, 1H), 4.67 (s, 1H), 4.49 (d, *J* = 7.9 Hz, 1H), 4.36 (d, *J* = 7.8 Hz, 2H), 4.31 (d, *J* = 7.7 Hz, 1H), 4.27 (s, 1H), 4.21 (d, *J* = 5.5 Hz, 1H), 4.11 (d, *J* = 11.3 Hz, 1H), 4.03 (s, 1H), 3.97 – 3.38 (m, 33H), 3.30 (t, *J* = 10.0 Hz, 1H), 1.96 (s, 3H), 1.94 (s, 3H), 1.11 (d, *J* = 6.2 Hz, 3H), 0.99 (d, *J* = 6.3 Hz, 3H).

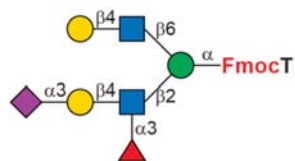

**M215**

HPLC-UV<sub>260nm</sub>, T<sub>R</sub> = 12.69 min

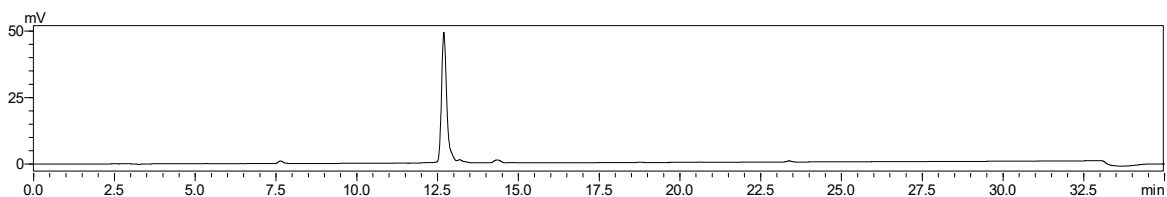

ESI-MS, calculated: 1670.5969; found [M-H]<sup>-</sup> 1669.5942, [M-2H]<sup>2-</sup> 834.2878

215\_180126132427 #69-151 RT: 1.48-3.27 AV: 83 NL: 1.62E5  
T: FTMS - p ESI Full ms [100.00-2000.00]

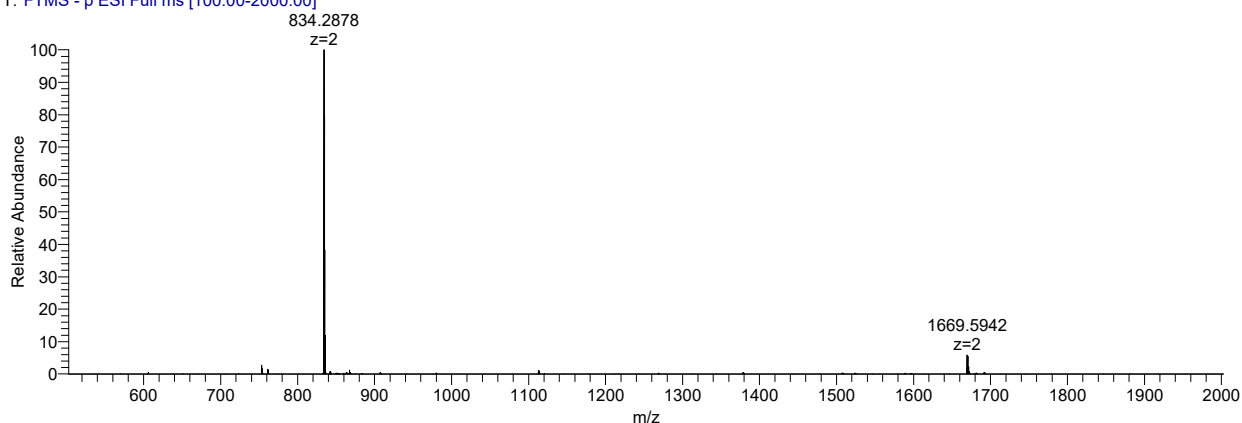

<sup>1</sup>H NMR (600 MHz, D<sub>2</sub>O) δ 7.91 – 7.80 (m, 2H), 7.71 – 7.55 (m, 2H), 7.49 – 7.31 (m, 4H), 5.03 (d, *J* = 3.9 Hz, 1H), 4.77 – 4.75 (m, 1H), 4.68 – 4.65 (m, 1H), 4.56 (dd, *J* = 10.9, 5.0 Hz, 1H), 4.51 – 4.41 (m, 2H), 4.38 (d, *J* = 8.1 Hz, 1H), 4.34 – 4.25 (m, 2H), 4.21 (dd, *J* = 6.3, 2.2 Hz, 1H), 4.15 – 4.06 (m, 2H), 4.03 (dd, *J* = 9.8, 3.0 Hz, 1H), 3.96 – 3.76 (m, 12H), 3.76 – 3.42 (m, 26H), 3.30 (t, *J* = 9.8 Hz, 1H), 2.70 (dd, *J* = 12.4, 4.6 Hz, 1H), 1.96 (s, 3H), 1.95 (s, 3H), 1.93 (s, 3H), 1.75 (t, *J* = 12.1 Hz, 1H), 1.10 (d, *J* = 6.6 Hz, 3H), 1.00 (d, *J* = 6.3 Hz, 3H).

M223

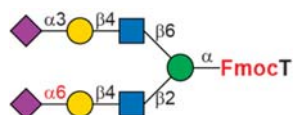

HPLC-FL,  $T_R = 12.07$  min

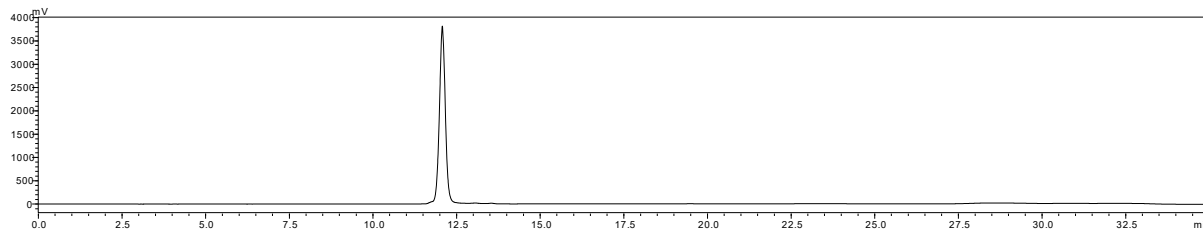

ESI-MS, calculated: 1815.6344; found  $[M-H]^-$  1814.6084,  $[M-2H]^{2-}$  906.7991

223\_171027032658 #69-151 RT: 1.48-3.28 AV: 83 NL: 3.80E3  
T: FTMS - p ESI Full ms [100.00-2000.00]

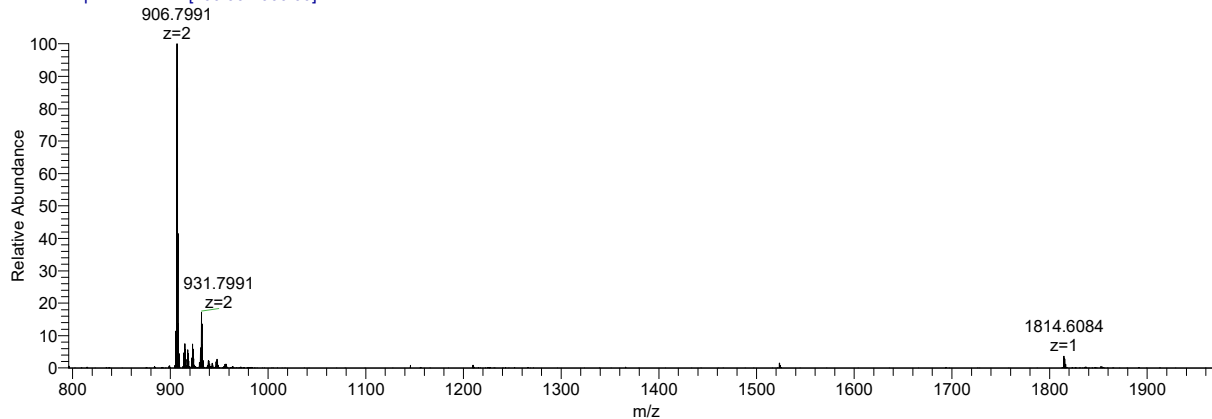

$^1H$  NMR (600 MHz,  $D_2O$ )  $\delta$  7.91 – 7.77 (m, 2H), 7.63 (ddd,  $J = 28.7, 16.5, 7.2$  Hz, 2H), 7.54 – 7.27 (m, 4H), 4.57 (dd,  $J = 11.0, 5.1$  Hz, 1H), 4.48 (d,  $J = 8.4$  Hz, 1H), 4.42 (d,  $J = 7.9$  Hz, 1H), 4.40 – 4.34 (m, 2H), 4.34 – 4.25 (m, 1H), 4.25 – 4.18 (m, 1H), 4.17 – 4.00 (m, 3H), 4.00 – 3.41 (m, 40H), 3.31 (t,  $J = 9.8$  Hz, 1H), 2.69 (dd,  $J = 12.5, 4.5$  Hz, 1H), 2.59 (dd,  $J = 12.5, 4.5$  Hz, 1H), 1.98 (s, 3H), 1.96 (s, 6H), 1.93 (s, 3H), 1.76 (t,  $J = 12.2$  Hz, 1H), 1.69 (t,  $J = 12.2$  Hz, 1H), 1.00 (d,  $J = 6.3$  Hz, 3H).

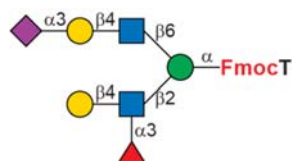

**M224**

HPLC-UV<sub>260nm</sub>, T<sub>R</sub> = 12.09 min

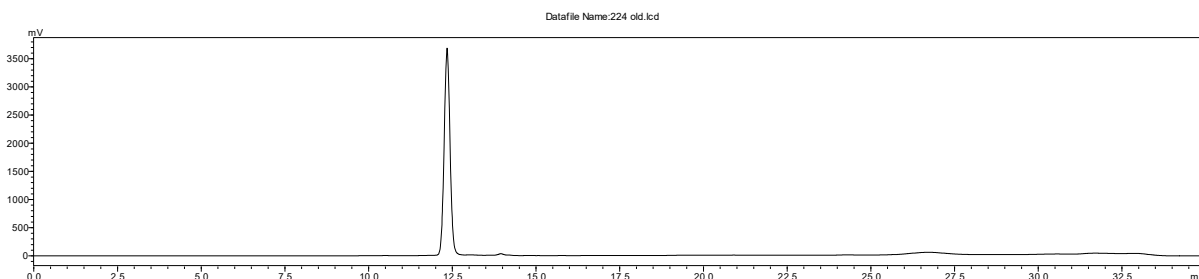

ESI-MS, calculated: 1670.5969; found [M-H]<sup>-</sup> 1669.5733, [M-2H]<sup>2-</sup> 834.2812

224-1 #69-151 RT: 1.48-3.28 AV: 83 NL: 1.71E3  
T: FTMS - p ESI Full ms [100.00-2000.00]

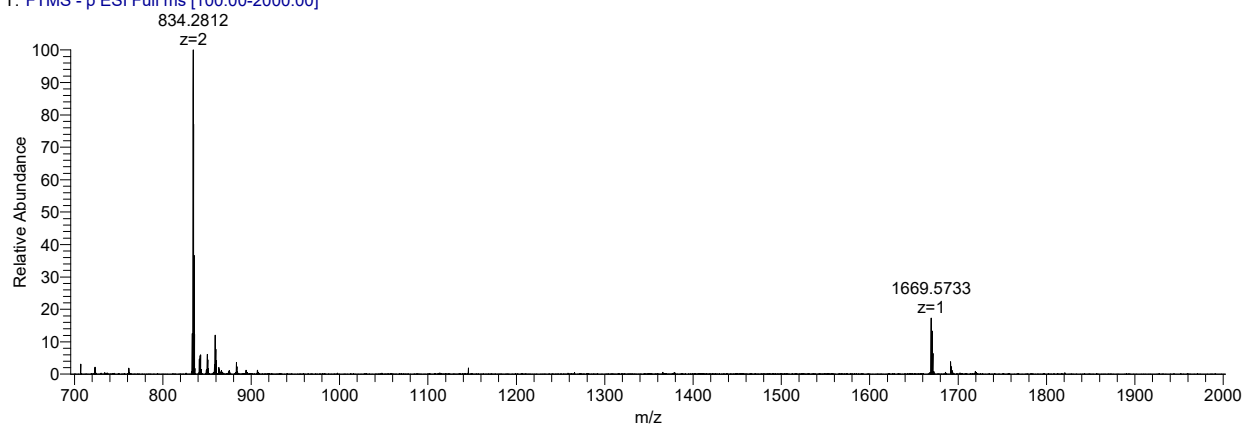

<sup>1</sup>H NMR (600 MHz, D<sub>2</sub>O) δ 7.94 – 7.81 (m, 2H), 7.78 – 7.56 (m, 2H), 7.50 – 7.30 (m, 4H), 5.07 – 4.99 (m, 2H), 4.54 – 4.46 (m, 2H), 4.46 – 4.33 (m, 2H), 4.29 (s, 1H), 4.26 – 4.14 (m, 1H), 4.08 (d, *J* = 10.8 Hz, 1H), 4.05 – 3.98 (m, 1H), 3.92 (t, *J* = 12.1 Hz, 1H), 3.89 – 3.55 (m, 28H), 3.55 – 3.38 (m, 9H), 3.28 (t, *J* = 9.8 Hz, 1H), 2.69 (dd, *J* = 12.3, 4.4 Hz, 1H), 2.00 – 1.86 (m, 9H), 1.73 (t, *J* = 12.1 Hz, 1H), 1.15 – 1.02 (m, 6H), 0.94 (d, *J* = 6.3 Hz, 3H).

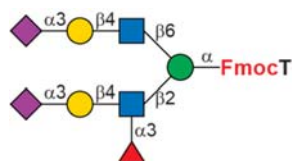

**M225**

HPLC-FL,  $T_R = 11.34$  min

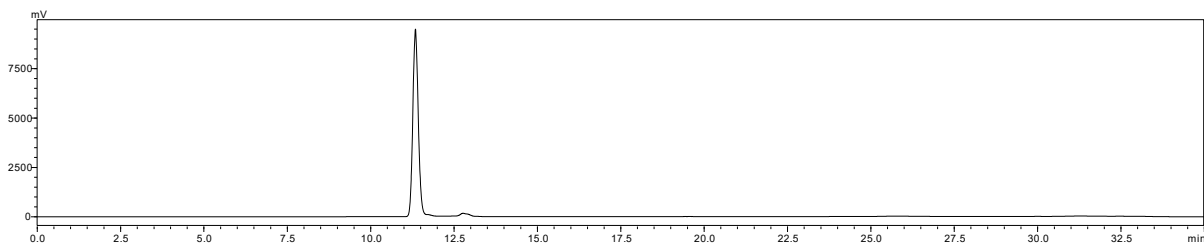

ESI-MS, calculated: 1961.6923; found  $[M-2H]^{2-}$  979.8275

225\_171027040542 #69-151 RT: 1.48-3.27 AV: 83 NL: 2.42E3  
T: FTMS - p ESI Full ms [100.00-2000.00]

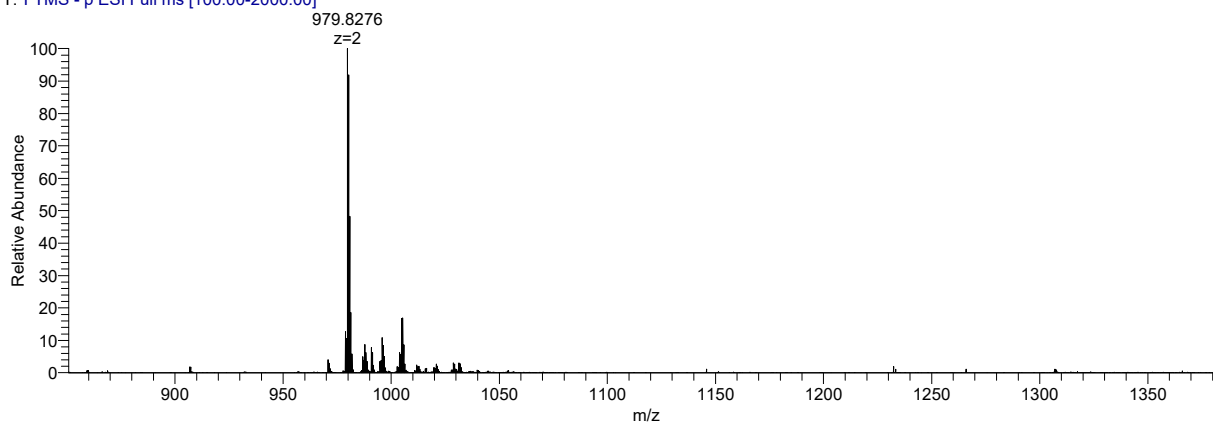

$^1\text{H}$  NMR (600 MHz,  $\text{D}_2\text{O}$ )  $\delta$  7.93 – 7.80 (m, 2H), 7.72 – 7.55 (m, 2H), 7.53 – 7.33 (m, 4H), 5.03 (d,  $J = 4.0$  Hz, 1H), 4.61 – 4.53 (m, 2H), 4.52 – 4.35 (m, 5H), 4.30 (s, 2H), 4.24 – 4.15 (m, 1H), 4.05 (m, 4H), 3.98 – 3.38 (m, 39H), 3.37 – 3.25 (m, 2H), 3.23 – 3.15 (m, 1H), 2.74 – 2.65 (m, 2H), 1.96 (s, 6H), 1.95 (s, 3H), 1.93 (s, 3H), 1.92 (s, 3H), 1.74 (t,  $J = 11.9$  Hz, 2H), 1.10 (d,  $J = 6.5$  Hz, 3H), 0.99 (d,  $J = 6.4$  Hz, 3H).



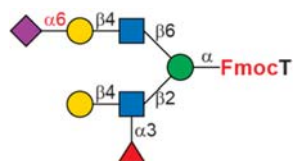

**M234**

HPLC-UV<sub>260nm</sub>, T<sub>R</sub> = 12.96 min

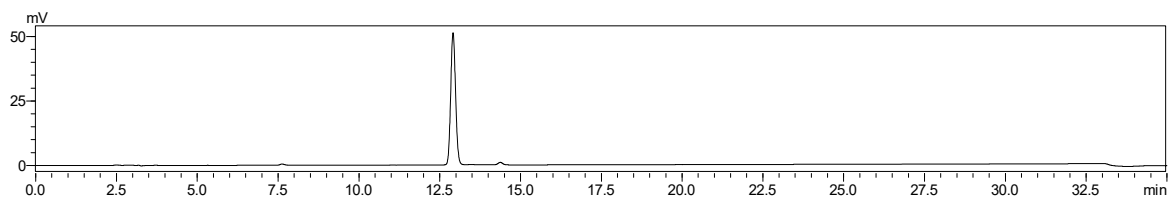

ESI-MS, calculated: 1670.5969; found [M-H]<sup>-</sup> 1669.5733, [M-2H]<sup>2-</sup> 834.2816

MALDI-MS; found [M-H]<sup>-</sup> 1669.520

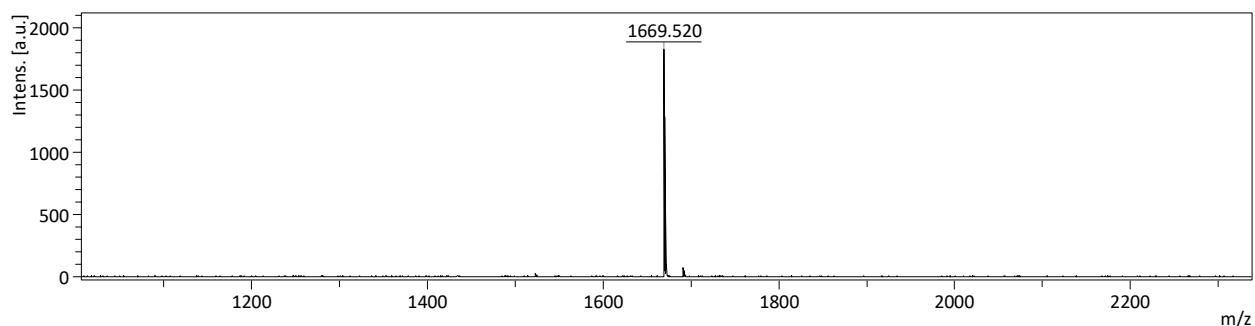

<sup>1</sup>H NMR (600 MHz, D<sub>2</sub>O) δ 7.92 – 7.78 (m, 2H), 7.72 – 7.55 (m, 2H), 7.53 – 7.32 (m, 4H), 5.03 (d, *J* = 3.8 Hz, 1H), 4.56 (d, *J* = 12.5 Hz, 1H), 4.51 (d, *J* = 8.3 Hz, 1H), 4.45 – 4.33 (m, 3H), 4.29 (s, 2H), 4.21 (d, *J* = 6.3 Hz, 1H), 4.15 – 4.02 (m, 2H), 4.02 – 3.35 (m, 38H), 3.35 – 3.26 (m, 1H), 2.60 (dd, *J* = 12.2, 4.6 Hz, 1H), 1.97 (s, 3H), 1.96 (s, 3H), 1.95 (s, 3H), 1.70 – 1.63 (m, 1H), 1.10 (d, *J* = 6.3 Hz, 3H), 0.99 (d, *J* = 5.4 Hz, 3H).

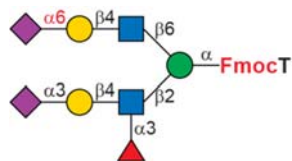

**M235**

HPLC-FL,  $T_R = 11.42$  min

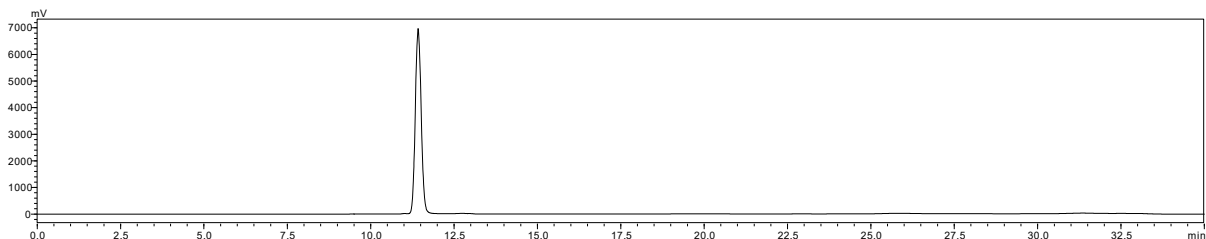

ESI-MS, calculated: 1961.6923; found  $[M-2H]^{2-}$  979.8283

shuai\_M235 #69-151 RT: 1.48-3.27 AV: 83 NL: 2.46E3  
T: FTMS - p ESI Full ms [100.00-2000.00]

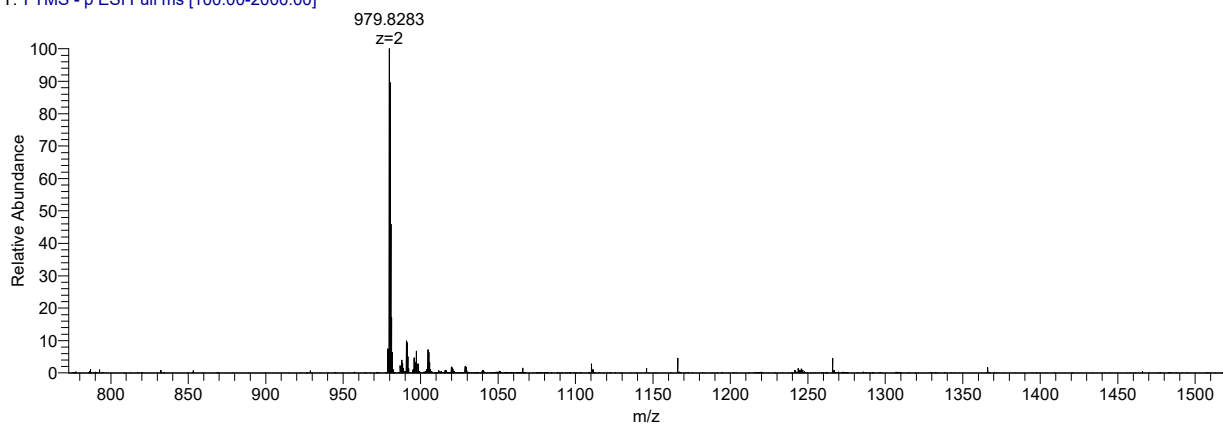

$^1\text{H}$  NMR (600 MHz,  $\text{D}_2\text{O}$ )  $\delta$  7.92 – 7.79 (m, 2H), 7.78 – 7.54 (m, 2H), 7.51 – 7.32 (m, 4H), 5.03 (d,  $J = 4.0$  Hz, 1H), 4.62 – 4.56 (m, 2H), 4.50 (d,  $J = 8.1$  Hz, 1H), 4.49 – 4.44 (m, 1H), 4.43 (d,  $J = 8.0$  Hz, 1H), 4.41 – 4.34 (m, 1H), 4.32 – 4.27 (m, 2H), 4.21 (d,  $J = 5.2$  Hz, 1H), 4.15 – 4.05 (m, 2H), 4.02 (dd,  $J = 10.1, 2.7$  Hz, 1H), 3.99 – 3.39 (m, 46H), 3.35 – 3.27 (m, 1H), 2.69 (dd,  $J = 12.4, 4.5$  Hz, 1H), 2.60 (dd,  $J = 12.1, 4.3$  Hz, 1H), 1.96 (s, 3H), 1.96 (s, 3H), 1.92 (s, 3H), 1.75 (t,  $J = 12.3$  Hz, 1H), 1.71 – 1.64 (m, 1H), 1.10 (d,  $J = 6.5$  Hz, 3H), 1.00 (d,  $J = 6.0$  Hz, 3H).

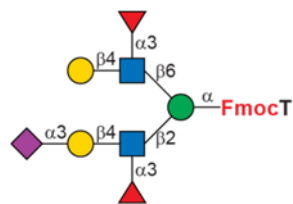

**M245**

HPLC-UV<sub>260nm</sub>, T<sub>R</sub> = 12.13 min

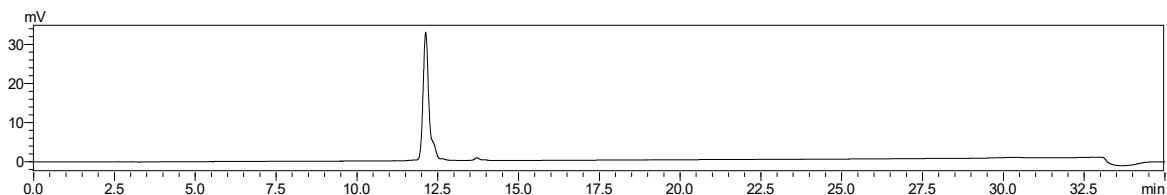

ESI-MS, calculated: 1816.6548; found [M-H]<sup>-</sup> 1815.6307, [M-2H]<sup>2-</sup> 907.3100

245\_171027052313 #69-151 RT: 1.48-3.27 AV: 83 NL: 2.68E3  
T: FTMS - p ESI Full ms [100.00-2000.00]

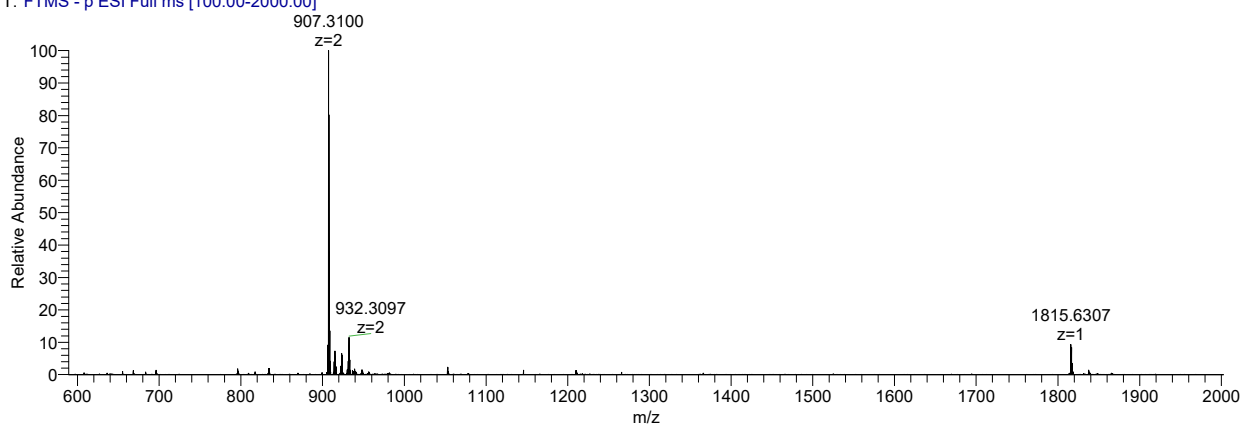

<sup>1</sup>H NMR (600 MHz, D<sub>2</sub>O) δ 7.87 – 7.75 (m, 2H), 7.68 – 7.48 (m, 2H), 7.46 – 7.26 (m, 4H), 4.96 (d, *J* = 3.2 Hz, 2H), 4.60 – 4.58 (m, 2H), 4.48 – 4.39 (m, 3H), 4.36 (d, *J* = 7.6 Hz, 2H), 4.31 (d, *J* = 9.5 Hz, 2H), 4.22 (d, *J* = 5.9 Hz, 2H), 4.16 – 4.15 (m, 1H), 4.13 (d, *J* = 5.7 Hz, 1H), 4.02 (d, *J* = 10.4 Hz, 1H), 3.95 (d, *J* = 9.9 Hz, 2H), 3.88 – 3.61 (m, 18H), 3.61 – 3.49 (m, 9H), 3.49 – 3.29 (m, 9H), 3.27 – 3.17 (m, 2H), 2.62 (dd, *J* = 12.2, 3.7 Hz, 1H), 1.89 (s, 6H), 1.87 (s, 3H), 1.66 (t, *J* = 12.3 Hz, 1H), 1.03 (d, *J* = 6.0 Hz, 6H), 0.91 (d, *J* = 6.2 Hz, 3H).

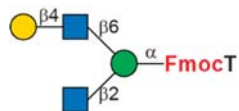

**M301**

HPLC-UV<sub>260nm</sub>, T<sub>R</sub> = 16.19 min

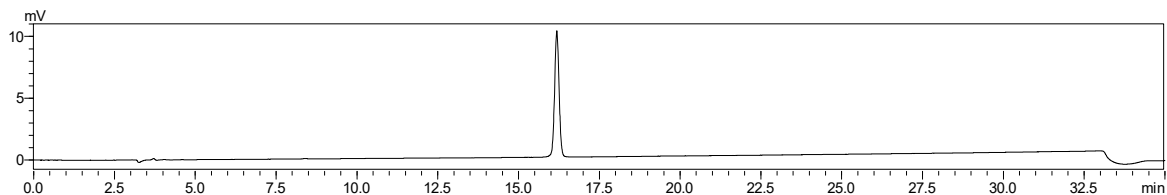

ESI-MS, calculated: 1071.3907; found [M-H]<sup>-</sup> 1070.3777

MALDI-MS; found [M+Na]<sup>+</sup> 1094.388

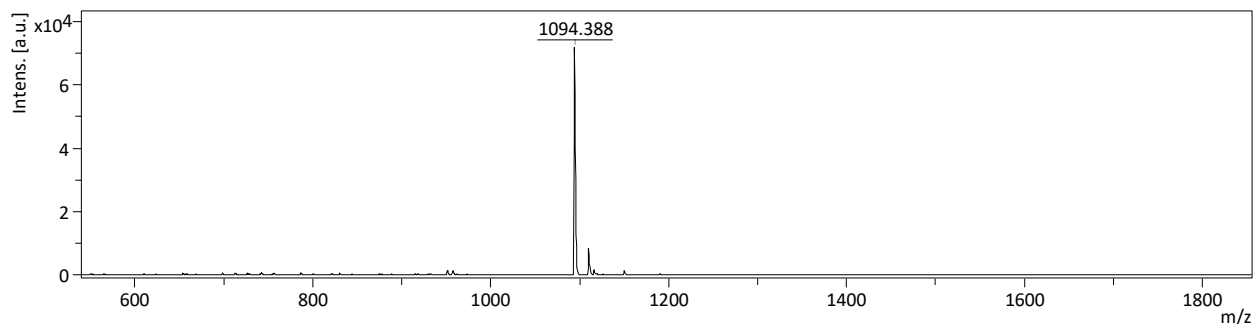

<sup>1</sup>H NMR (400 MHz, MeOD) δ 7.79 (d, *J* = 7.5 Hz, 2H), 7.74 – 7.58 (m, 2H), 7.44 – 7.27 (m, 4H), 4.55 (d, *J* = 7.7 Hz, 1H), 4.50 – 4.31 (m, 5H), 4.23 (t, *J* = 6.7 Hz, 1H), 4.18 – 4.02 (m, 2H), 4.01 – 3.84 (m, 5H), 3.84 – 3.51 (m, 14H), 3.51 – 3.30 (m, 6H), 2.08 (s, 3H), 2.06 (s, 3H), 1.22 (d, *J* = 5.9 Hz, 2H); <sup>13</sup>C NMR (100 MHz, MeOD) δ 173.40, 172.73, 157.41, 144.06, 143.80, 141.18, 127.42, 126.85, 124.88, 119.55, 103.81, 101.78, 98.66, 79.69, 79.33, 76.38, 75.74, 75.04, 73.89, 73.41, 72.46, 71.20, 70.54, 69.85, 68.93, 68.64, 67.77, 66.59, 61.16, 60.88, 60.39, 55.28, 47.08, 22.35, 22.12, 18.44.

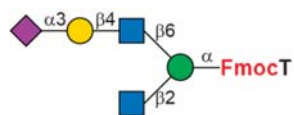

**M302**

HPLC-UV<sub>260nm</sub>, T<sub>R</sub> = 14.58 min

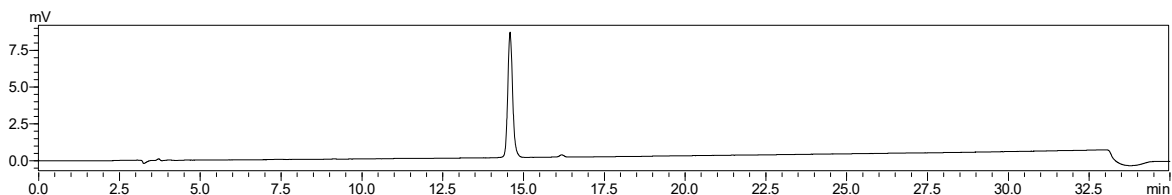

ESI-MS, calculated: 1362.4861; found [M-H]<sup>-</sup> 1361.4634, [M-2H]<sup>2-</sup> 680.2272

MALDI-MS; found [M+H]<sup>+</sup> 1363.4380, [M+Na]<sup>+</sup> 1385.418

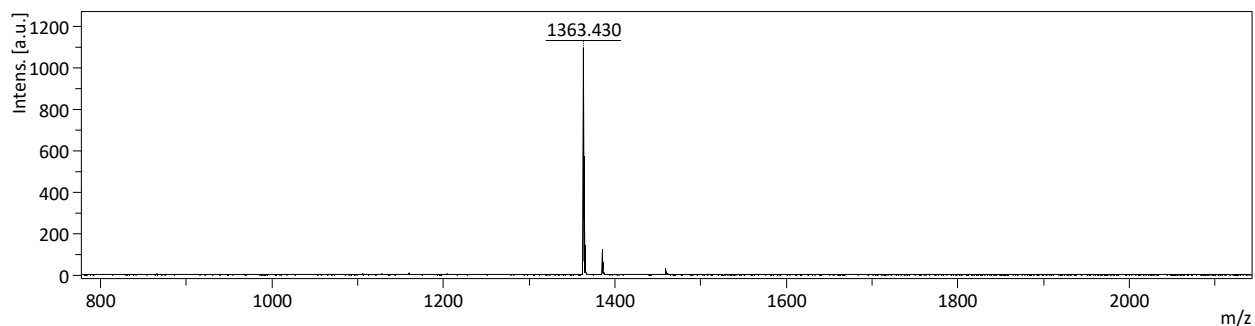

<sup>1</sup>H NMR (600 MHz, D<sub>2</sub>O) δ 7.79 – 7.66 (m, 2H), 7.61 – 7.42 (m, 2H), 7.38 – 7.22 (m, 4H), 4.68 – 4.58 (m, 1H), 4.58 – 4.47 (m, 1H), 4.47 – 4.36 (m, 1H), 4.33 (d, *J* = 7.8 Hz, 1H), 4.29 (t, *J* = 7.7 Hz, 1H), 4.22 (d, *J* = 7.6 Hz, 1H), 4.20 – 3.96 (m, 3H), 3.93 – 3.80 (m, 1H), 3.80 – 3.34 (m, 30H), 3.34 – 3.20 (m, 3H), 2.63 (dd, *J* = 12.4, 4.1 Hz, 1H), 1.91 (s, 6H), 1.87 (s, 3H), 1.74 (t, *J* = 12.2 Hz, 1H), 0.94 (d, *J* = 6.2 Hz, 3H).

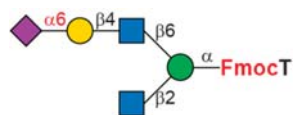

**M303**

HPLC-FL,  $T_R = 14.57$  min

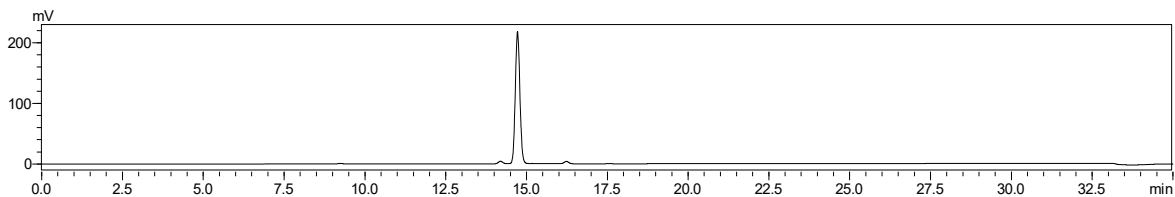

ESI-MS, calculated: 1362.4861; found  $[M-H]^-$  1361.4637,  $[M-2H]^{2-}$  680.2274

MALDI-MS; found  $[M-H]^-$  1361.427

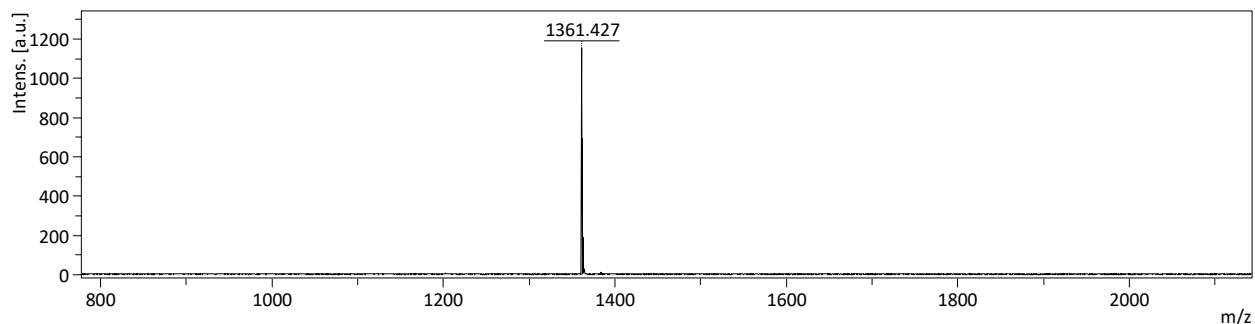

$^1H$  NMR (600 MHz,  $D_2O$ )  $\delta$  7.92 – 7.73 (m, 2H), 7.73 – 7.49 (m, 2H), 7.49 – 7.29 (m, 4H), 4.68 (s, 1H), 4.60 – 4.43 (m, 2H), 4.36 (d,  $J = 7.9$  Hz, 1H), 4.29 (d,  $J = 6.5$  Hz, 1H), 4.28 – 4.18 (m, 3H), 4.18 – 4.05 (m, 3H), 4.04 – 3.88 (m, 4H), 3.88 – 3.41 (m, 21H), 3.41 – 3.26 (m, 4H), 2.59 (dd,  $J = 12.4, 3.8$  Hz, 1H), 1.99 (s, 3H), 1.98 (s, 3H), 1.96 (s, 3H), 1.75 (t,  $J = 12.1$  Hz, 1H), 1.02 (d,  $J = 6.3$  Hz, 3H).

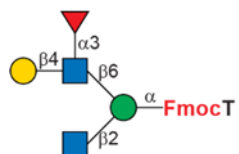

**M304**

HPLC-FL,  $T_R = 15.19$  min

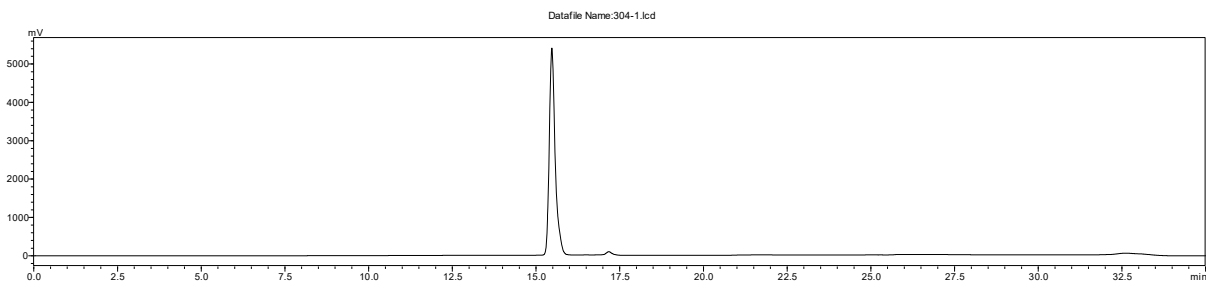

ESI-MS, calculated: 1217.4486; found  $[M+H]^+$  1218.4589,  $[M+Na]^+$  1240.4386

MALDI-MS, found  $[M-H]^-$  1216.436

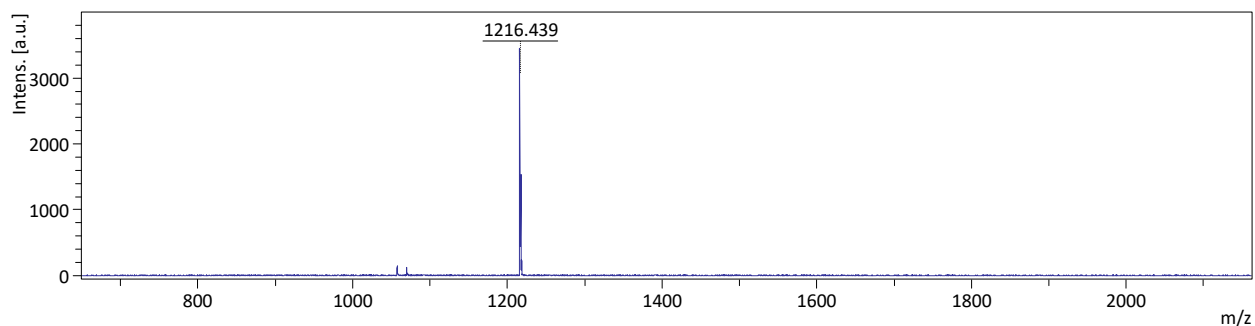

$^1H$  NMR (600 MHz,  $D_2O$ )  $\delta$  7.87 – 7.73 (m, 2H), 7.74 – 7.51 (m, 2H), 7.51 – 7.29 (m, 4H), 5.02 (d,  $J = 3.9$  Hz, 1H), 4.75 (d,  $J = 7.1$  Hz, 1H), 4.65 – 4.54 (m, 1H), 4.54 – 4.44 (m, 2H), 4.41 – 4.32 (m, 1H), 4.27 (d,  $J = 7.8$  Hz, 1H), 4.21 (d,  $J = 4.7$  Hz, 2H), 4.16 – 4.02 (m, 2H), 3.90 (d,  $J = 10.4$  Hz, 1H), 3.89 – 3.29 (m, 26H), 1.96 (s, 3H), 1.93 (s, 3H), 1.10 (d,  $J = 6.5$  Hz, 3H), 1.00 (d,  $J = 6.3$  Hz, 3H).

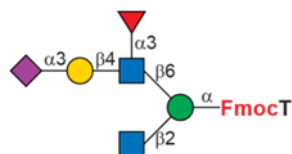

**M305**

HPLC-UV<sub>260nm</sub>, T<sub>R</sub> = 13.55 min

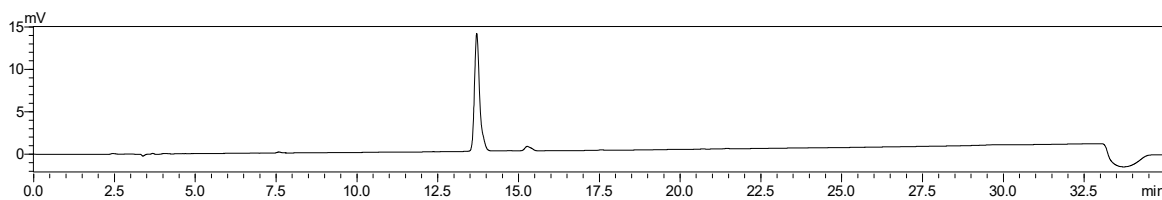

ESI-MS, calculated: 1508.544; found [M-H]<sup>-</sup> 1507.5194, [M-2H]<sup>2-</sup> 753.2551

305\_171027000030 #69-151 RT: 1.48-3.27 AV: 83 NL: 3.62E3  
T: FTMS - p ESI Full ms [100.00-2000.00]

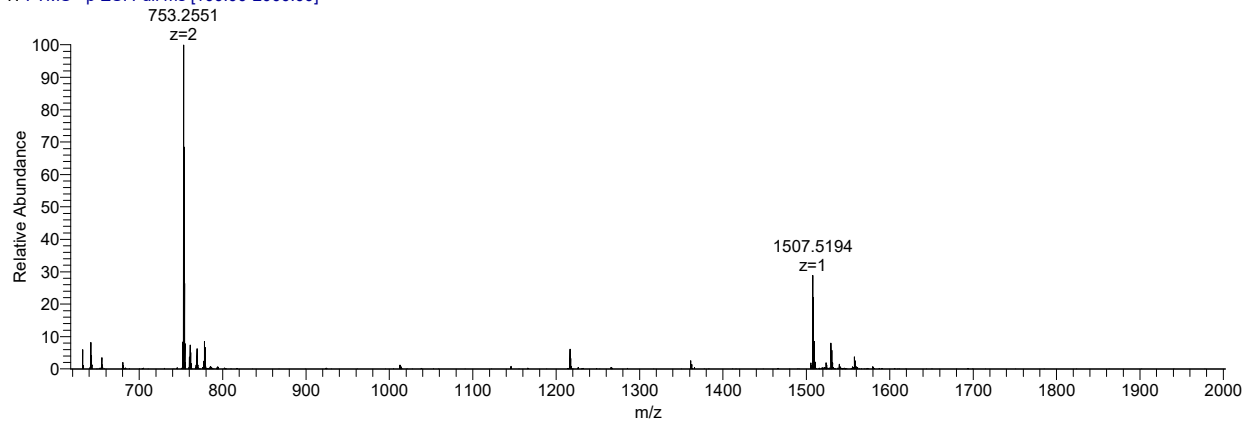

<sup>1</sup>H NMR (600 MHz, D<sub>2</sub>O) δ 7.77 – 7.59 (m, 2H), 7.59 – 7.37 (m, 2H), 7.37 – 7.15 (m, 4H), 4.98 (d, *J* = 3.4 Hz, 1H), 4.66 (s, 1H), 4.54 (s, 1H), 4.51 – 4.39 (m, 2H), 4.39 – 4.26 (m, 3H), 4.26 – 3.95 (m, 5H), 3.95 – 3.20 (m, 32H), 2.66 (dd, *J* = 12.6, 4.4 Hz, 1H), 1.93 (s, 6H), 1.89 (s, 3H), 1.80 (t, *J* = 12.2 Hz, 1H), 1.06 (d, *J* = 6.2 Hz, 3H), 0.97 (d, *J* = 6.2 Hz, 3H).



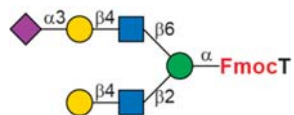

**M312**

HPLC-UV<sub>260nm</sub>, T<sub>R</sub> = 12.99 min

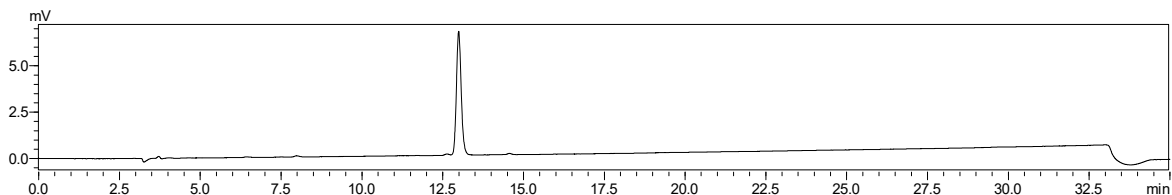

ESI-MS, calculated: 1524.5390; found [M-H]<sup>-</sup> 1523.5249, [M-2H]<sup>2-</sup> 761.2589

312\_180126133712 #69-151 RT: 1.48-3.27 AV: 83 NL: 7.29E4  
T: FTMS - p ESI Full ms [100.00-2000.00]

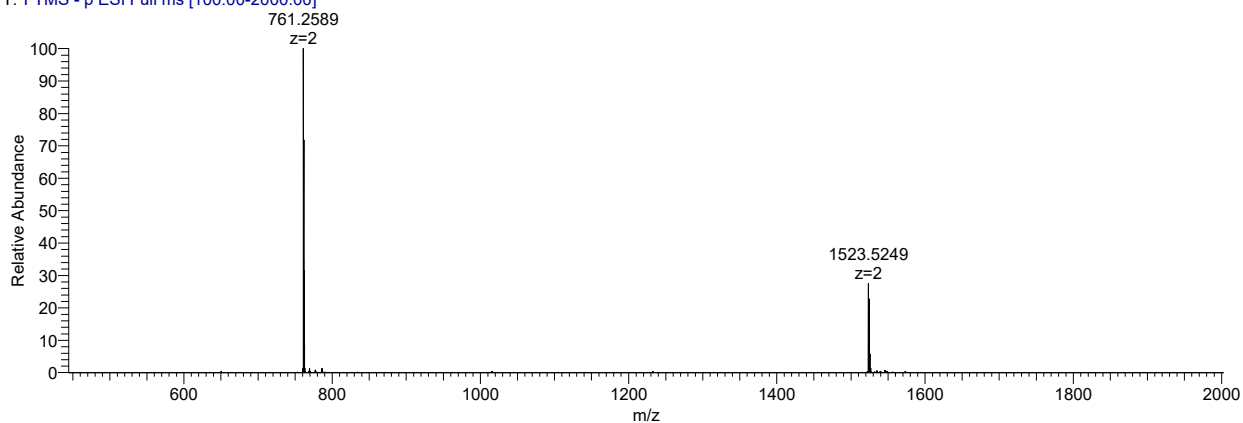

<sup>1</sup>H NMR (600 MHz, D<sub>2</sub>O) δ 7.92 – 7.73 (m, 2H), 7.73 – 7.56 (m, 2H), 7.54 – 7.33 (m, 4H), 4.80 – 4.74 (m, 1H), 4.65 – 4.58 (m, 1H), 4.59 – 4.46 (m, 4H), 4.38 (d, *J* = 7.8 Hz, 2H), 4.34 – 4.23 (m, 2H), 4.19 (d, *J* = 5.0 Hz, 1H), 4.11 (d, *J* = 10.3 Hz, 1H), 3.99 (s, 1H), 3.95 – 3.78 (m, 7H), 3.78 – 3.42 (m, 26H), 3.39 – 3.26 (m, 1H), 2.61 (dd, *J* = 12.4, 4.4 Hz, 1H), 1.97 (s, 6H), 1.96 (s, 3H), 1.66 (t, *J* = 11.9 Hz, 1H), 0.99 (d, *J* = 6.2 Hz, 3H).

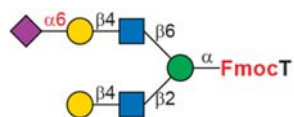

**M313**

HPLC-UV<sub>260nm</sub>, T<sub>R</sub> = 12.98 min

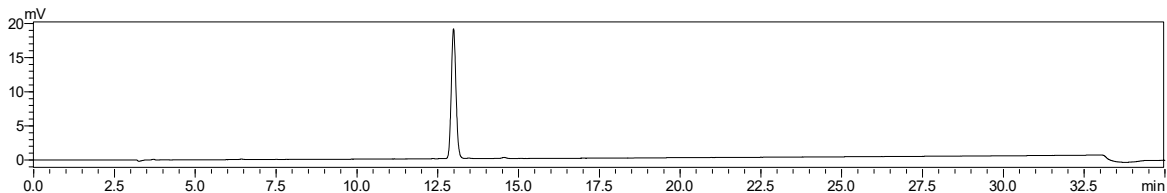

ESI-MS, calculated: 1524.5390; found [M-H]<sup>-</sup> 1523.5148, [M-2H]<sup>2-</sup> 761.2527

MALDI-MS; found [M+H]<sup>+</sup> 1525.527, [M+Na]<sup>+</sup> 1547.527

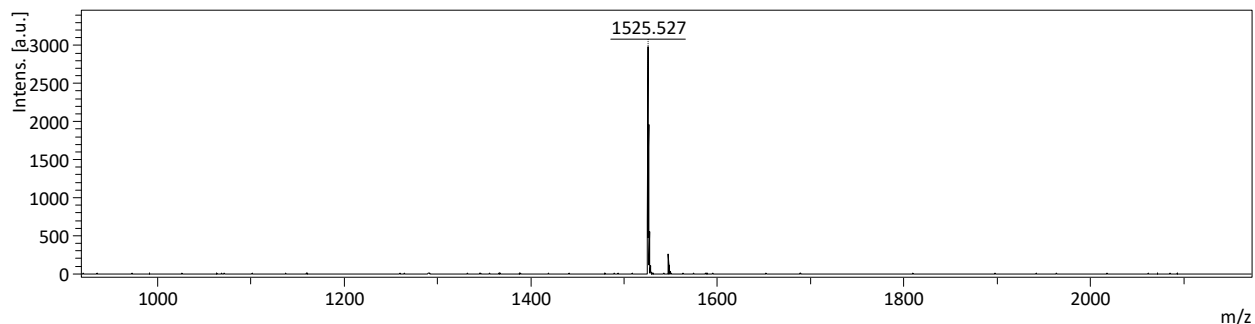

<sup>1</sup>H NMR (600 MHz, D<sub>2</sub>O) δ 7.94 – 7.82 (m, 2H), 7.75 – 7.57 (m, 2H), 7.52 – 7.31 (m, 4H), 4.75 – 4.73 (m, 1H), 4.69 – 4.67 (m, 1H), 4.52 (d, *J* = 7.7 Hz, 2H), 4.44 – 4.35 (m, 2H), 4.35 – 4.25 (m, 2H), 4.18 (d, *J* = 6.4 Hz, 1H), 4.11 (d, *J* = 10.4 Hz, 1H), 3.98 – 3.89 (m, 2H), 3.89 – 3.78 (m, 6H), 3.78 – 3.42 (m, 28H), 3.33 – 3.26 (m, 1H), 2.61 (dd, *J* = 12.8, 4.3 Hz, 1H), 1.98 (s, 6H), 1.96 (s, 3H), 1.65 (t, *J* = 11.9 Hz, 1H), 0.96 (d, *J* = 5.7 Hz, 3H).

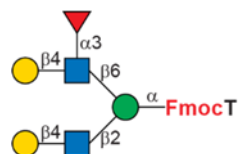

**M314**

HPLC-UV<sub>260nm</sub>, T<sub>R</sub> = 13.65 min

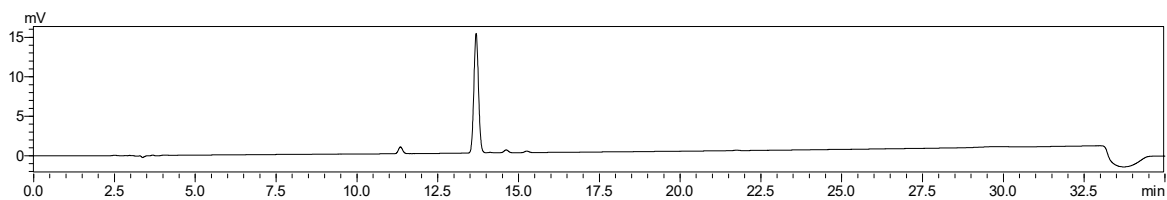

ESI-MS, calculated: 1379.5014; found [M-H]<sup>-</sup> 1378.4948

314\_180126125846 #58 RT: 1.24 AV: 1 NL: 7.43E3  
T: FTMS - p ESI Full ms [100.00-2000.00]

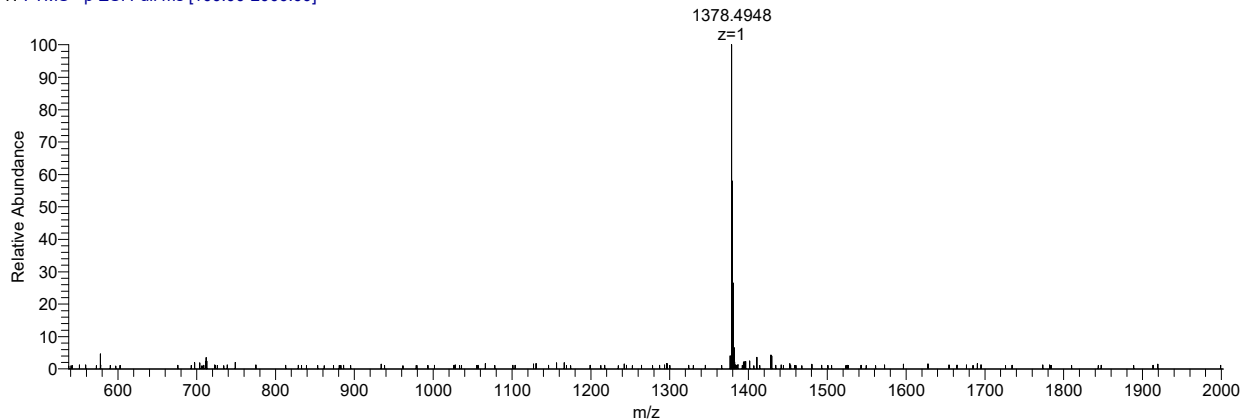

<sup>1</sup>H NMR (600 MHz, D<sub>2</sub>O) δ 7.89 – 7.78 (m, 2H), 7.70 – 7.53 (m, 2H), 7.49 – 7.28 (m, 4H), 5.02 (d, *J* = 3.8 Hz, 1H), 4.76 – 4.74 (m, 1H), 4.69 – 4.67 (m, 1H), 4.54 – 4.46 (m, 2H), 4.35 (d, *J* = 8.2 Hz, 2H), 4.32 – 4.17 (m, 4H), 4.09 (d, *J* = 10.0 Hz, 1H), 4.04 (s, 1H), 3.91 (d, *J* = 11.2 Hz, 2H), 3.88 – 3.69 (m, 10H), 3.69 – 3.46 (m, 14H), 3.46 – 3.26 (m, 6H), 1.96 (s, 3H), 1.93 (s, 3H), 1.10 (d, *J* = 6.5 Hz, 3H), 0.99 (d, *J* = 6.3 Hz, 3H).

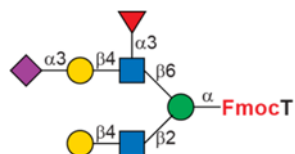

**M315**

HPLC-UV<sub>260nm</sub>, T<sub>R</sub> = 12.05 min

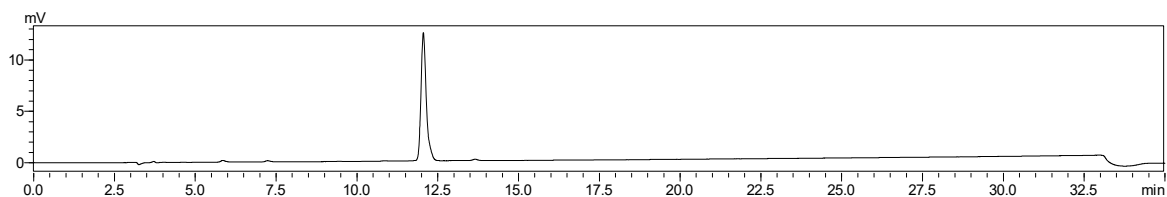

ESI-MS, calculated: 1670.5969; found [M-H]<sup>-</sup> 1669.5717, [M-2H]<sup>2-</sup> 834.2809

MALDI-MS; found [M+H]<sup>+</sup> 1669.519

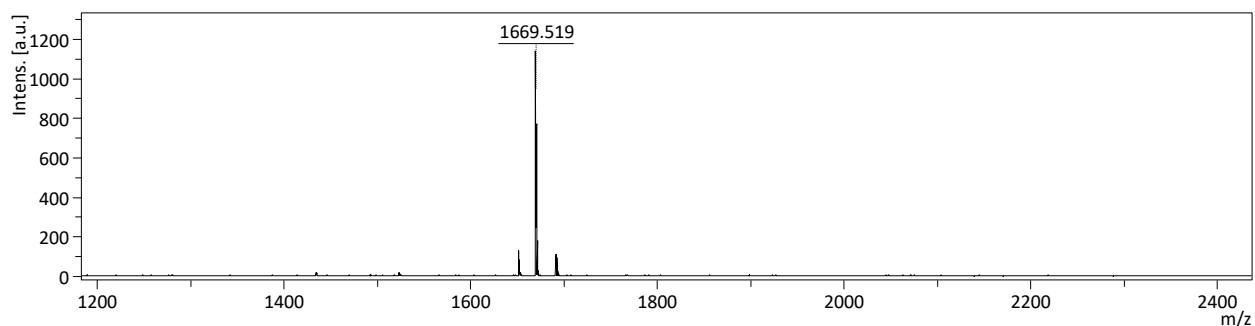

<sup>1</sup>H NMR (600 MHz, D<sub>2</sub>O) δ 7.88 – 7.74 (m, 2H), 7.69 – 7.50 (m, 2H), 7.47 – 7.30 (m, 4H), 5.01 (d, *J* = 3.4 Hz, 1H), 4.83 – 4.79 (m, 1H), 4.65 – 4.63 (m, 1H), 4.53 – 4.31 (m, 5H), 4.29 – 4.17 (m, 3H), 4.16 – 4.00 (m, 3H), 3.98 – 3.37 (m, 37H), 3.31 (t, *J* = 10.4 Hz, 1H), 2.69 (dd, *J* = 12.7, 4.4 Hz, 1H), 1.96 (s, 3H), 1.95 (s, 3H), 1.91 (s, 3H), 1.81 (t, *J* = 12.3 Hz, 1H), 1.09 (d, *J* = 6.0 Hz, 3H), 0.99 (d, *J* = 6.3 Hz, 3H).

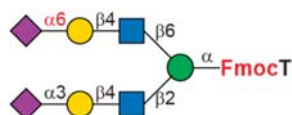

**M323**

HPLC-FL,  $T_R = 11.67$  min

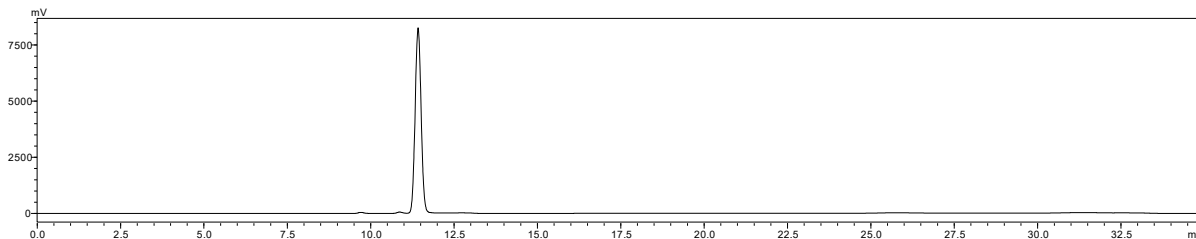

ESI-MS, calculated: 1815.6344; found  $[M-H]^-$  1814.6059,  $[M-2H]^{2-}$  906.7983

323\_171027003912 #69-151 RT: 1.48-3.27 AV: 83 NL: 2.91E3  
T: FTMS - p ESI Full ms [100.00-2000.00]

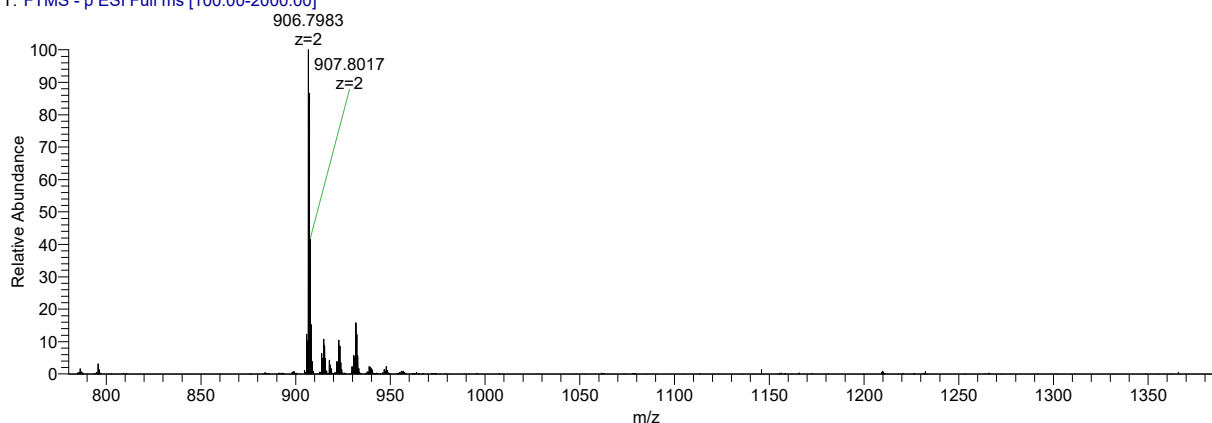

$^1H$  NMR (600 MHz,  $D_2O$ )  $\delta$  7.90 – 7.76 (m, 2H), 7.67 – 7.52 (m, 2H), 7.48 – 7.29 (m, 4H), 4.74 – 4.72 (m, 1H), 4.69 – 4.67 (m, 1H), 4.54 (d,  $J = 14.9$  Hz, 2H), 4.50 (d,  $J = 8.1$  Hz, 1H), 4.46 (d,  $J = 7.8$  Hz, 1H), 4.36 (d,  $J = 7.8$  Hz, 1H), 4.32 – 4.18 (m, 3H), 4.16 – 4.03 (m, 3H), 4.05 – 3.36 (m, 40H), 3.31 (t,  $J = 9.8$  Hz, 1H), 2.80 – 2.63 (m, 1H), 2.62 – 2.53 (m, 1H), 1.96 (s, 9H), 1.95 (s, 3H), 1.80 (t,  $J = 12.1$  Hz, 1H), 1.77 – 1.68 (m, 1H), 1.01 (d,  $J = 6.2$  Hz, 3H).

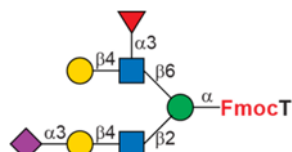

**M324**

HPLC-FL,  $T_R = 12.52$  min

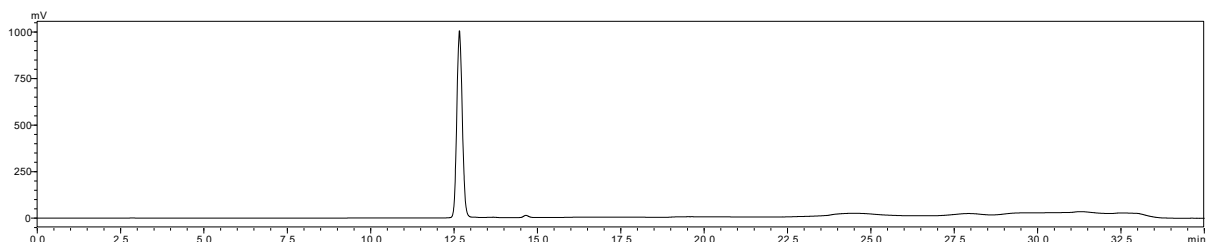

ESI-MS, calculated: 1670.5969; found  $[M-H]^-$  1669.5715,  $[M-2H]^{2-}$  834.2804

MALDI-MS, found  $[M+Na]^+$  1693.566,  $[M+K]^+$  1709.538

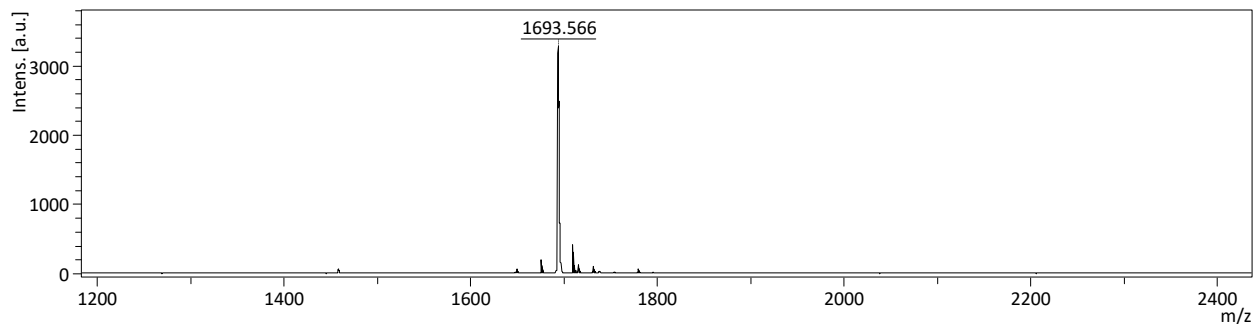

$^1H$  NMR (600 MHz,  $D_2O$ )  $\delta$  7.90 – 7.78 (m, 2H), 7.71 – 7.54 (m, 2H), 7.52 – 7.30 (m, 4H), 5.01 (d,  $J = 3.8$  Hz, 1H), 4.58 – 4.52 (m, 2H), 4.49 (d,  $J = 8.0$  Hz, 1H), 4.45 (d,  $J = 7.7$  Hz, 2H), 4.35 (d,  $J = 8.1$  Hz, 2H), 4.27 (d,  $J = 6.8$  Hz, 2H), 4.20 (d,  $J = 5.5$  Hz, 1H), 4.14 – 4.02 (m, 3H), 3.99 – 3.55 (m, 28H), 3.54 – 3.44 (m, 5H), 3.44 – 3.36 (m, 2H), 3.31 (t,  $J = 9.7$  Hz, 1H), 2.68 (dd,  $J = 11.9, 3.4$  Hz, 1H), 1.96 (s, 3H), 1.95 (s, 3H), 1.92 (s, 3H), 1.80 (t,  $J = 12.5$  Hz, 1H), 1.09 (d,  $J = 6.5$  Hz, 3H), 0.99 (d,  $J = 6.2$  Hz, 3H).

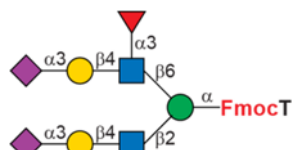

**M325**

HPLC-FL,  $T_R = 11.02$  min

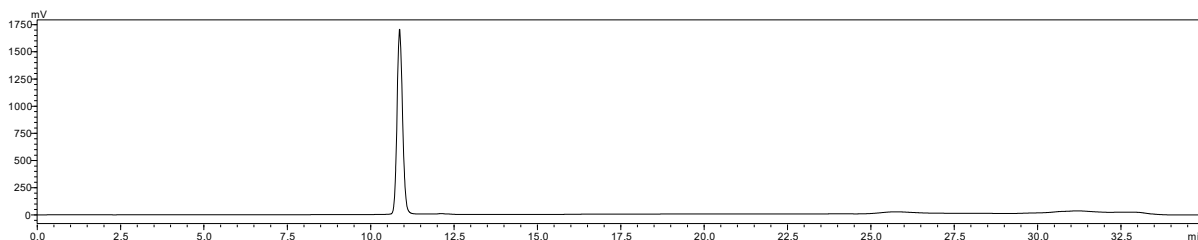

ESI-MS, calculated: 1961.6923; found  $[M-H]^-$  1960.6640,  $[M-2H]^{2-}$  979.8271

325\_171027013045 #69-151 RT: 1.48-3.27 AV: 83 NL: 6.62E3  
T: FTMS - p ESI Full ms [100.00-2000.00]

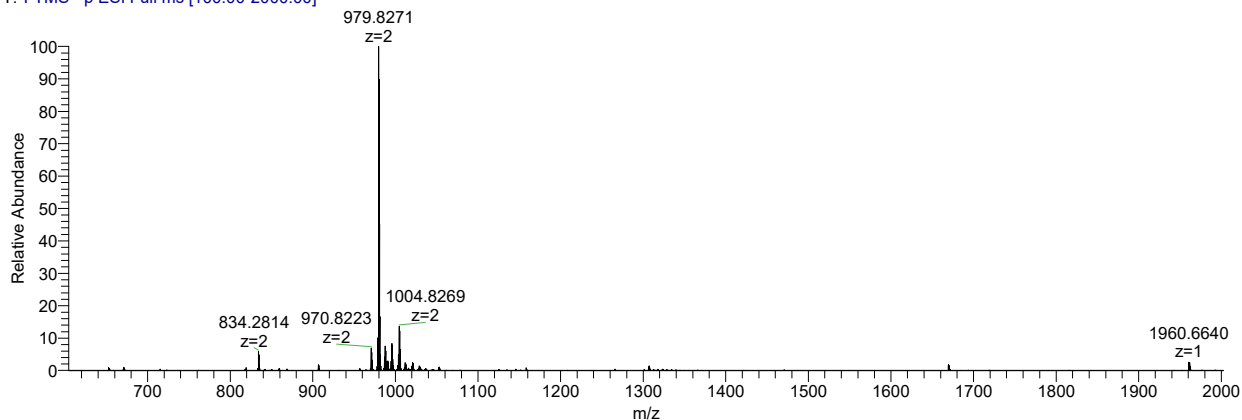

$^1H$  NMR (600 MHz,  $D_2O$ )  $\delta$  7.92 – 7.78 (m, 2H), 7.74 – 7.53 (m, 2H), 7.48 – 7.30 (m, 4H), 5.02 (d,  $J = 4.0$  Hz, 1H), 4.55 (dd,  $J = 8.8, 4.4$  Hz, 1H), 4.53 – 4.42 (m, 3H), 4.37 (dd,  $J = 17.1, 7.9$  Hz, 2H), 4.34 – 4.24 (m, 2H), 4.24 – 4.15 (m, 1H), 4.15 – 3.99 (m, 4H), 3.99 – 3.39 (m, 42H), 3.31 (t,  $J = 9.7$  Hz, 1H), 2.75 – 2.62 (m, 2H), 1.96 (s, 3H), 1.95 (s, 3H), 1.92 (s, 6H), 1.77 (t,  $J = 12.4$  Hz, 2H), 1.09 (d,  $J = 6.3$  Hz, 3H), 0.99 (d,  $J = 6.2$  Hz, 3H).

M334

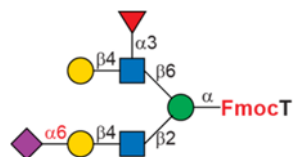

HPLC-UV<sub>260nm</sub>, T<sub>R</sub> = 12.58 min

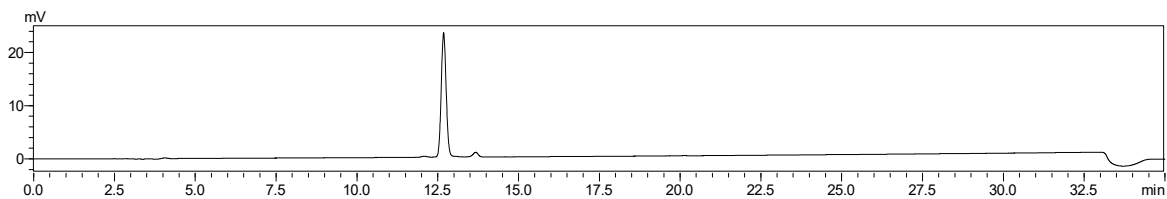

ESI-MS, calculated: 1670.5969; found [M-H]<sup>-</sup> 1669.5713, [M-2H]<sup>2-</sup> 834.2806

MALDI-MS, found [M+Na]<sup>+</sup> 1693.567, [M+K]<sup>+</sup> 1709.894

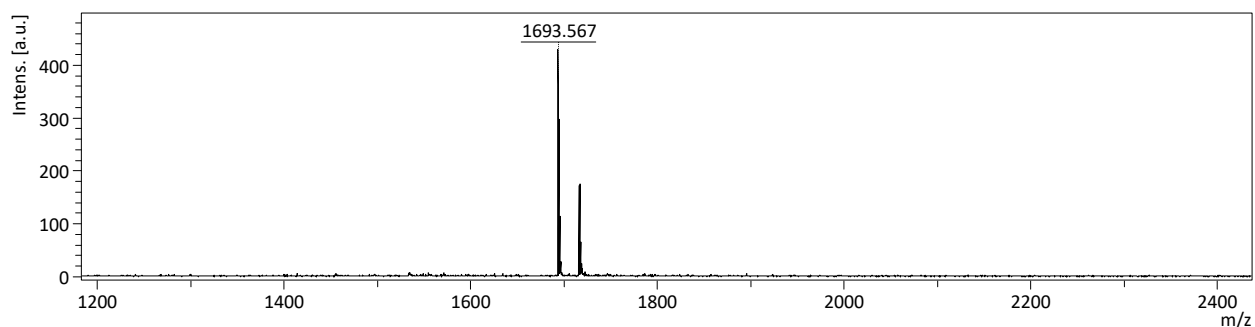

<sup>1</sup>H NMR (600 MHz, D<sub>2</sub>O) δ 7.91 – 7.78 (m, 2H), 7.72 – 7.53 (m, 2H), 7.52 – 7.29 (m, 4H), 5.02 (d, *J* = 3.7 Hz, 1H), 4.58 – 4.51 (m, 2H), 4.49 (d, *J* = 7.2 Hz, 1H), 4.41 – 4.33 (m, 2H), 4.31 – 4.17 (m, 3H), 4.16 – 4.05 (m, 2H), 4.01 – 3.44 (m, 36H), 3.44 – 3.37 (m, 2H), 3.31 (t, *J* = 9.9 Hz, 1H), 2.57 (dd, *J* = 12.7, 2.6 Hz, 1H), 1.97 (s, 3H), 1.96 (s, 3H), 1.92 (s, 3H), 1.73 (t, *J* = 12.3 Hz, 1H), 1.09 (d, *J* = 6.4 Hz, 3H), 1.00 (d, *J* = 6.3 Hz, 3H).



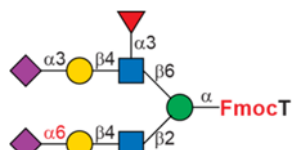

**M335**

HPLC-FL,  $T_R = 11.33$  min

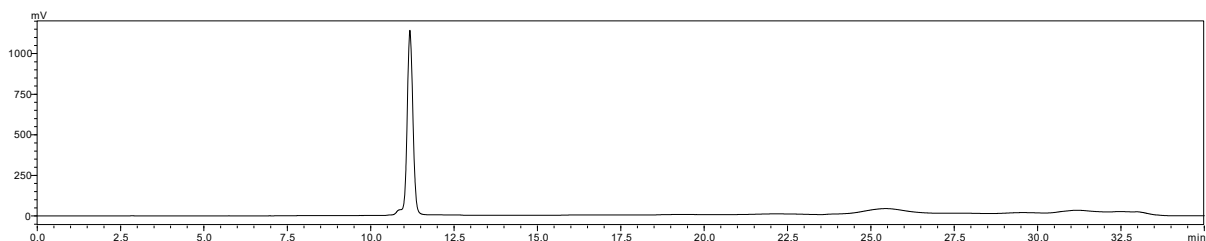

ESI-MS, calculated: 1961.6923; found  $[M-H]^-$  1960.6671,  $[M-2H]^{2-}$  979.8270

335\_171027014342 #69-151 RT: 1.48-3.27 AV: 83 NL: 3.78E3  
T: FTMS - p ESI Full ms [100.00-2000.00]

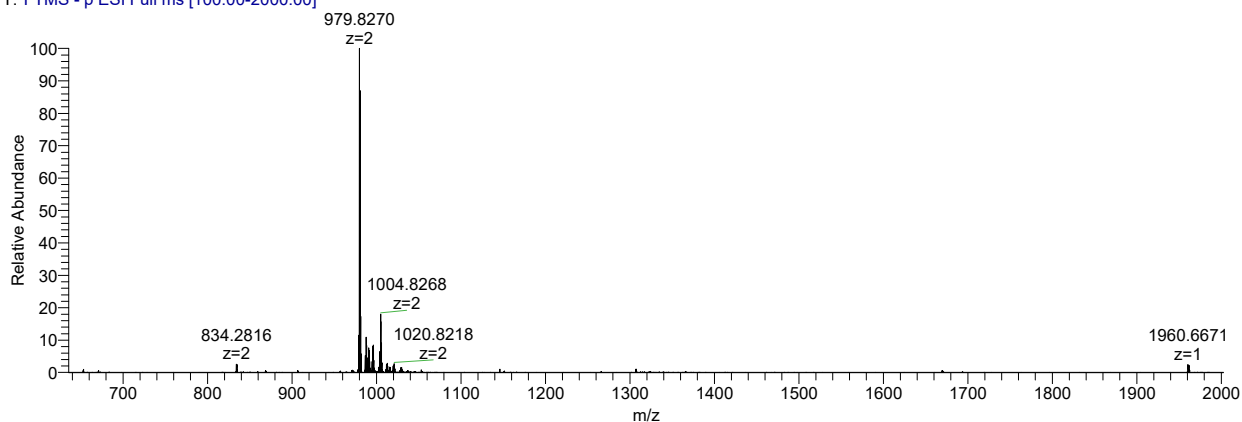

$^1\text{H}$  NMR (600 MHz,  $\text{D}_2\text{O}$ )  $\delta$  7.93 – 7.79 (m, 2H), 7.74 – 7.56 (m, 2H), 7.51 – 7.31 (m, 4H), 5.02 (d,  $J = 3.7$  Hz, 1H), 4.60 – 4.53 (m, 1H), 4.53 – 4.43 (m, 2H), 4.43 – 4.34 (m, 2H), 4.34 – 4.25 (m, 1H), 4.21 (d,  $J = 2.7$  Hz, 1H), 4.17 – 4.06 (m, 2H), 4.01 (d,  $J = 9.6$  Hz, 1H), 3.93 (d,  $J = 10.0$  Hz, 2H), 3.90 – 3.38 (m, 46H), 3.31 (t,  $J = 9.8$  Hz, 1H), 2.70 (dd,  $J = 12.3, 4.5$  Hz, 1H), 2.59 (dd,  $J = 12.4, 4.4$  Hz, 1H), 1.98 (s, 3H), 1.96 (s, 6H), 1.92 (s, 3H), 1.76 (t,  $J = 11.9$  Hz, 1H), 1.72 – 1.64 (m, 1H), 1.09 (d,  $J = 6.5$  Hz, 3H), 0.99 (d,  $J = 6.2$  Hz, 3H).

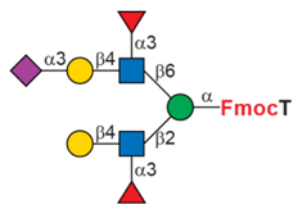

**M345**

HPLC-UV<sub>260nm</sub>, T<sub>R</sub> = 12.06 min

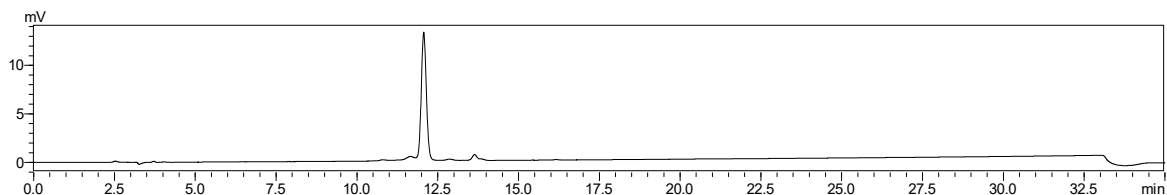

ESI-MS, calculated: 1816.6548; found [M-H]<sup>-</sup> 1815.6285, [M-2H]<sup>2-</sup> 907.3094

345\_171027015637 #69-151 RT: 1.48-3.27 AV: 83 NL: 3.24E3  
T: FTMS - p ESI Full ms [100.00-2000.00]

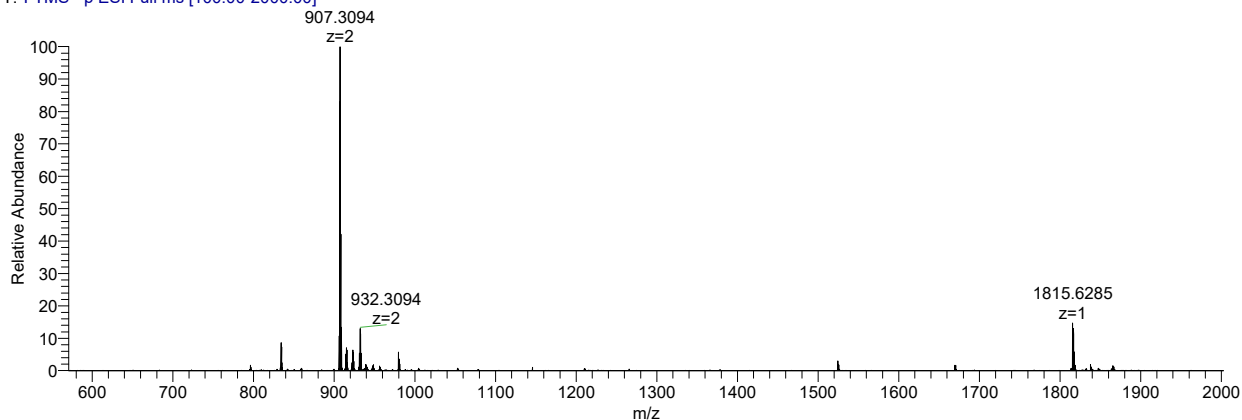

<sup>1</sup>H NMR (600 MHz, D<sub>2</sub>O) δ 7.94 – 7.79 (m, 2H), 7.77 – 7.54 (m, 2H), 7.51 – 7.30 (m, 4H), 5.03 (d, *J* = 4.1 Hz, 2H), 4.57 – 4.52 (m, 1H), 4.52 – 4.43 (m, 1H), 4.37 (dd, *J* = 14.6, 7.7 Hz, 2H), 4.33 – 4.25 (m, 1H), 4.21 (dd, *J* = 6.3, 2.3 Hz, 1H), 4.13 – 4.07 (m, 1H), 4.07 – 3.98 (m, 1H), 3.93 (d, *J* = 10.7 Hz, 1H), 3.90 – 3.54 (m, 32H), 3.54 – 3.38 (m, 10H), 3.31 (t, *J* = 9.7 Hz, 1H), 2.70 (dd, *J* = 12.5, 4.5 Hz, 1H), 1.96 (s, 3H), 1.95 (s, 3H), 1.92 (s, 3H), 1.77 (t, *J* = 12.1 Hz, 1H), 1.15 – 1.05 (m, 6H), 0.99 (d, *J* = 6.3 Hz, 3H).

## V. NMR spectra

### $^1\text{H}$ NMR of Compound 1

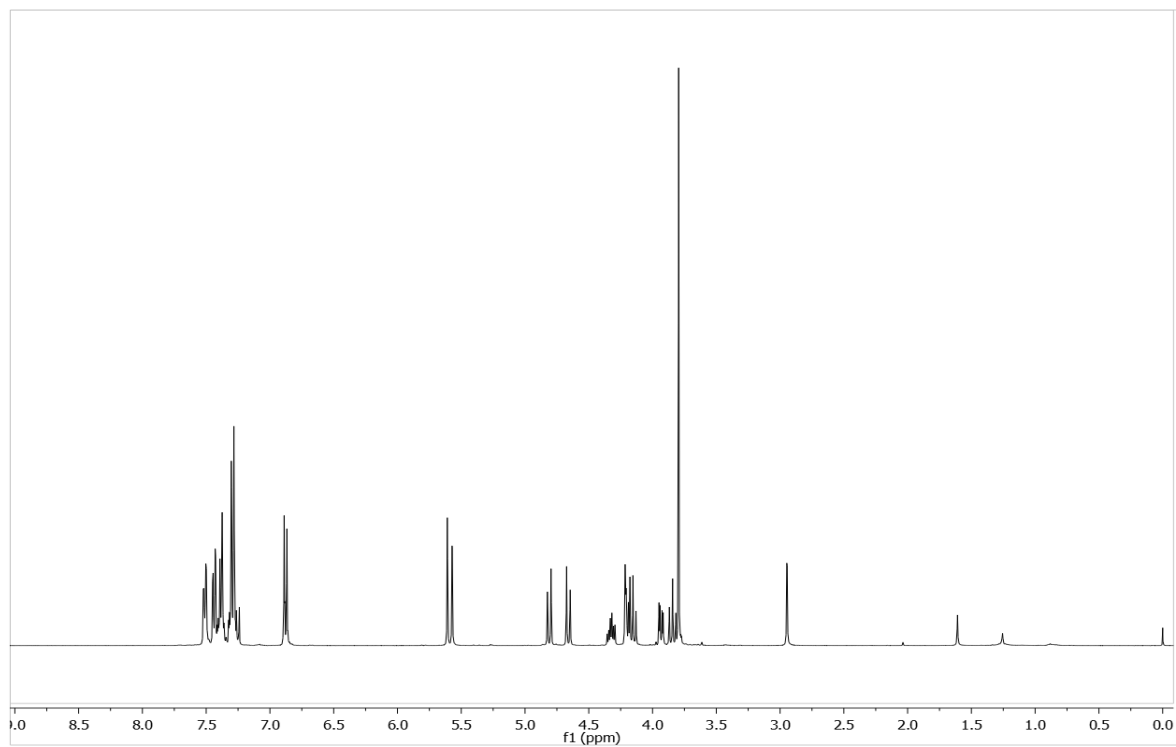

### $^{13}\text{C}$ NMR of Compound 1

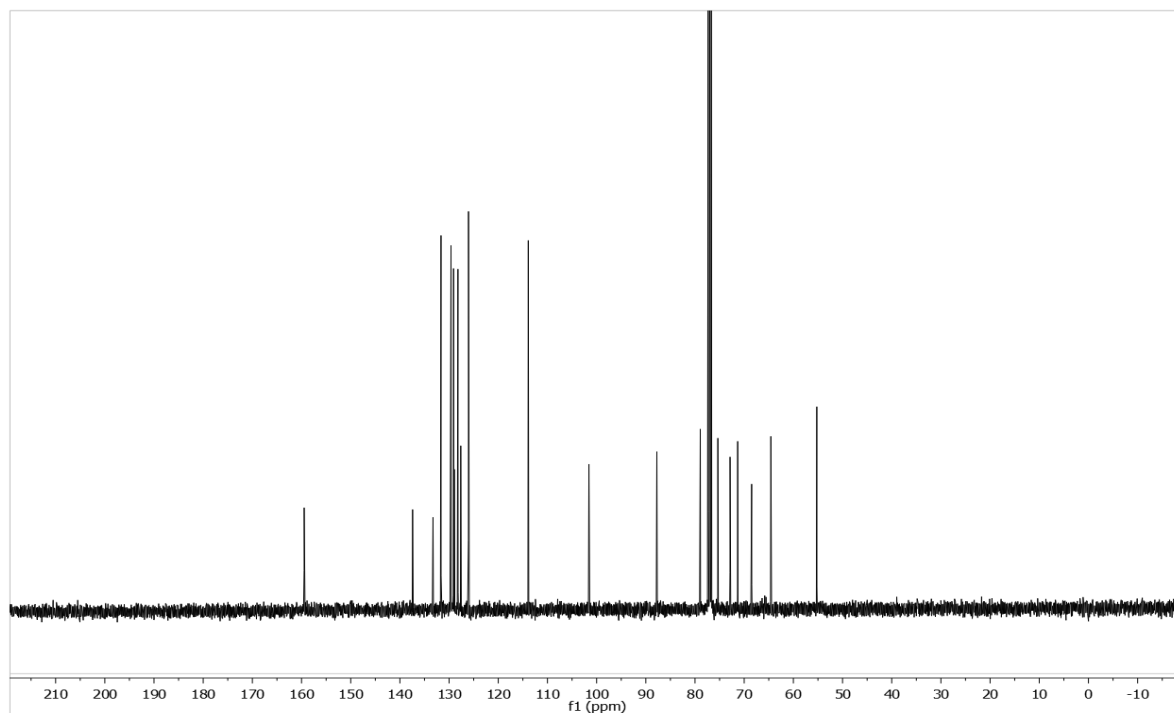

$^1\text{H}$  NMR of Compound 5

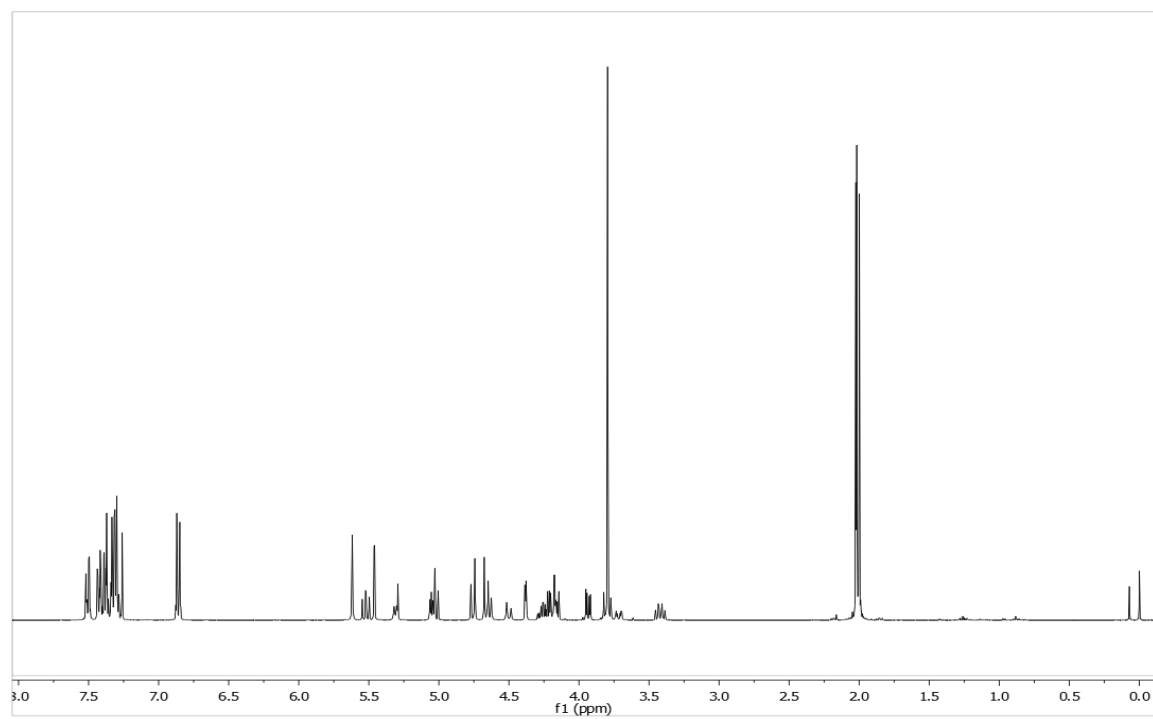

$^{13}\text{C}$  NMR of Compound 5

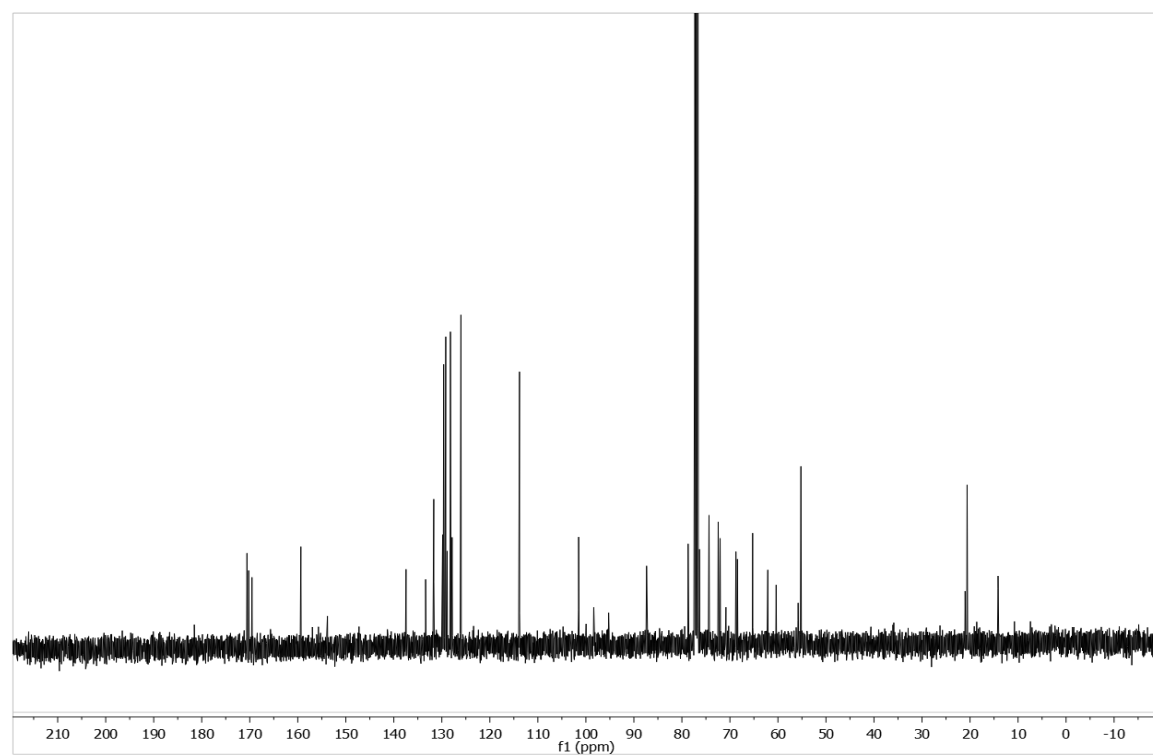

$^1\text{H}$  NMR of Compound 6

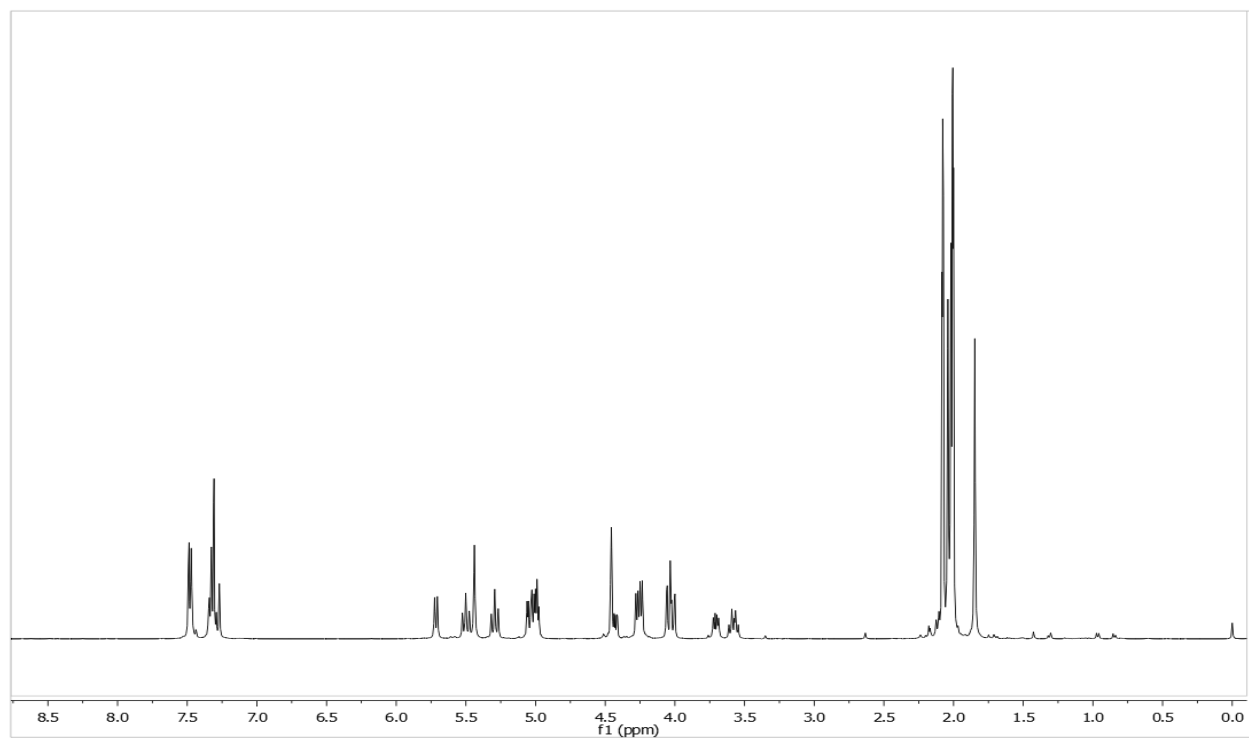

$^{13}\text{C}$  NMR spectrum of Compound 6

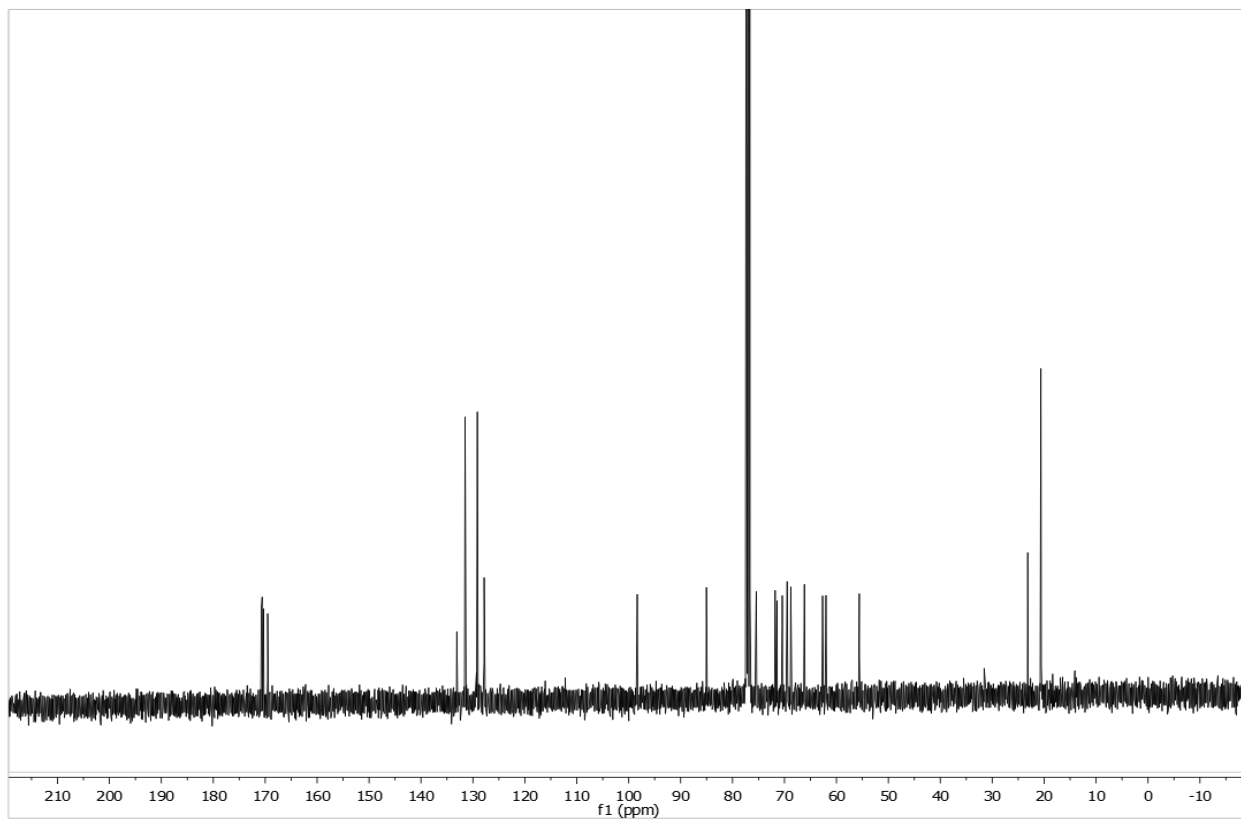

$^1\text{H}$  NMR of Compound 7

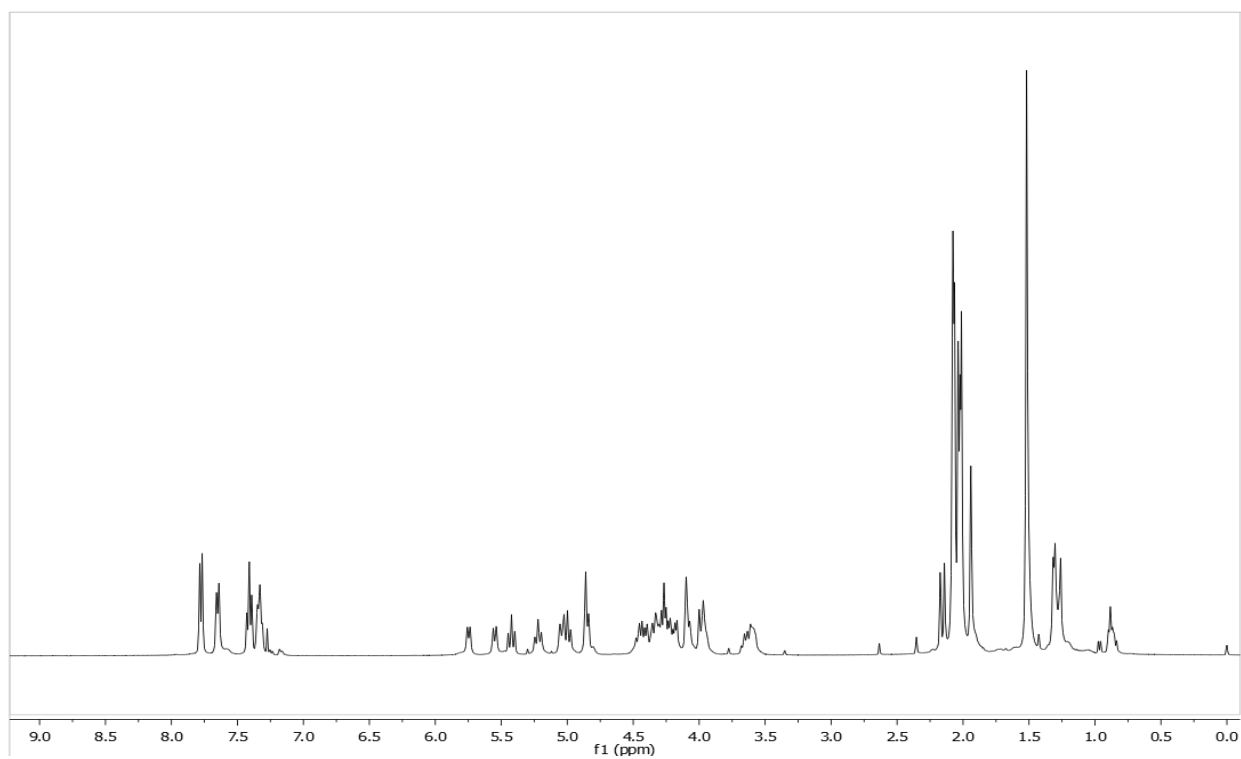

$^{13}\text{C}$  NMR of Compound 7

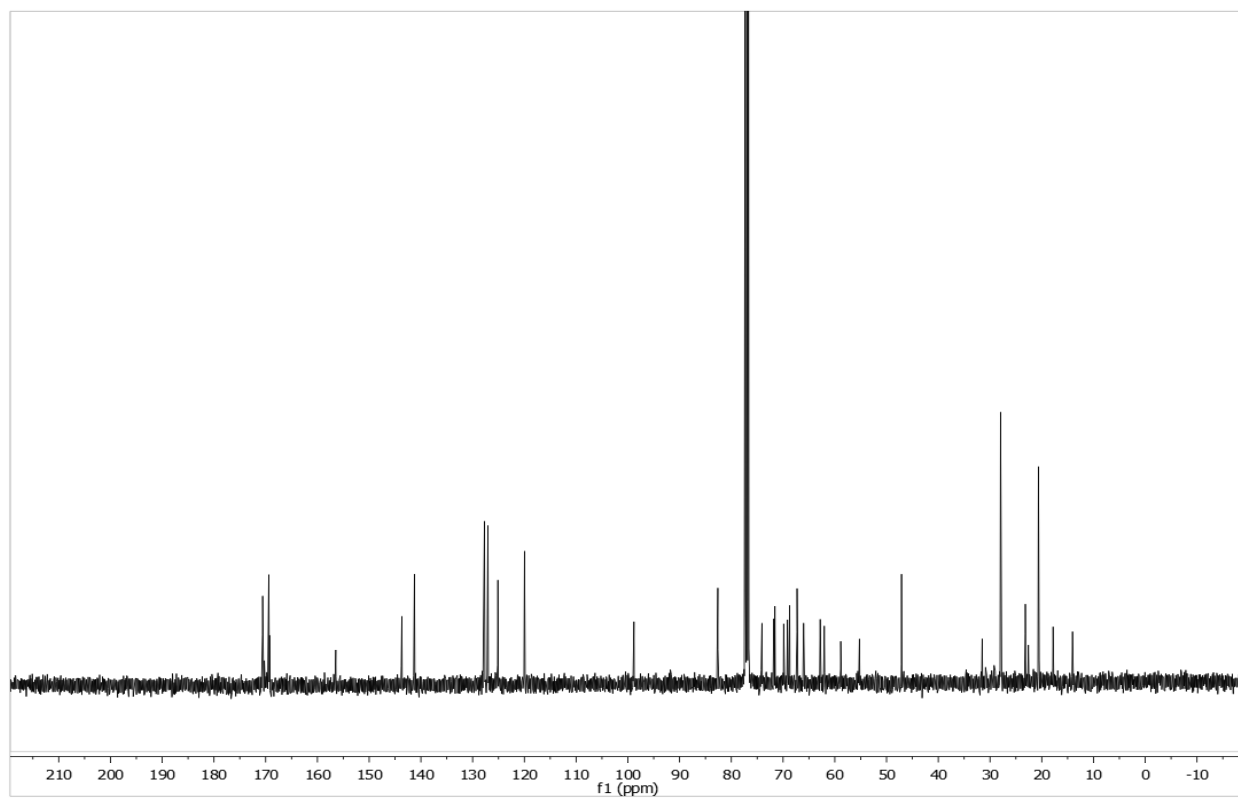

$^1\text{H}$  NMR of Compound 8 (M100)

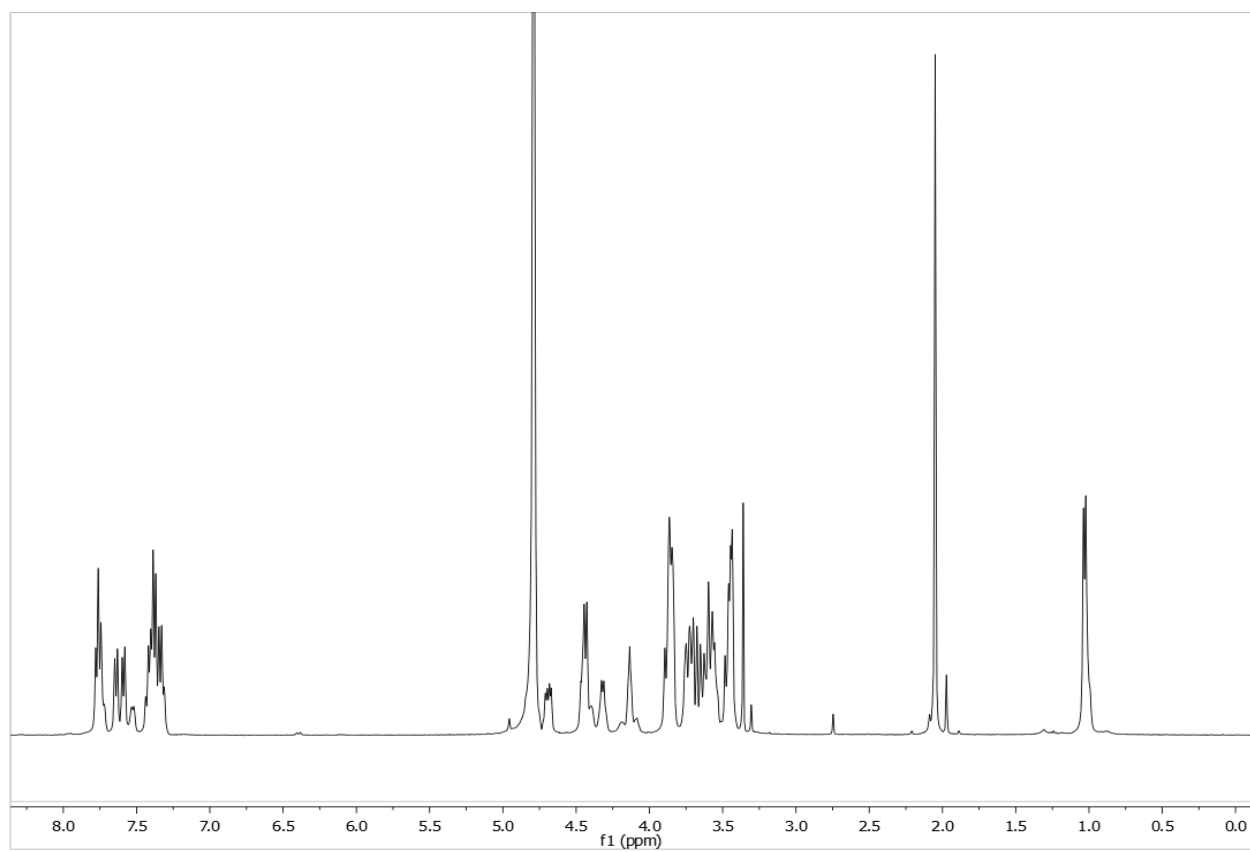

$^{13}\text{C}$  NMR of Compound 8 (M100)

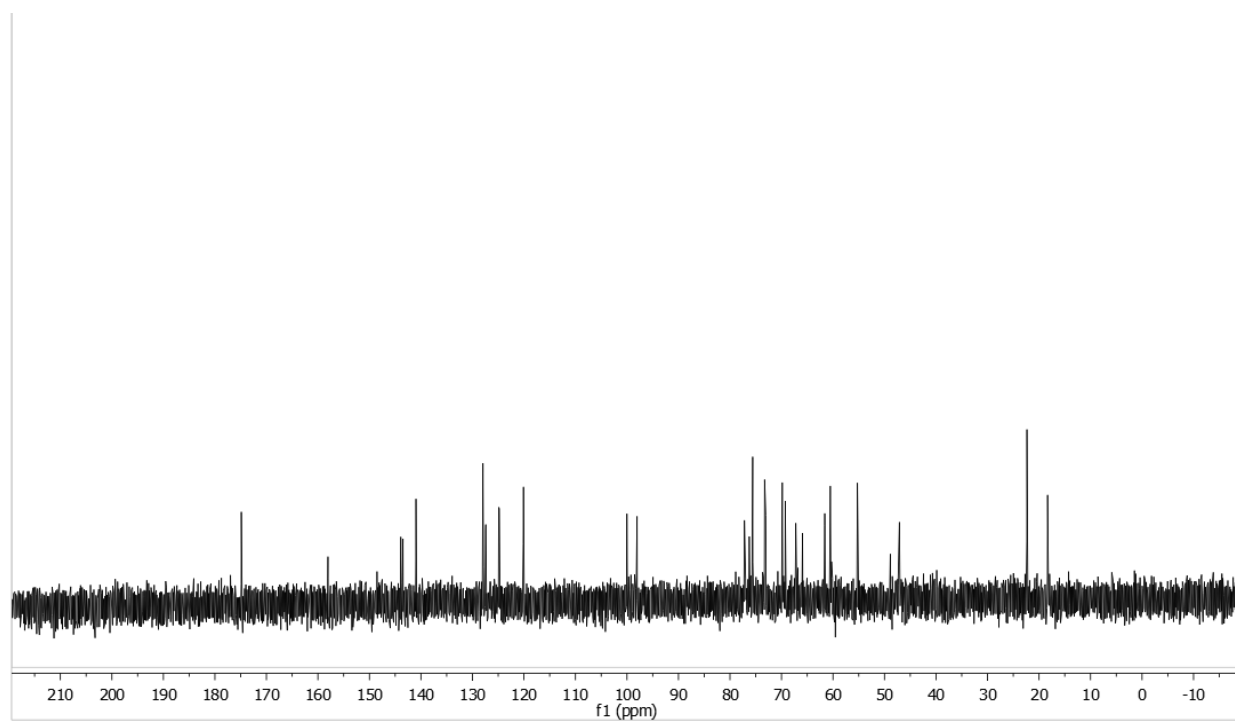

$^1\text{H}$  NMR of Compound 9

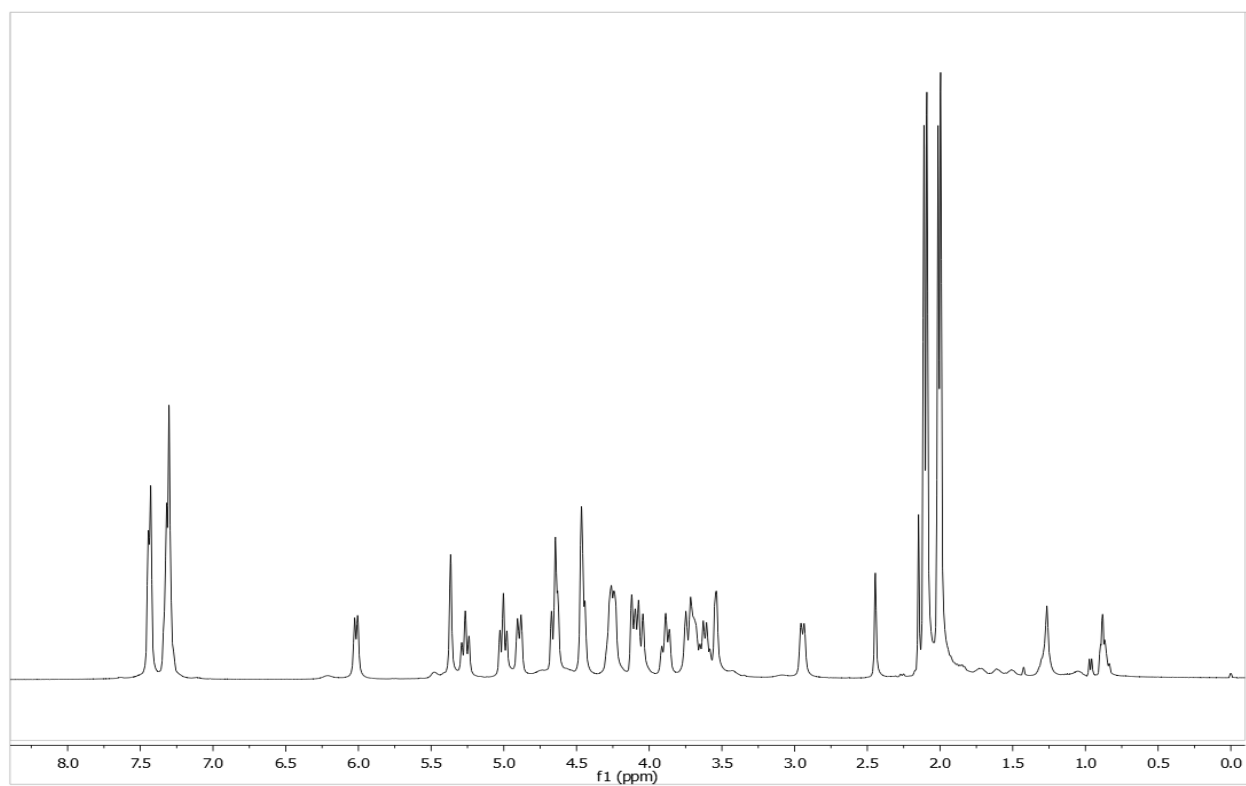

$^{13}\text{C}$  NMR of Compound 9

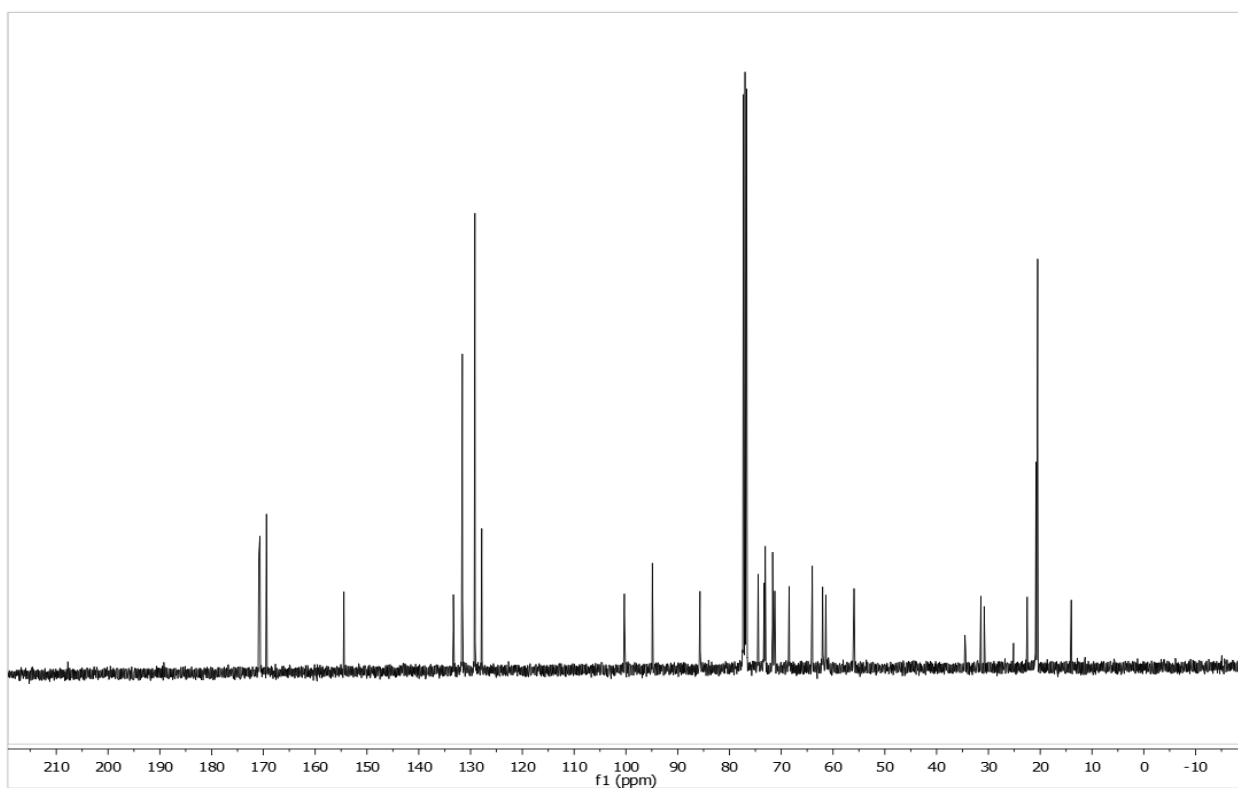



$^1\text{H}$  NMR of Compound 10

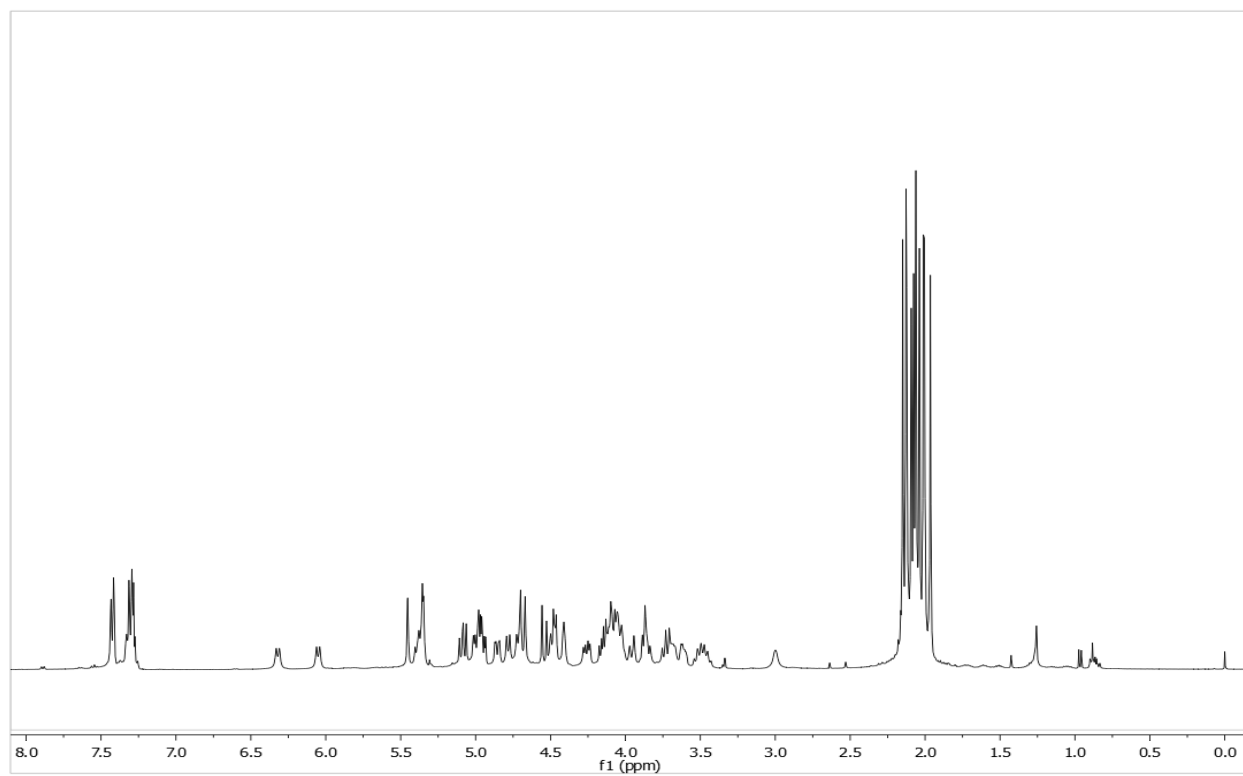

$^{13}\text{C}$  NMR of Compound 10

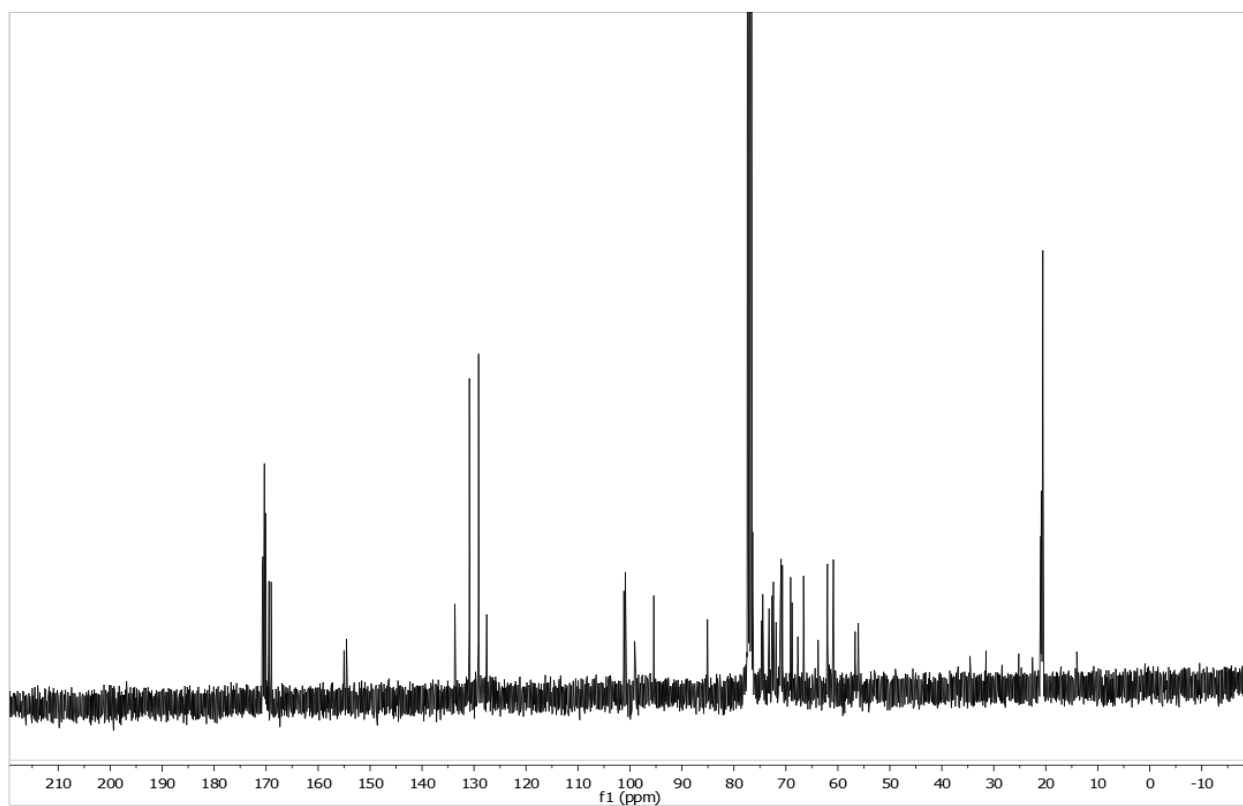

$^1\text{H}$  NMR of Compound 11

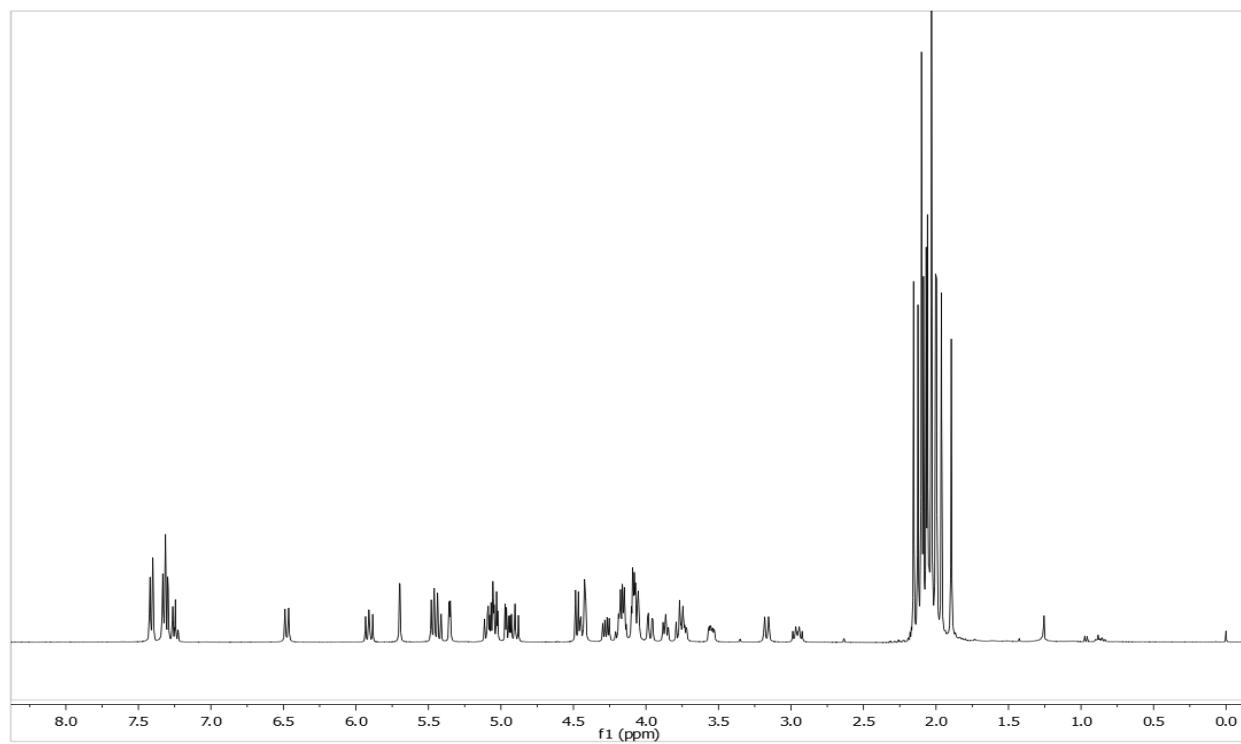

$^{13}\text{C}$  NMR of Compound 11

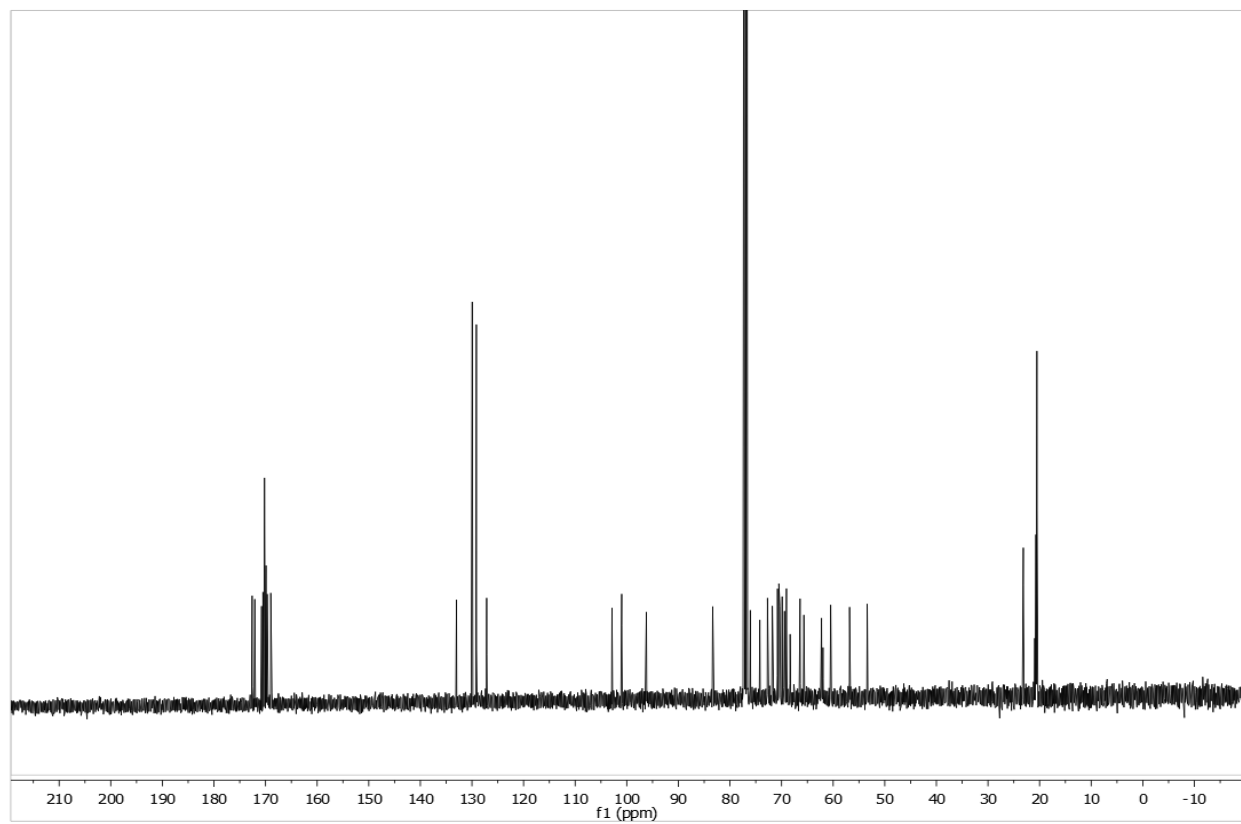

$^1\text{H}$  NMR of Compound 12

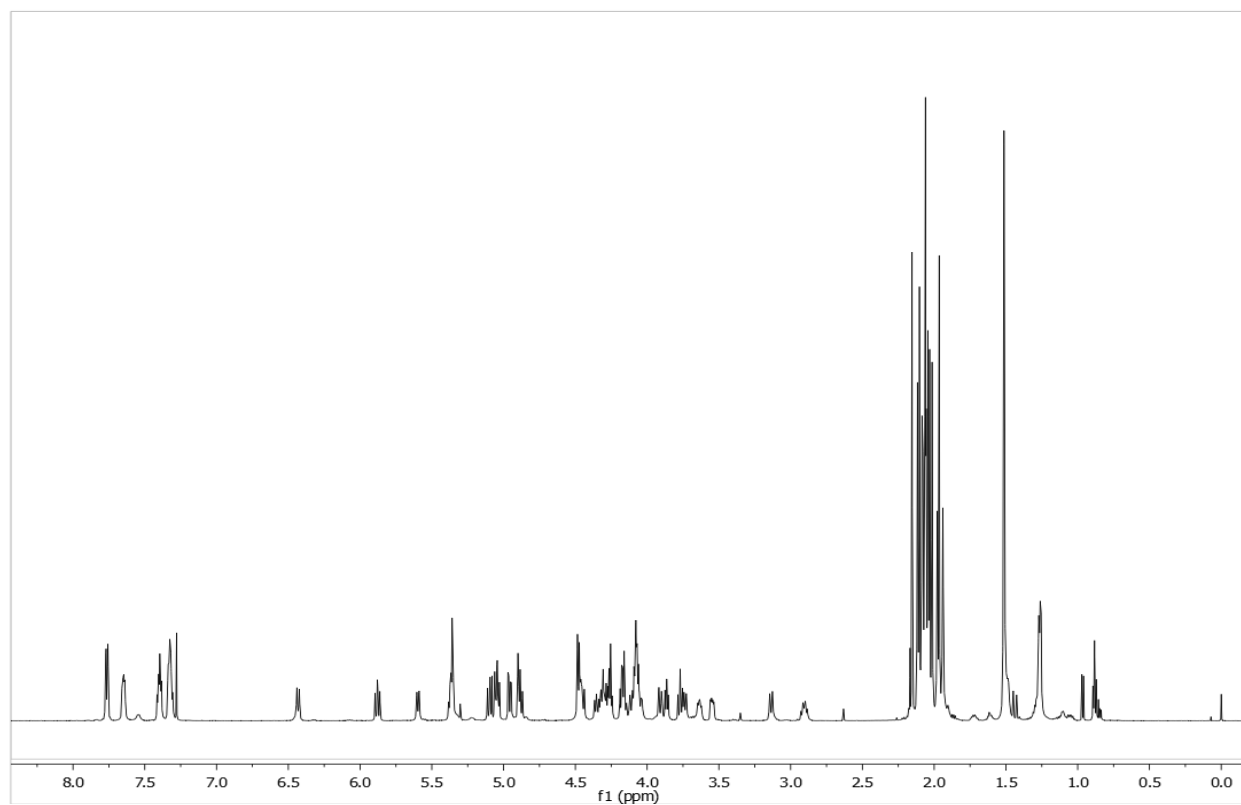

$^{13}\text{C}$  NMR of Compound 12

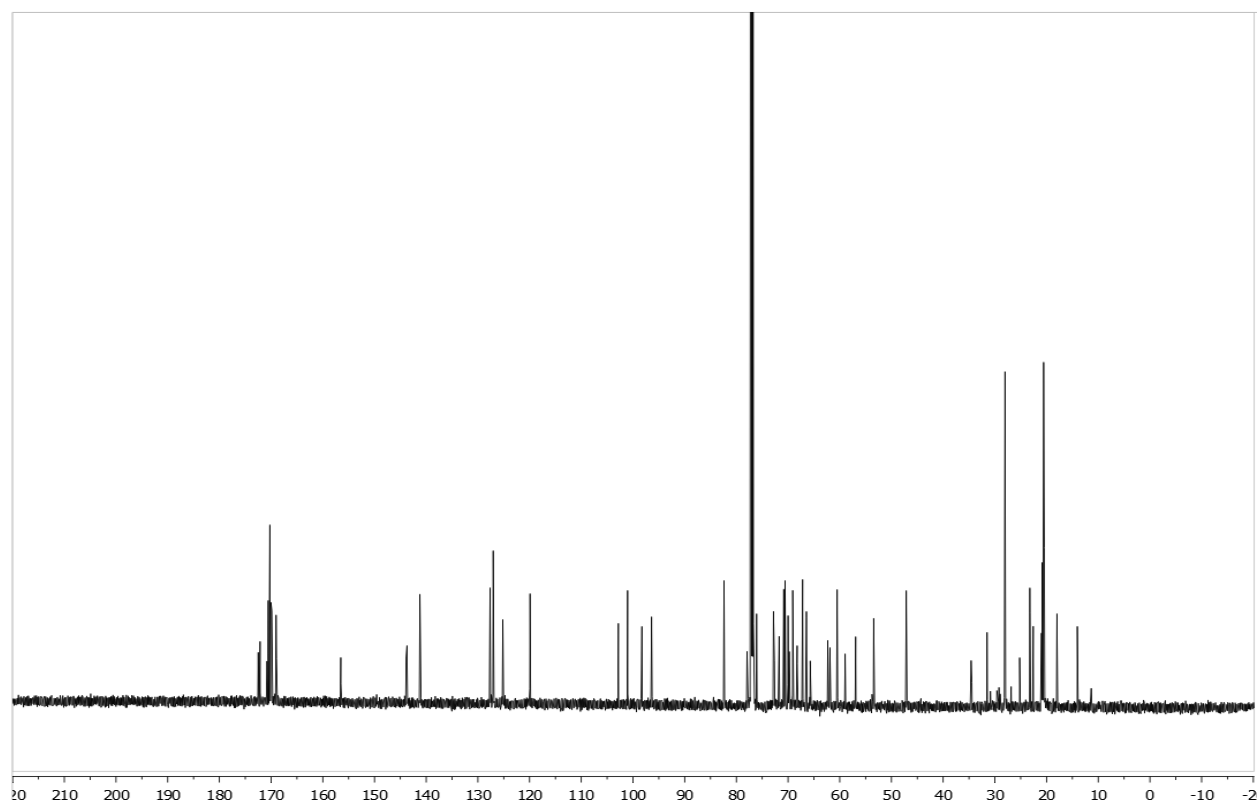

$^1\text{H}$  NMR of Compound 13 (M301)

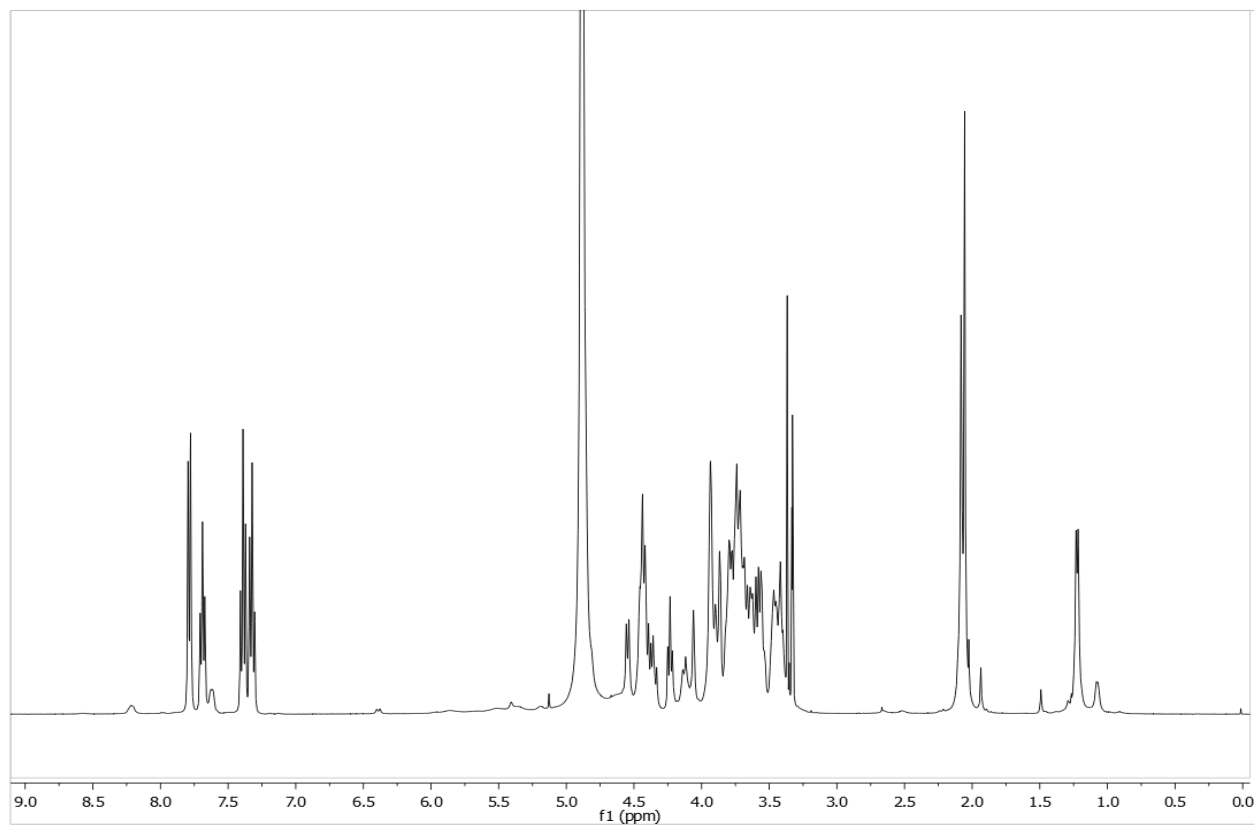

$^{13}\text{C}$  NMR of Compound 13 (M301)

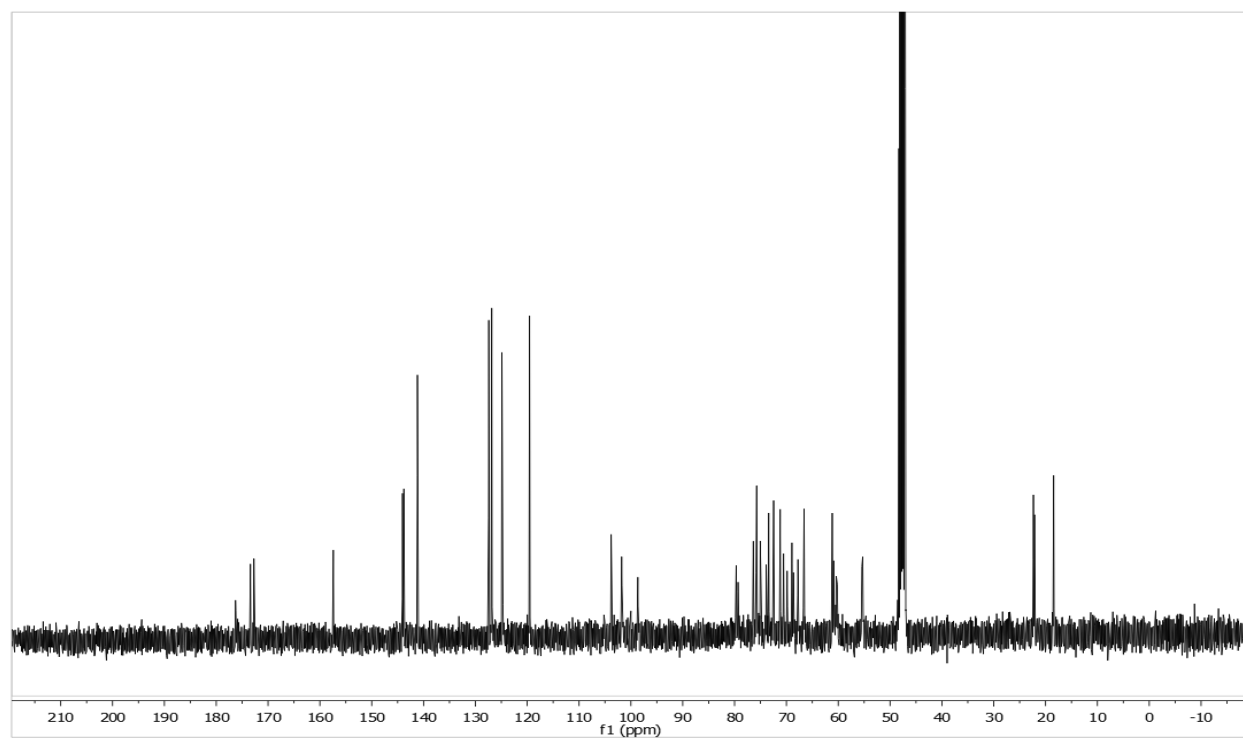

$^1\text{H}$  NMR of Compound 14

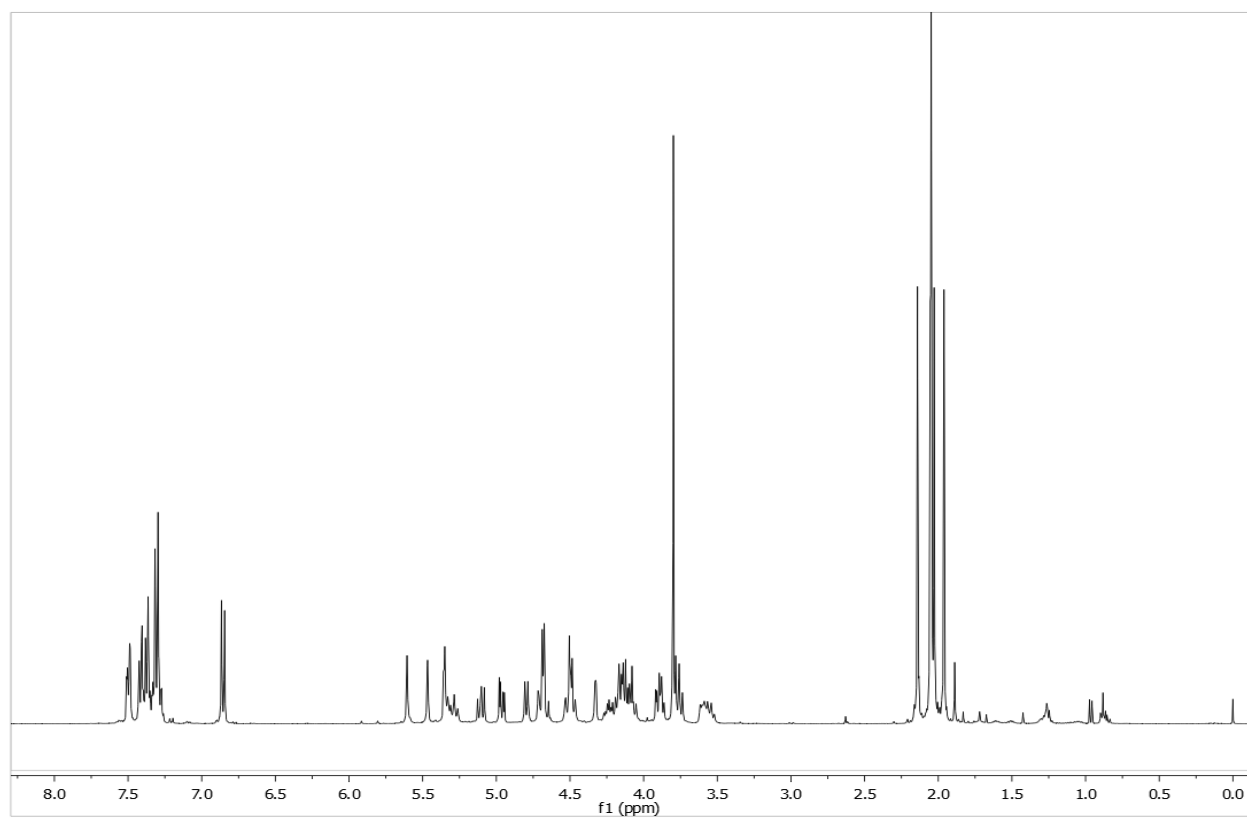

$^{13}\text{C}$  NMR of Compound 14

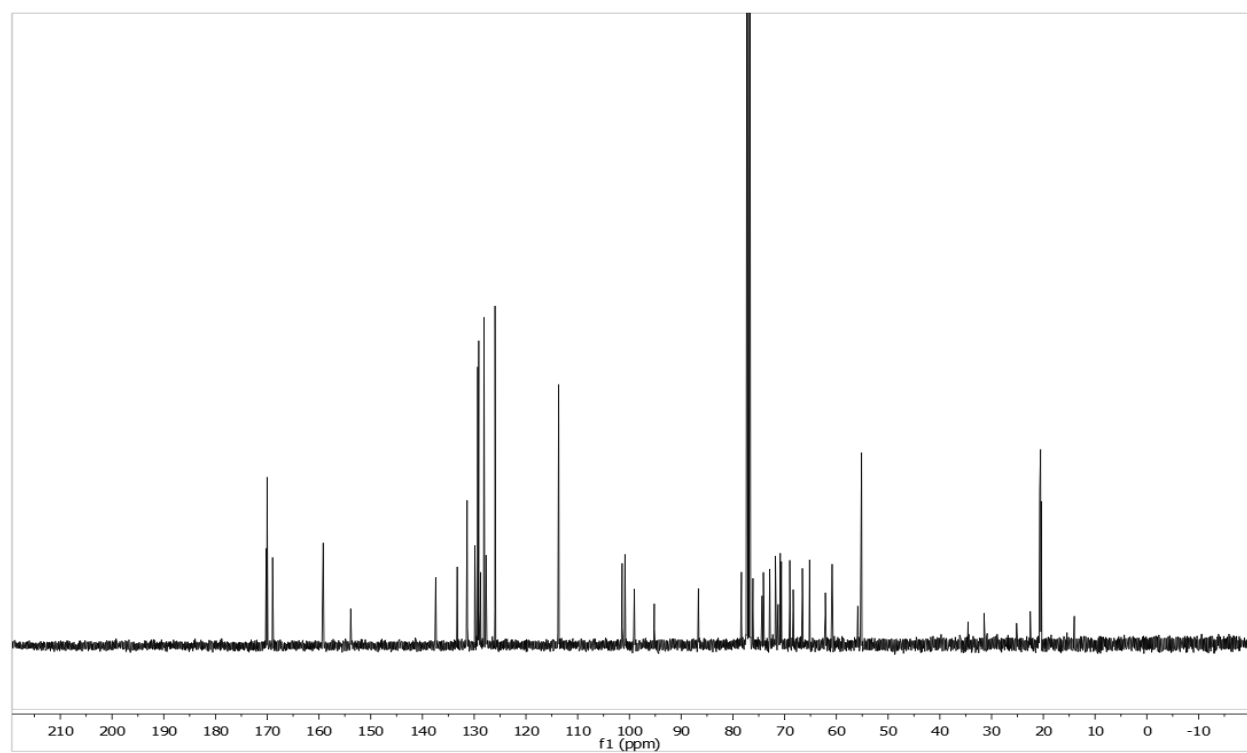

$^1\text{H}$  NMR of Compound 15

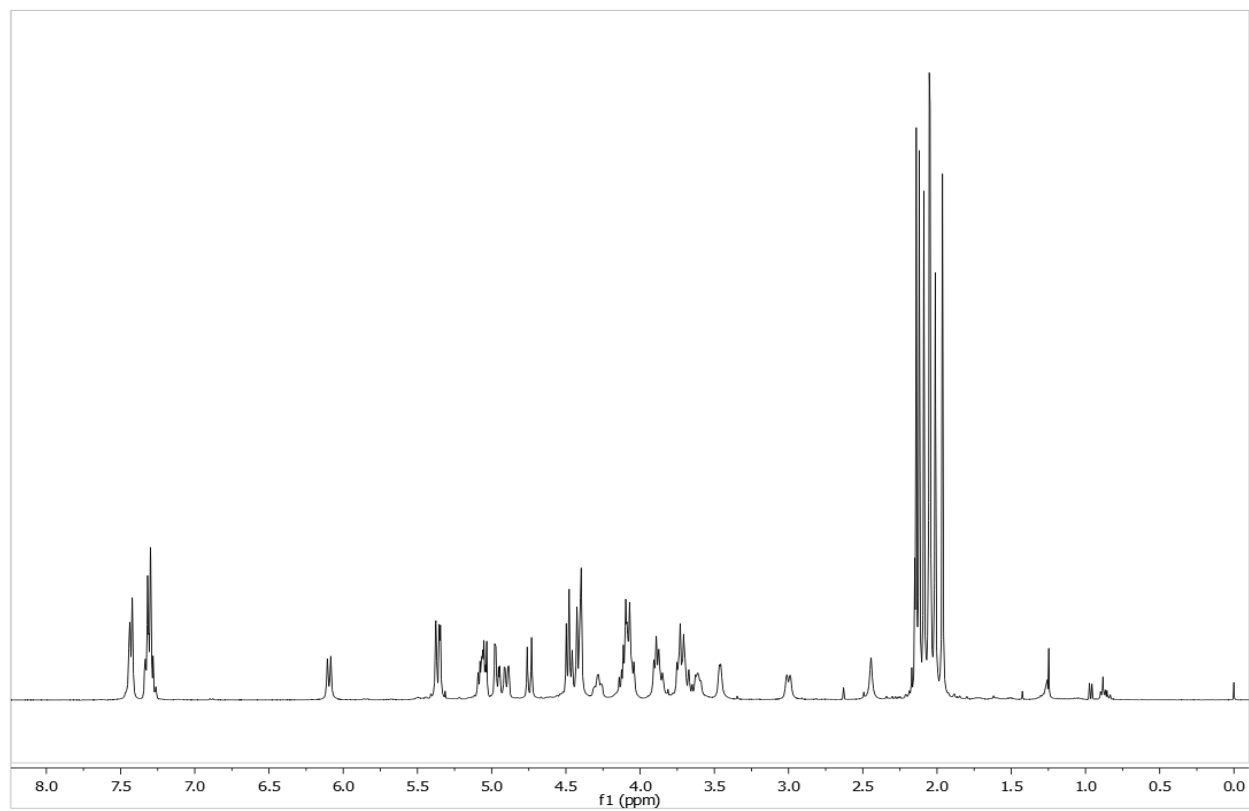

$^{13}\text{C}$  NMR of Compound 15

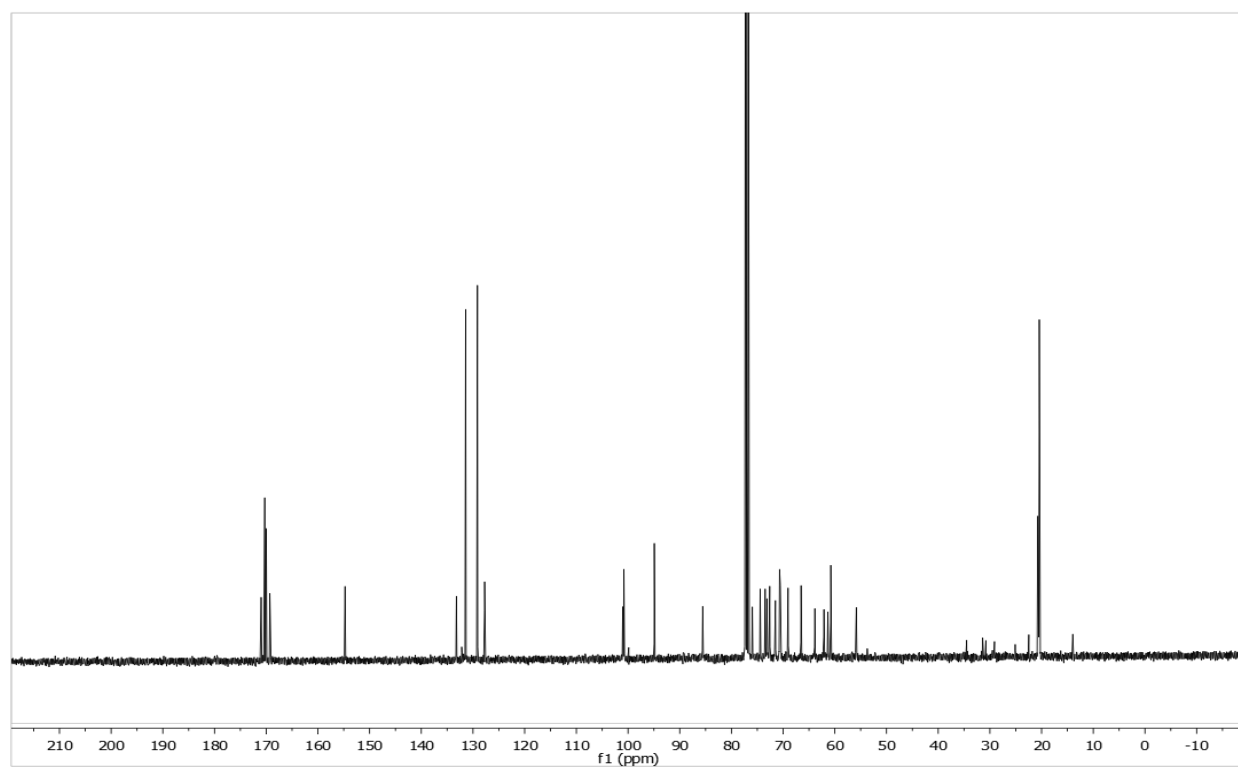

$^1\text{H}$  NMR of Compound 16

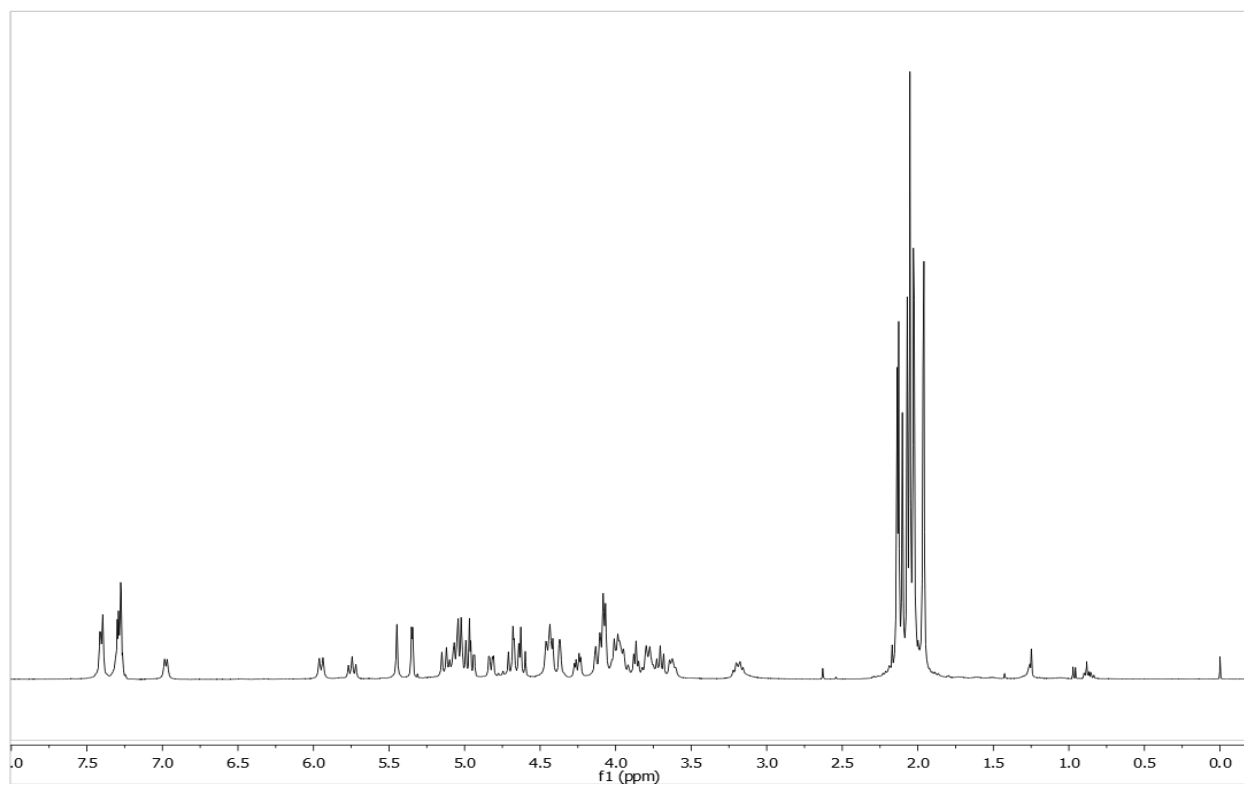

$^{13}\text{C}$  NMR spectrum of Compound 16

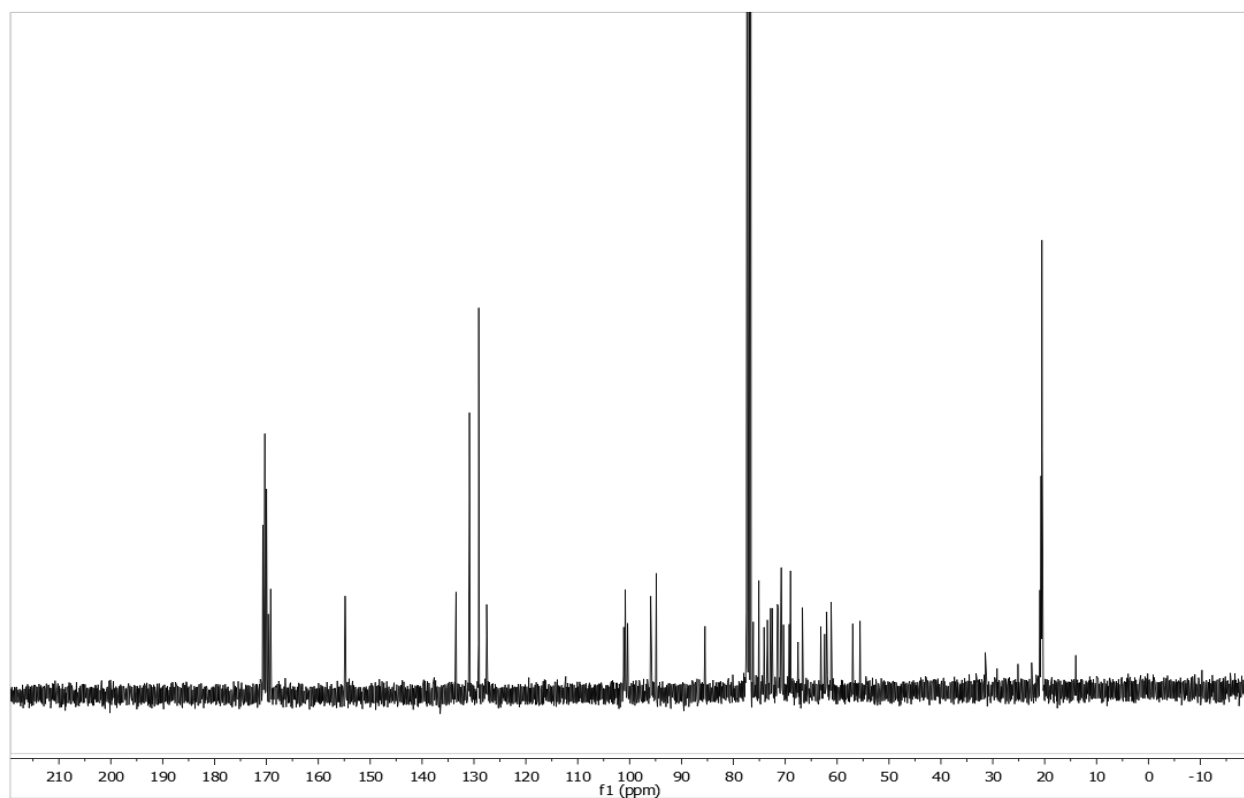

$^1\text{H}$  NMR of Compound 17

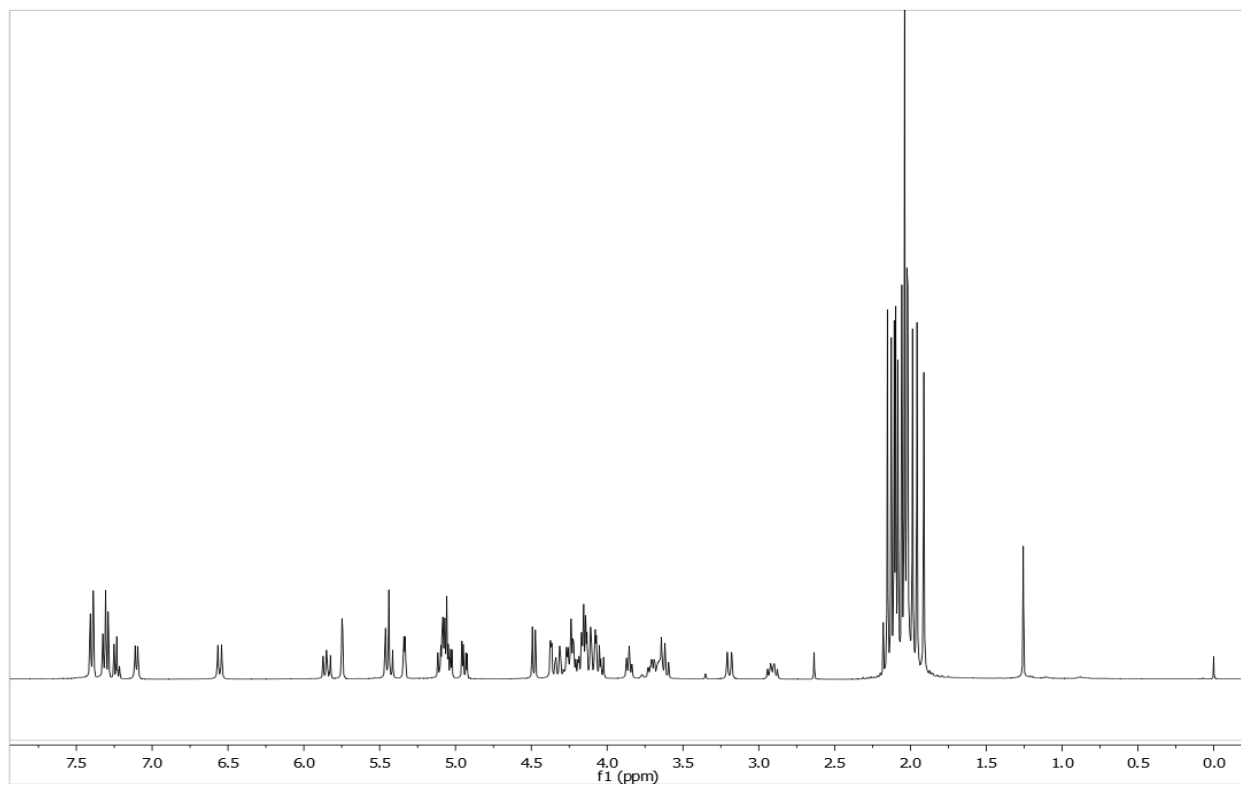

$^{13}\text{C}$  NMR of Compound 17

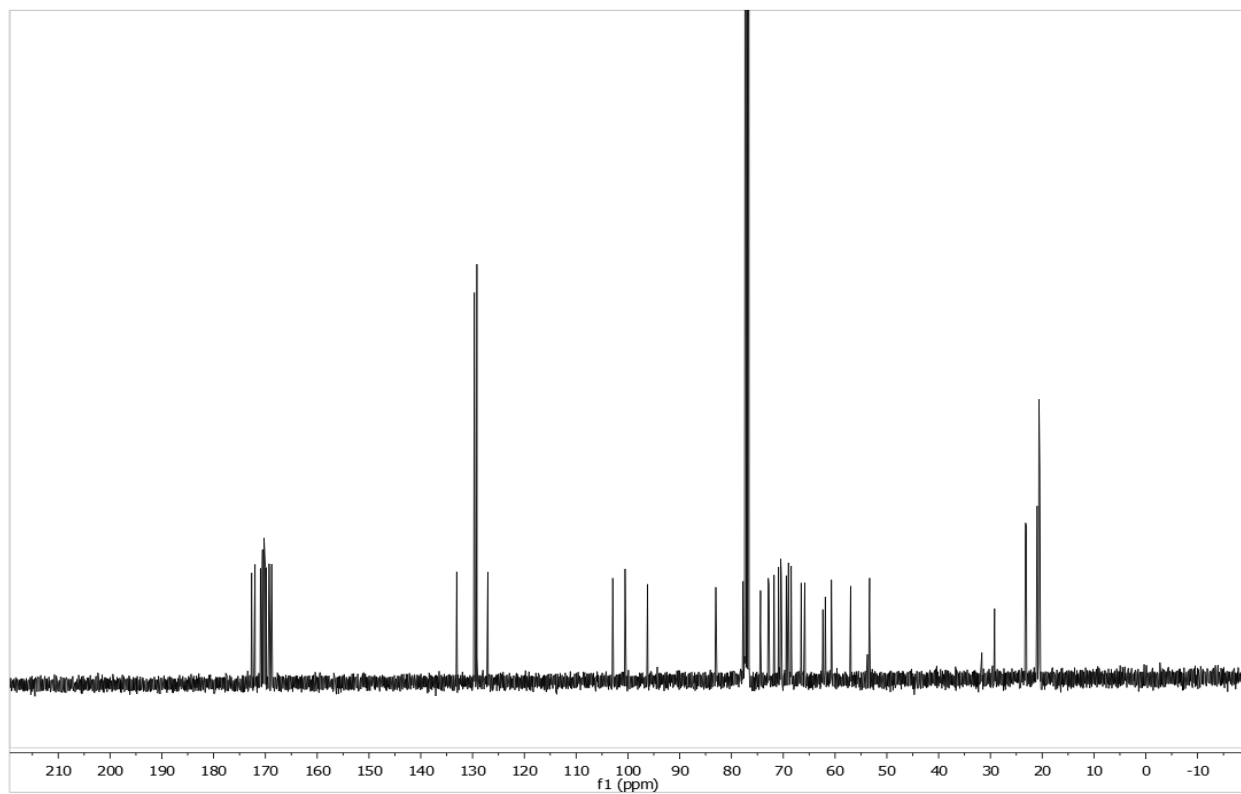



$^1\text{H}$  NMR of Compound 18

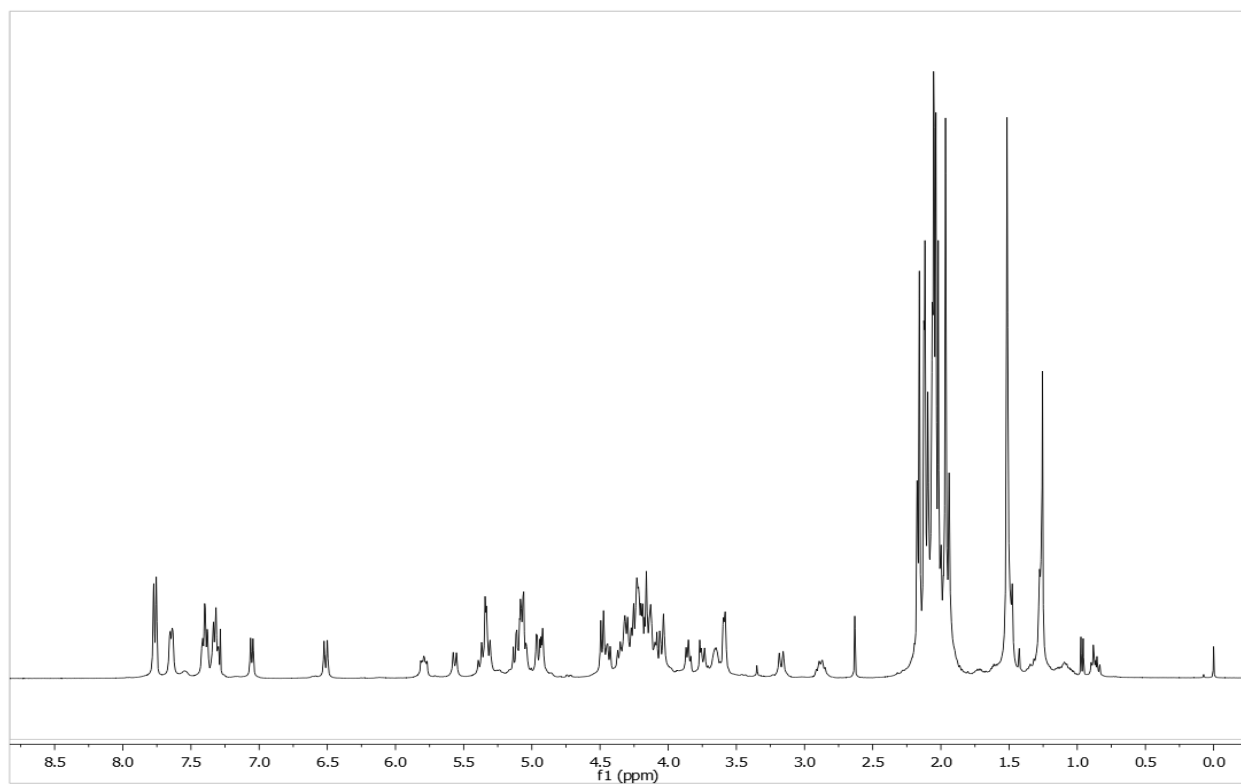

$^{13}\text{C}$  NMR of Compound 18

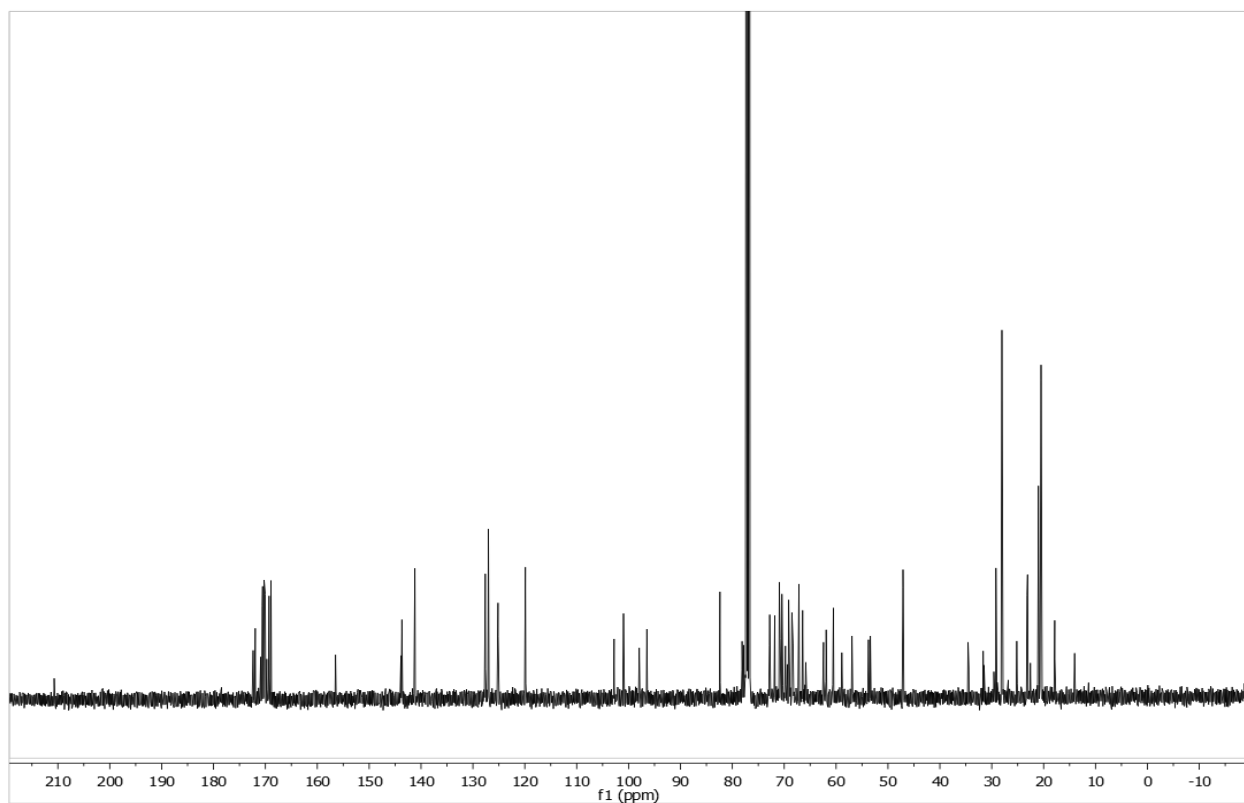

$^1\text{H}$  NMR of Compound 19 (M201)

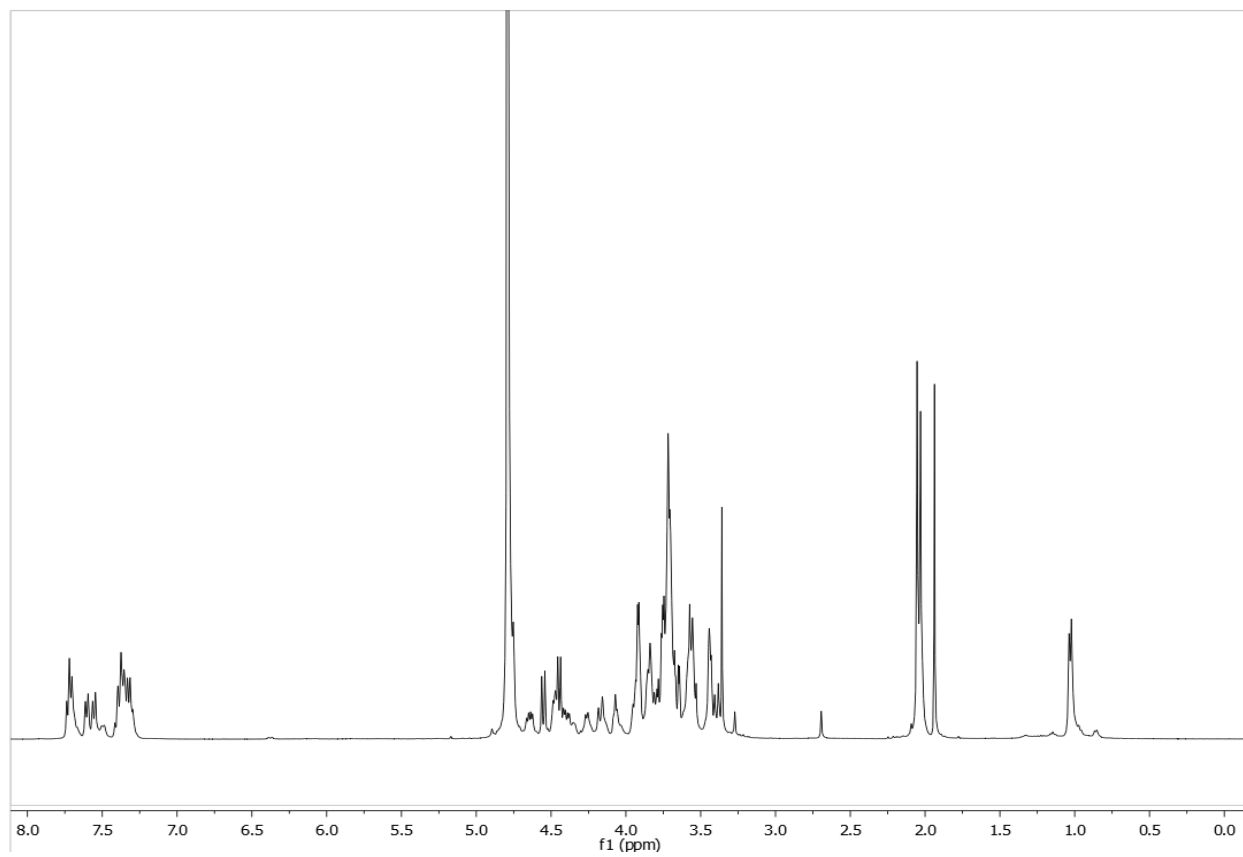

$^{13}\text{C}$  NMR of Compound 19 (M201)

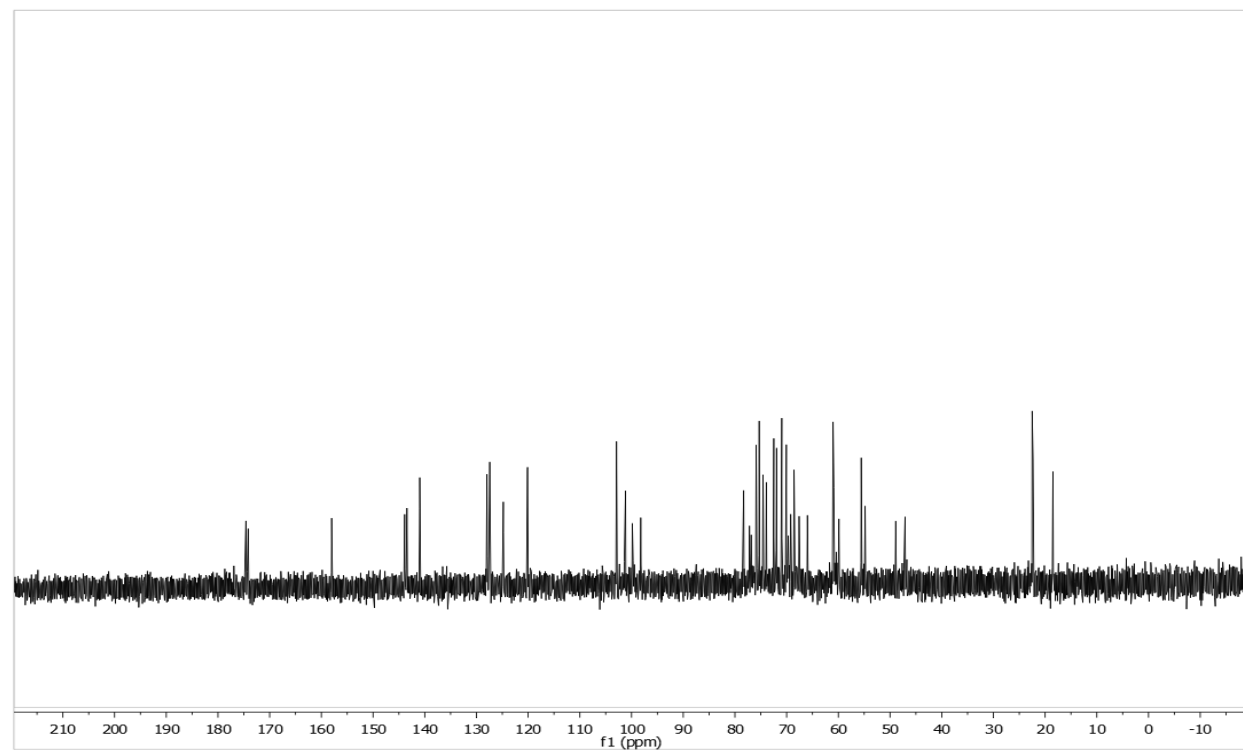

$^1\text{H}$  NMR of M101

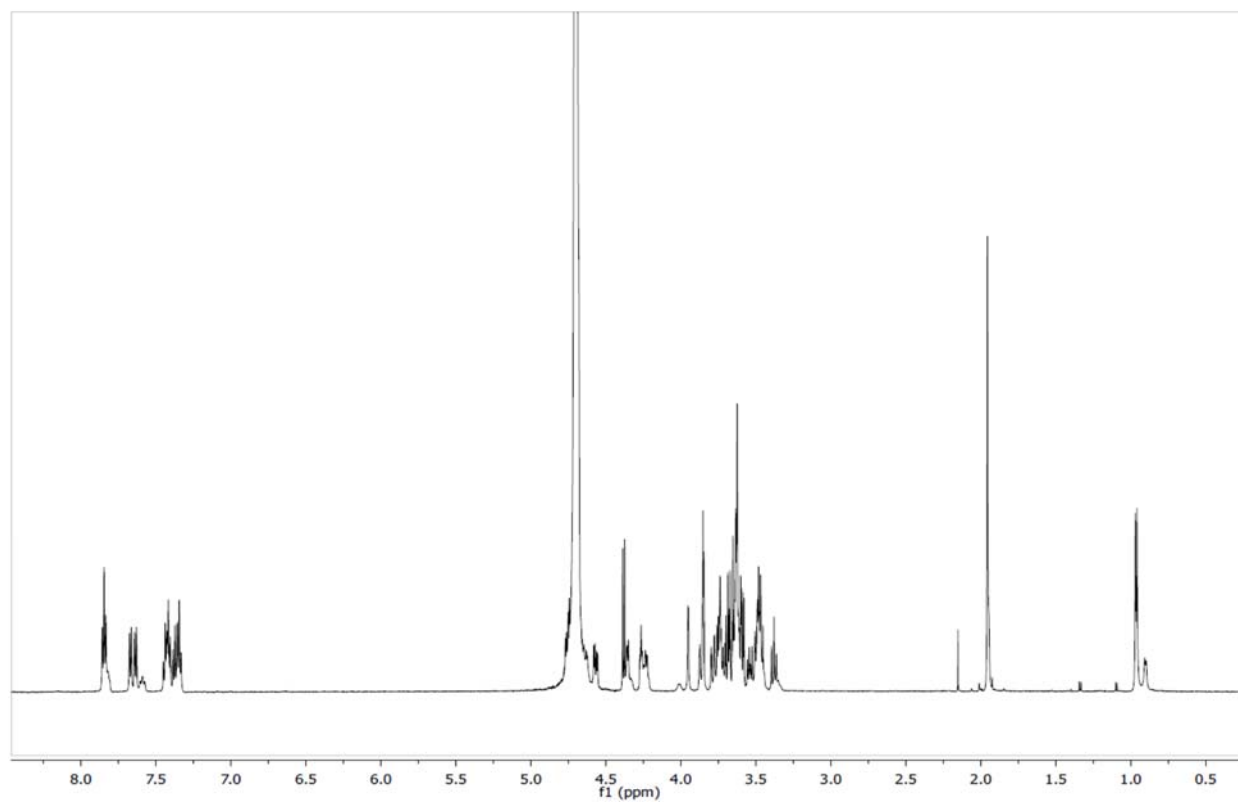

$^1\text{H}$  NMR of M102

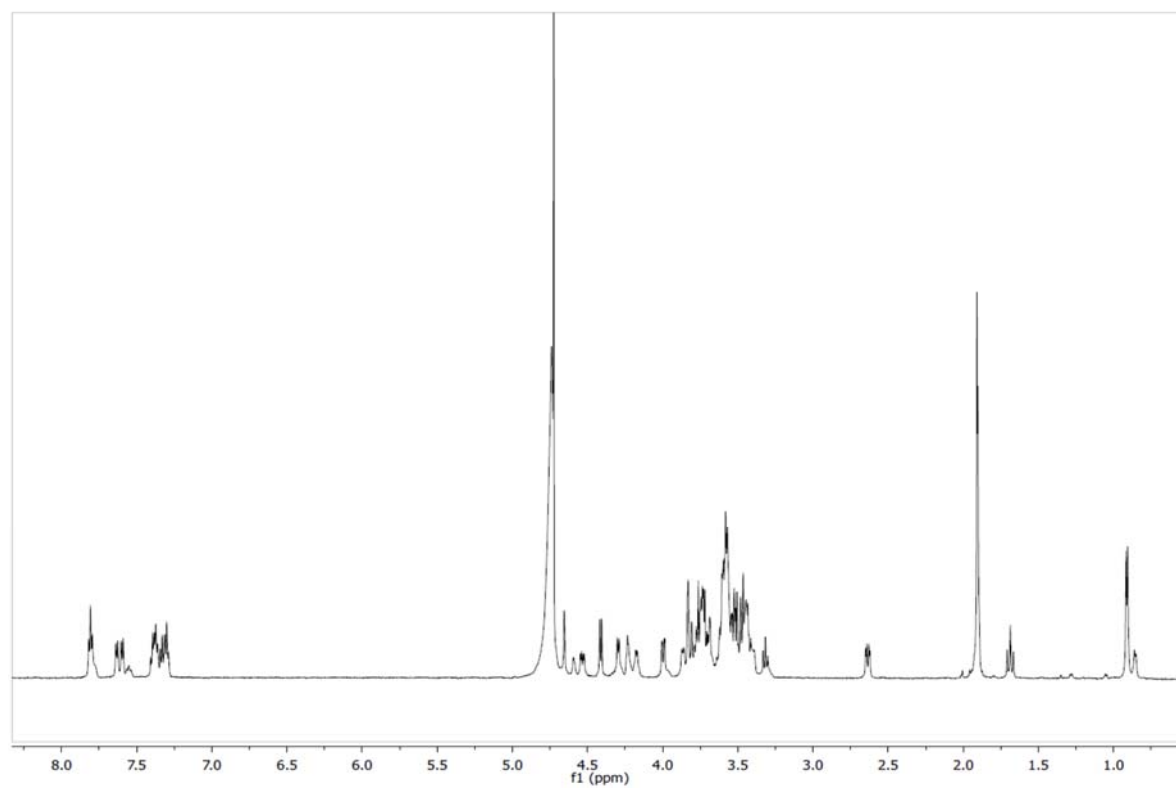

$^1\text{H}$  NMR of M103

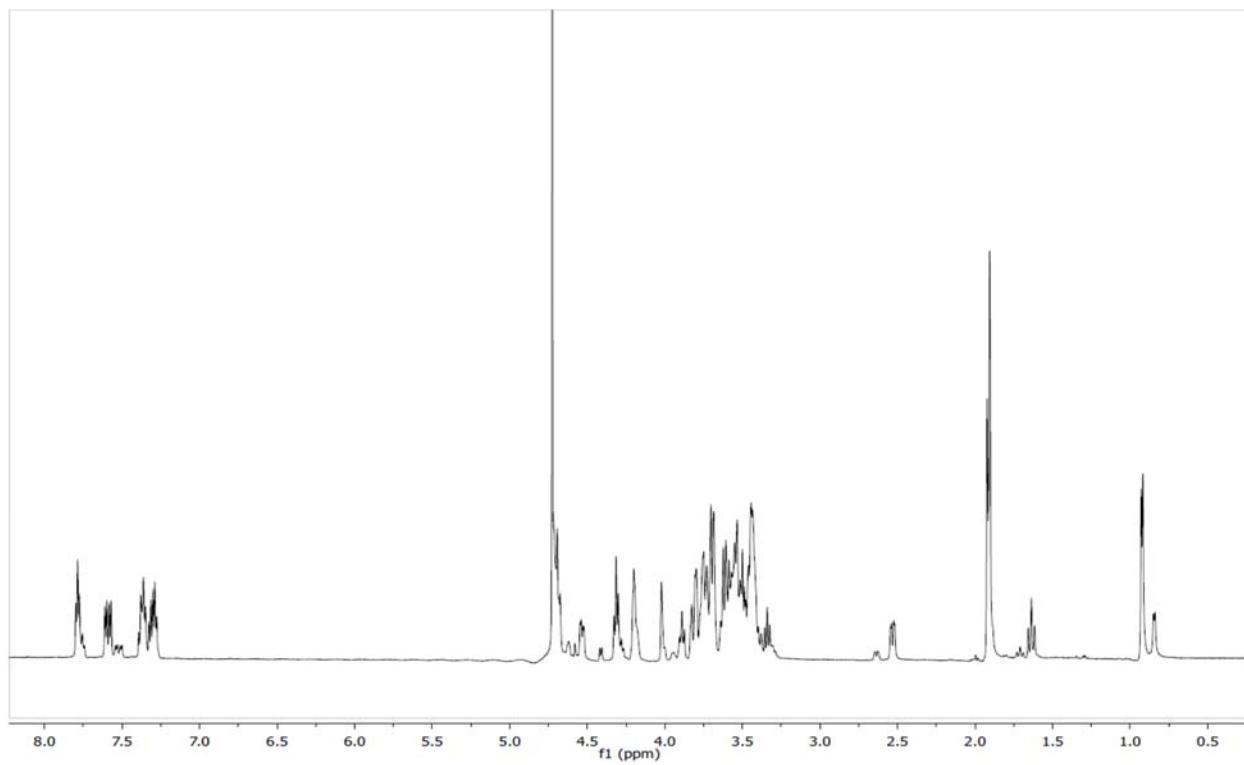

$^1\text{H}$  NMR of M104

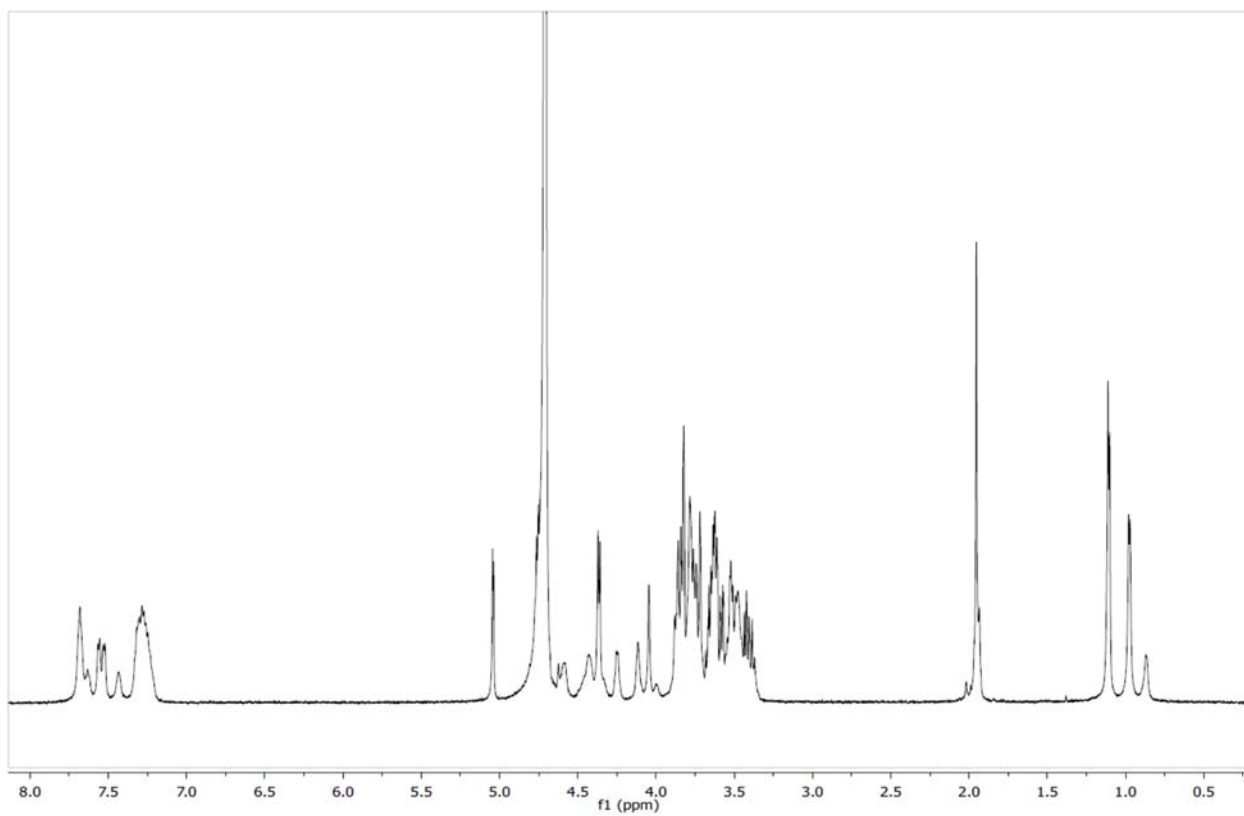

$^1\text{H}$  NMR of M105

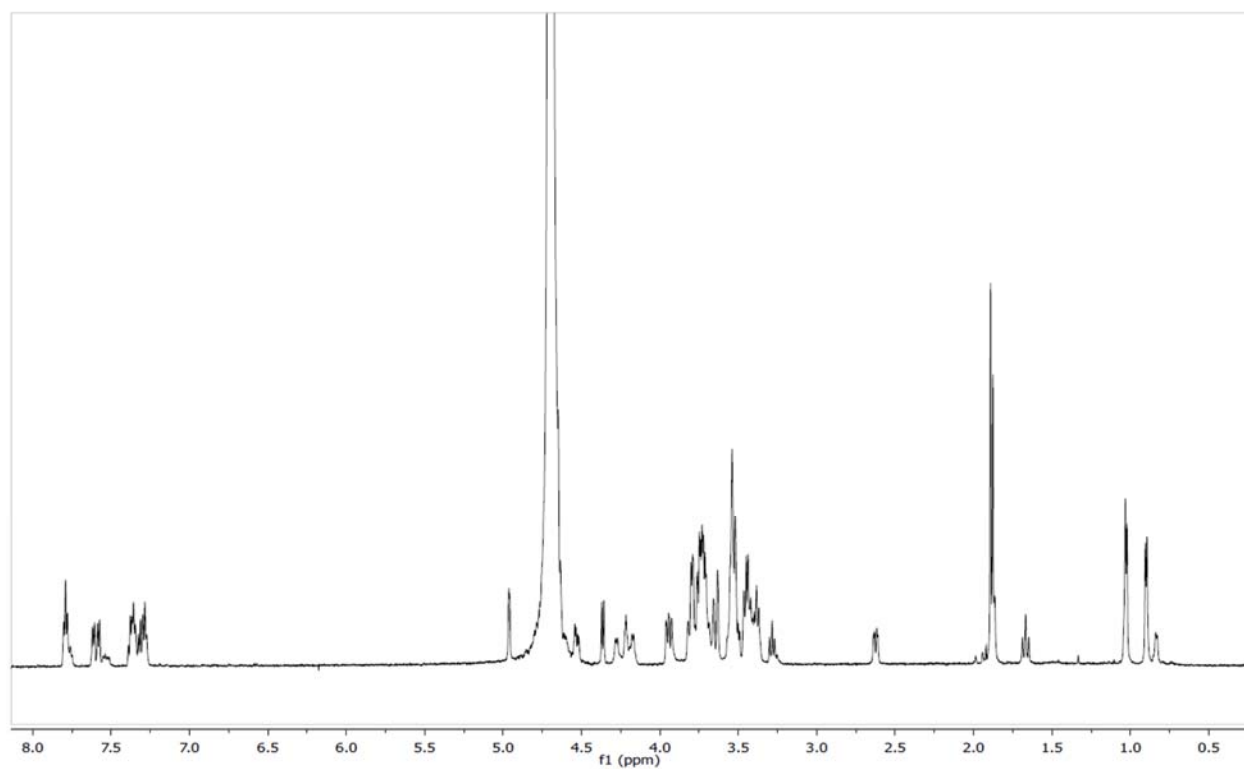

$^1\text{H}$  NMR of M106

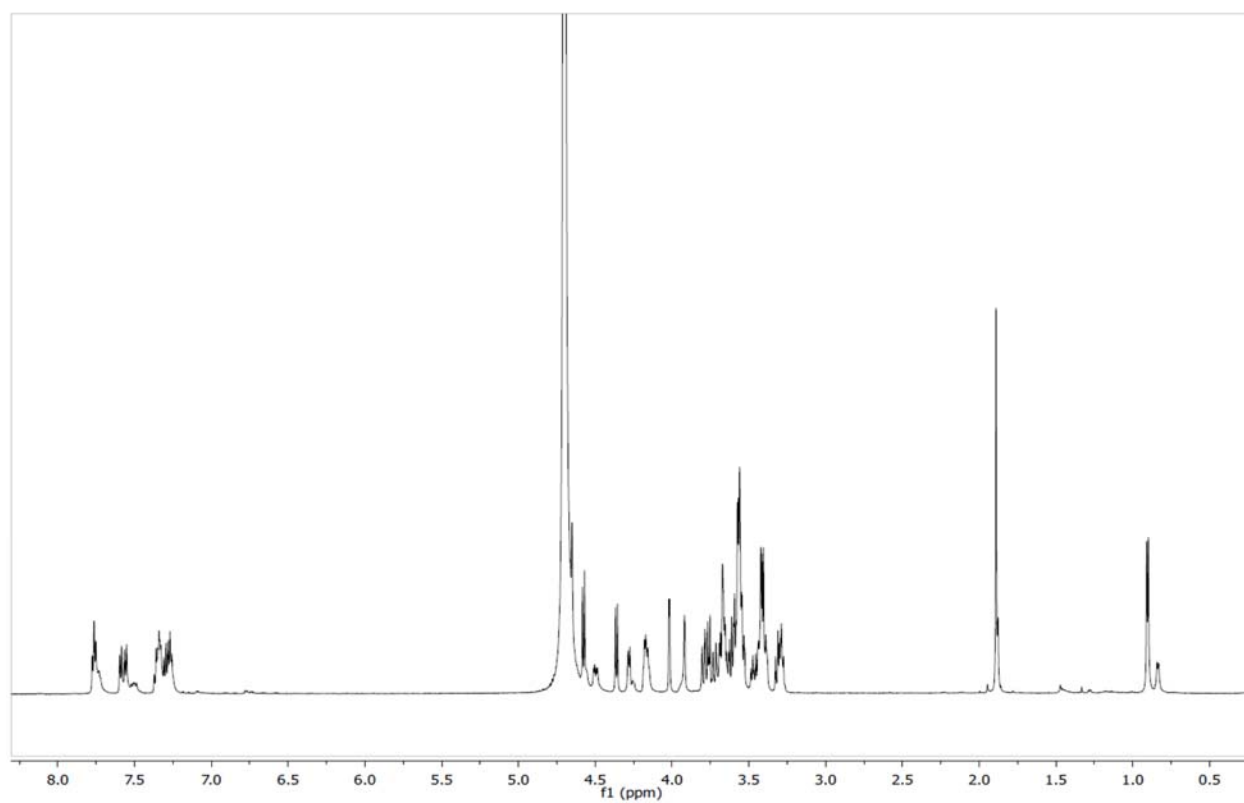

$^1\text{H}$  NMR of M102G

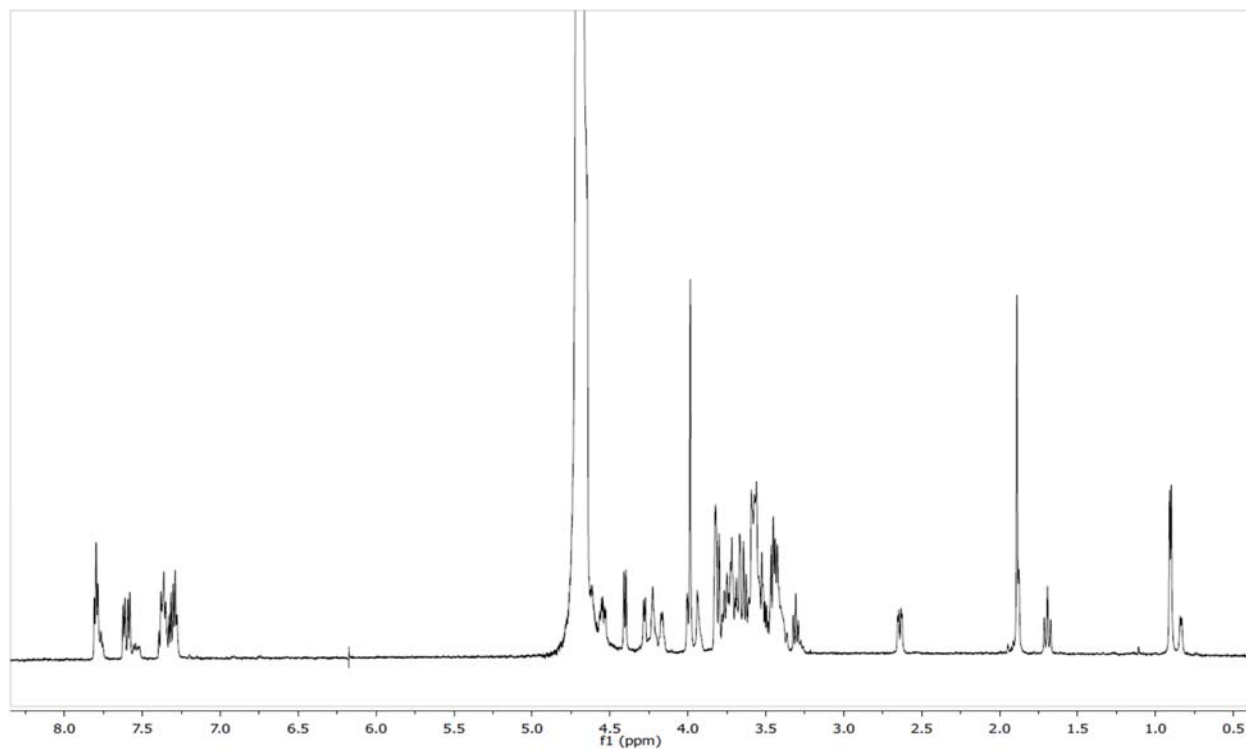

$^1\text{H}$  NMR of M103G

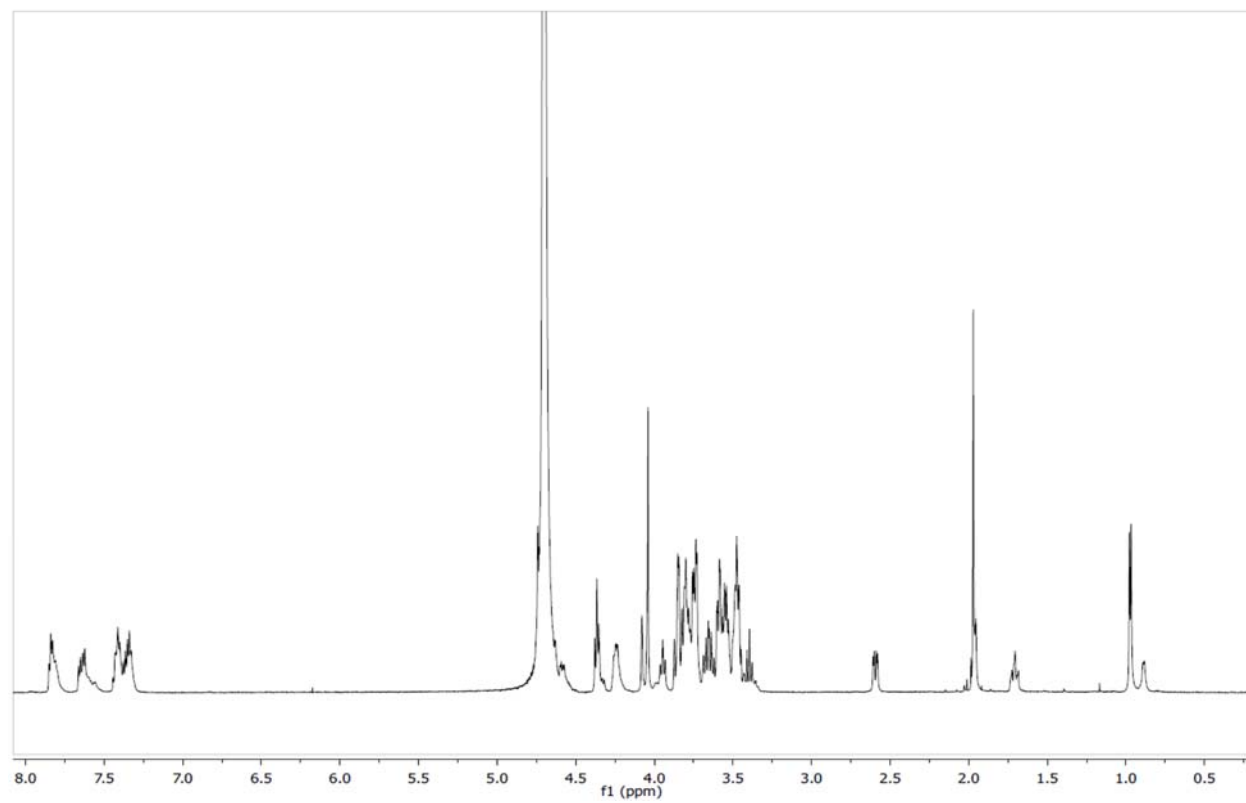

$^1\text{H}$  NMR of M000

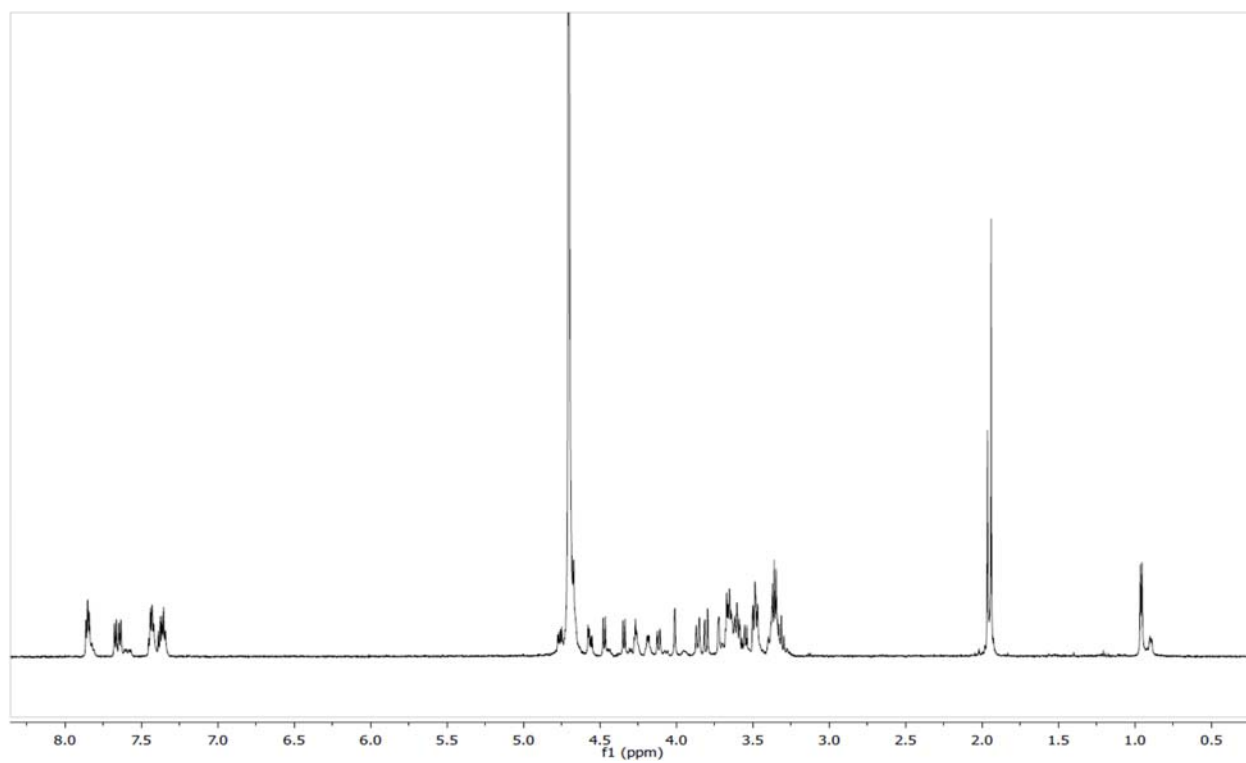

$^1\text{H}$  NMR of M202

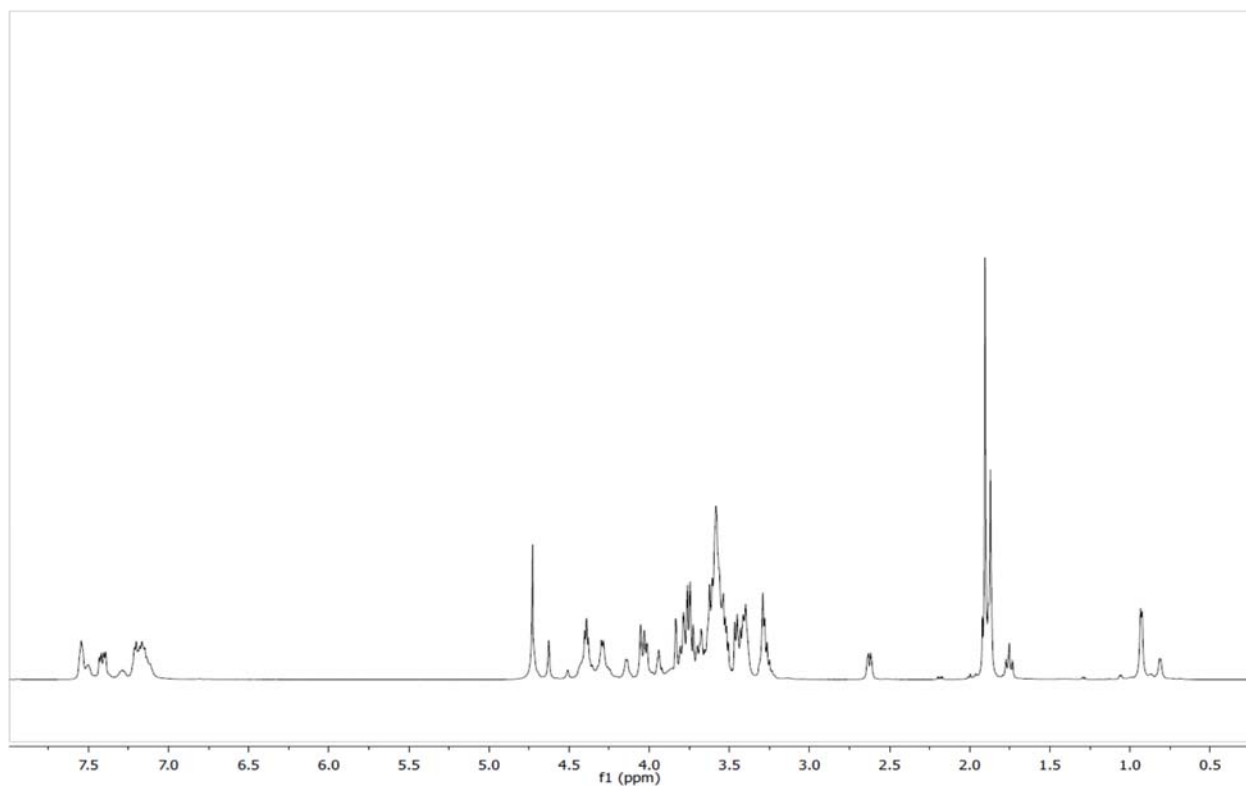

$^1\text{H}$  NMR of M203

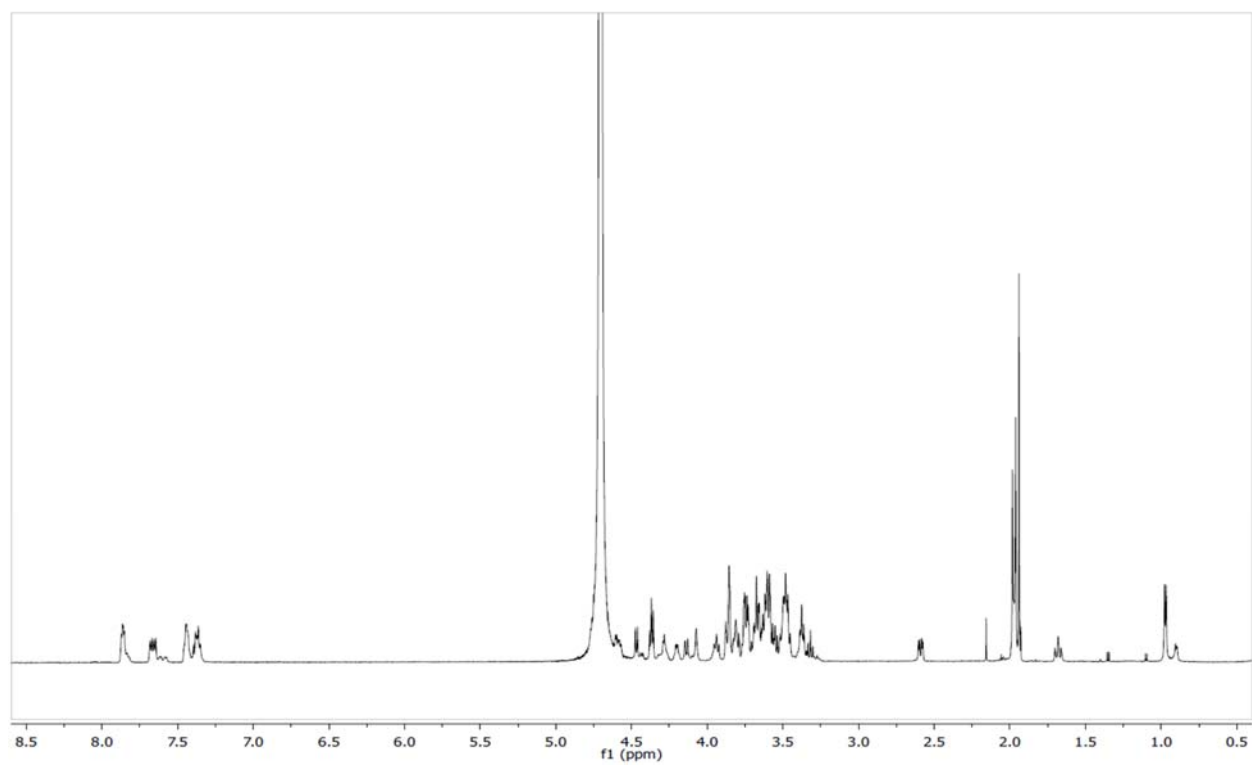

$^1\text{H}$  NMR of M204

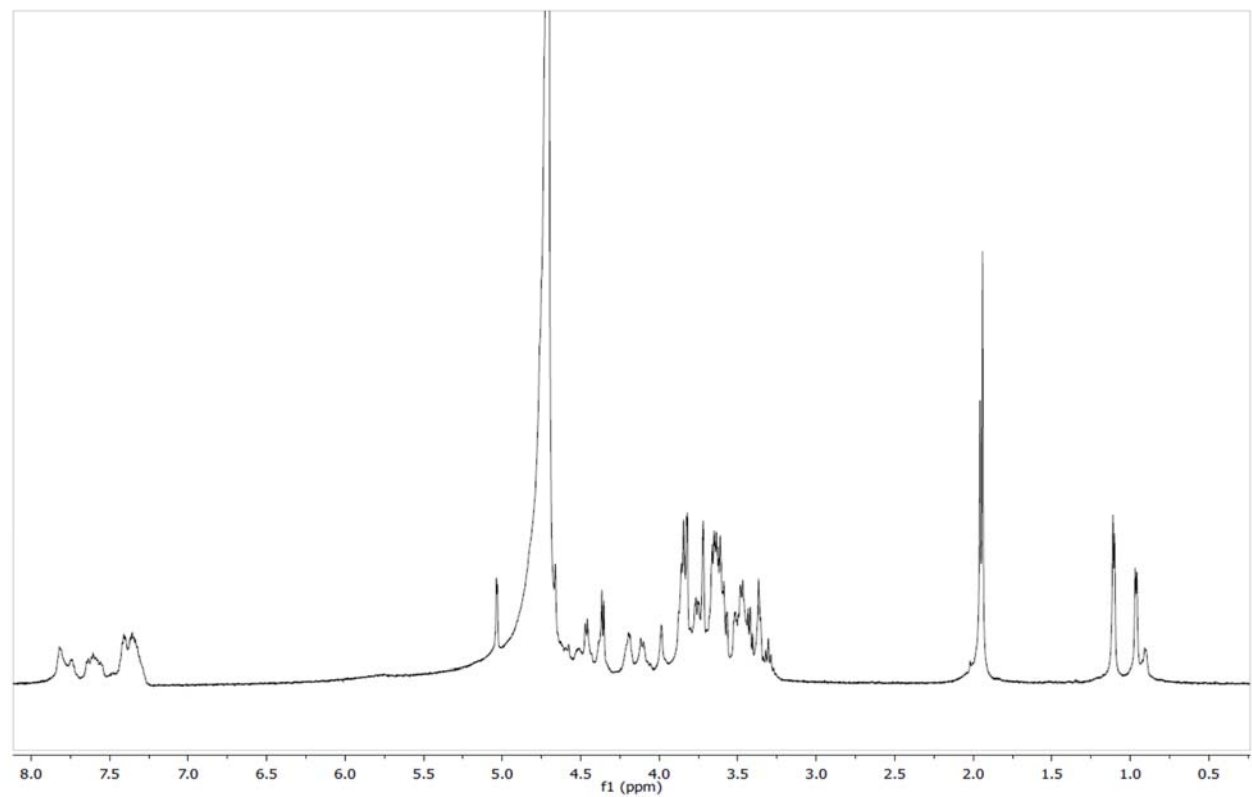



$^1\text{H}$  NMR of M205

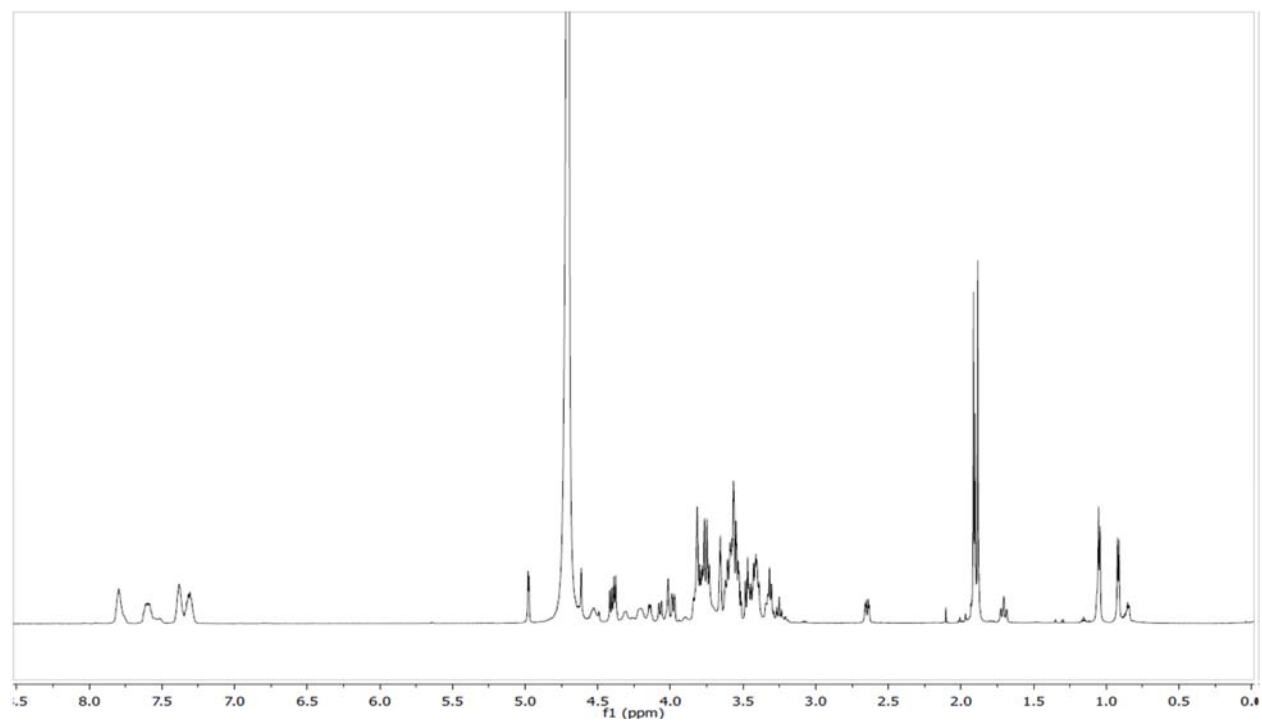

$^1\text{H}$  NMR of M010

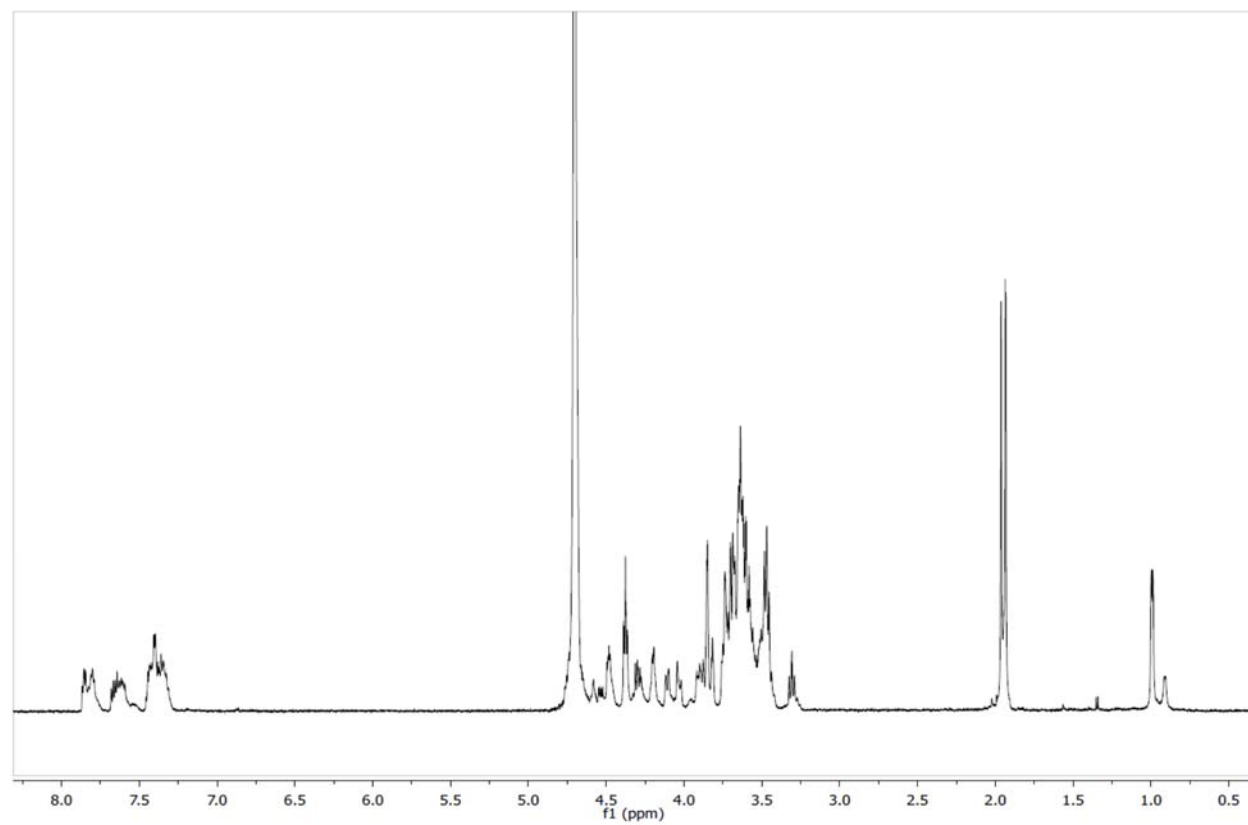

$^1\text{H}$  NMR of M212

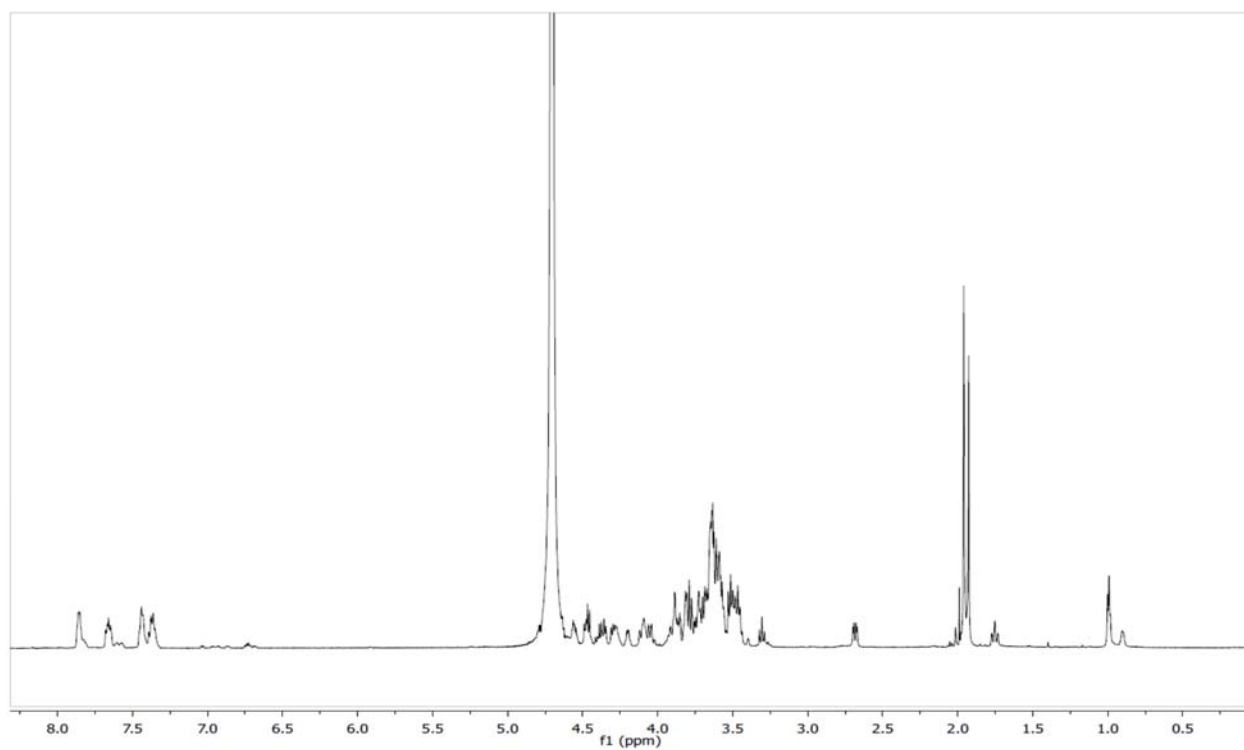

$^1\text{H}$  NMR of M213

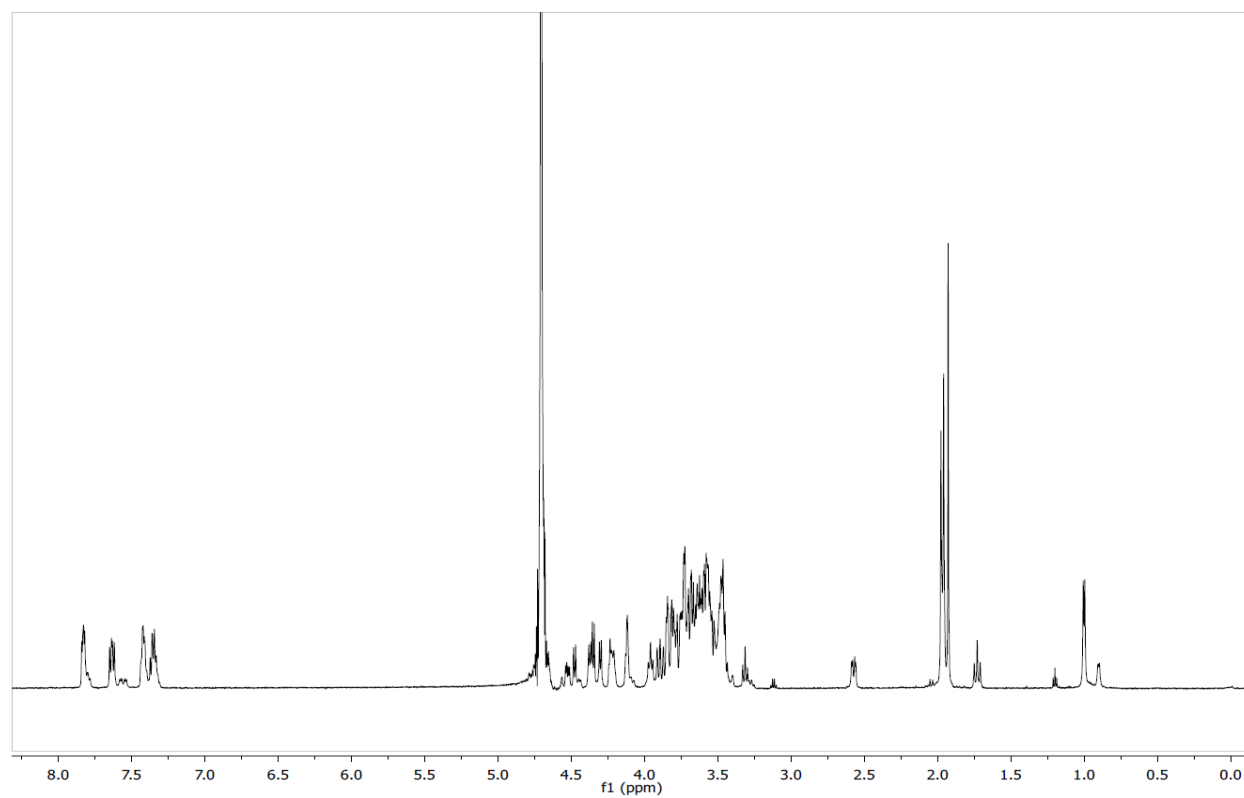

$^1\text{H}$  NMR of M214

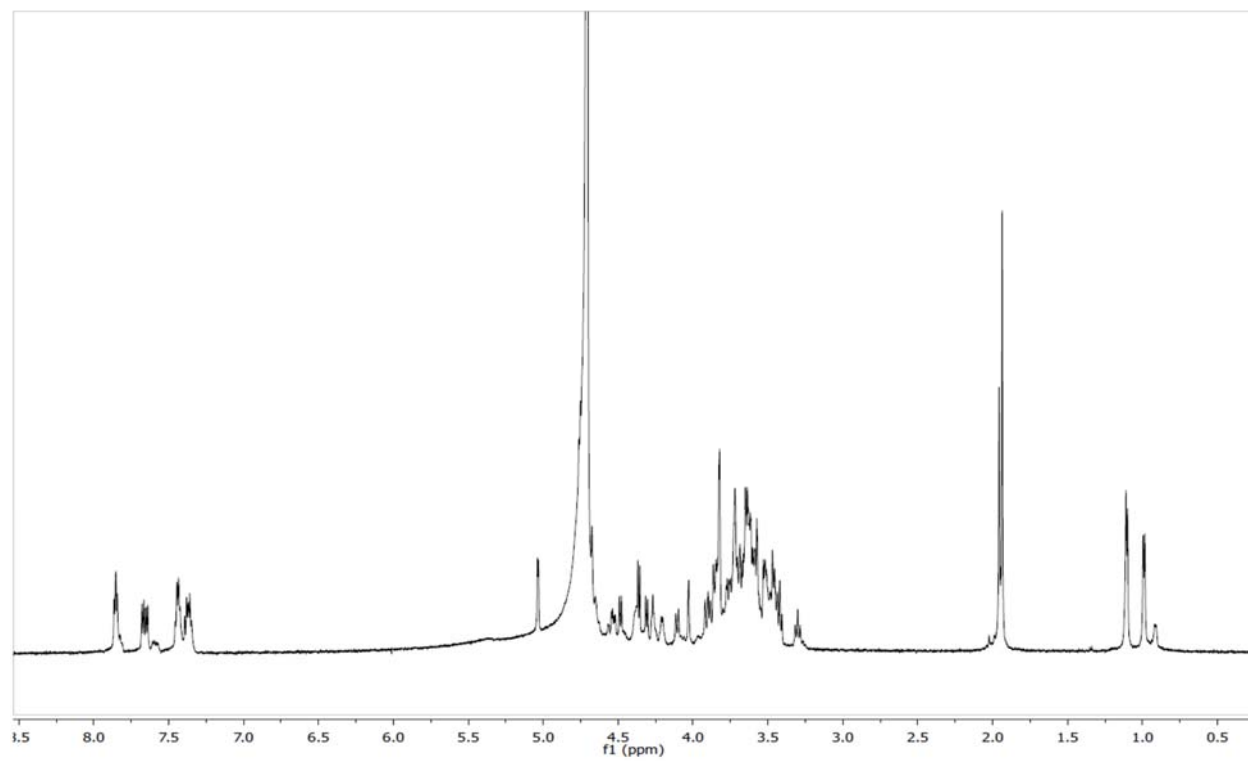

$^1\text{H}$  NMR of M215

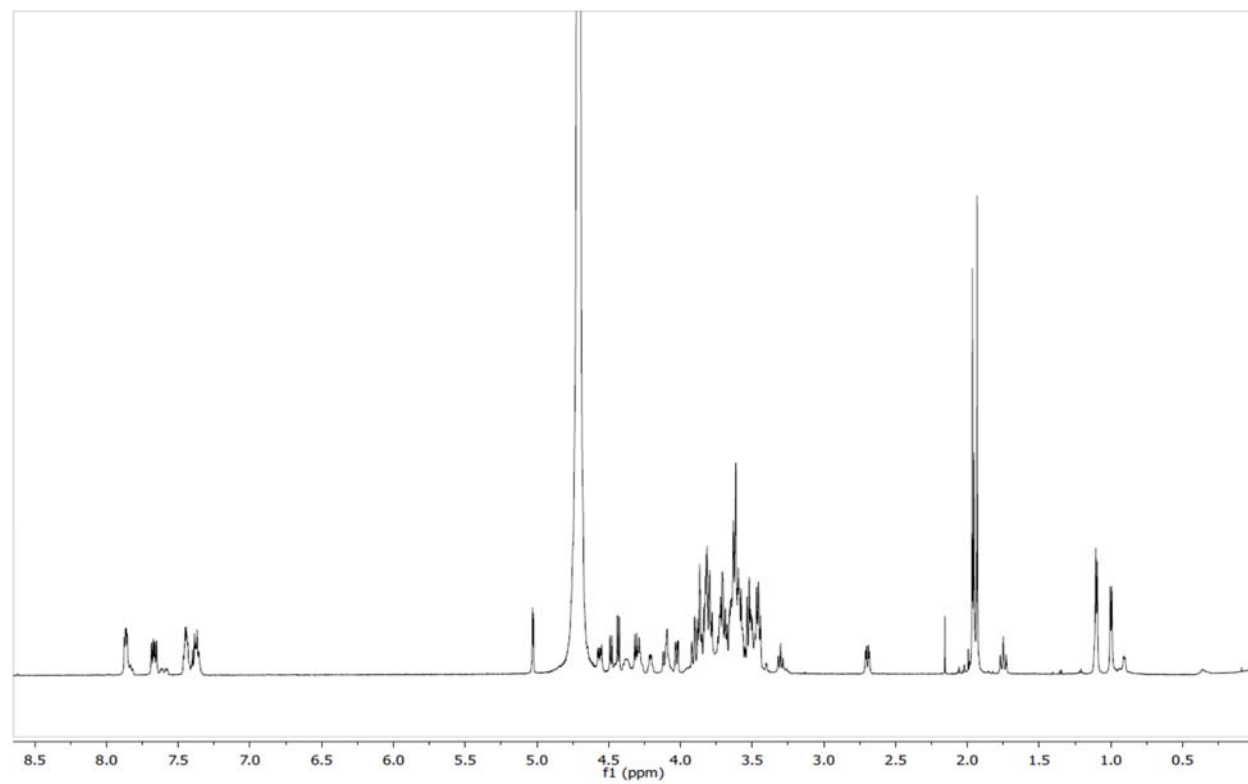

$^1\text{H}$  NMR of M020

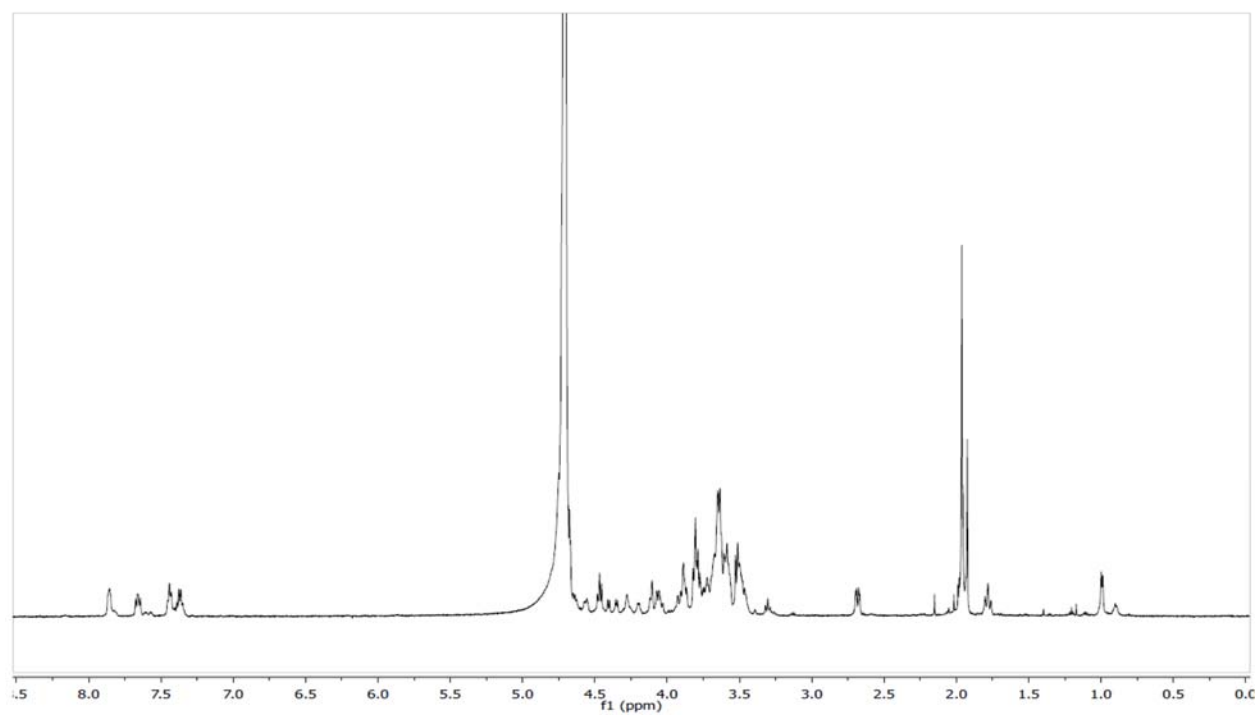

$^1\text{H}$  NMR of M223

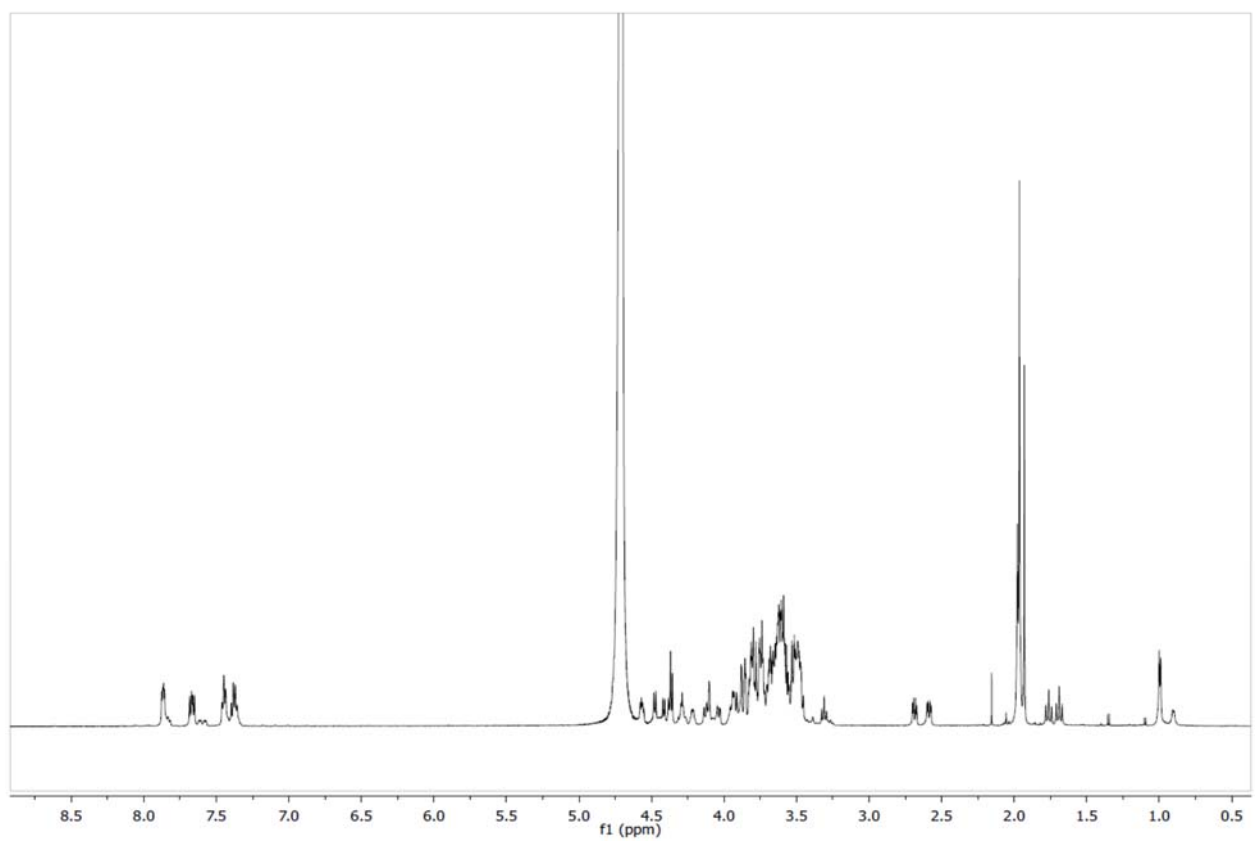

$^1\text{H}$  NMR of M224

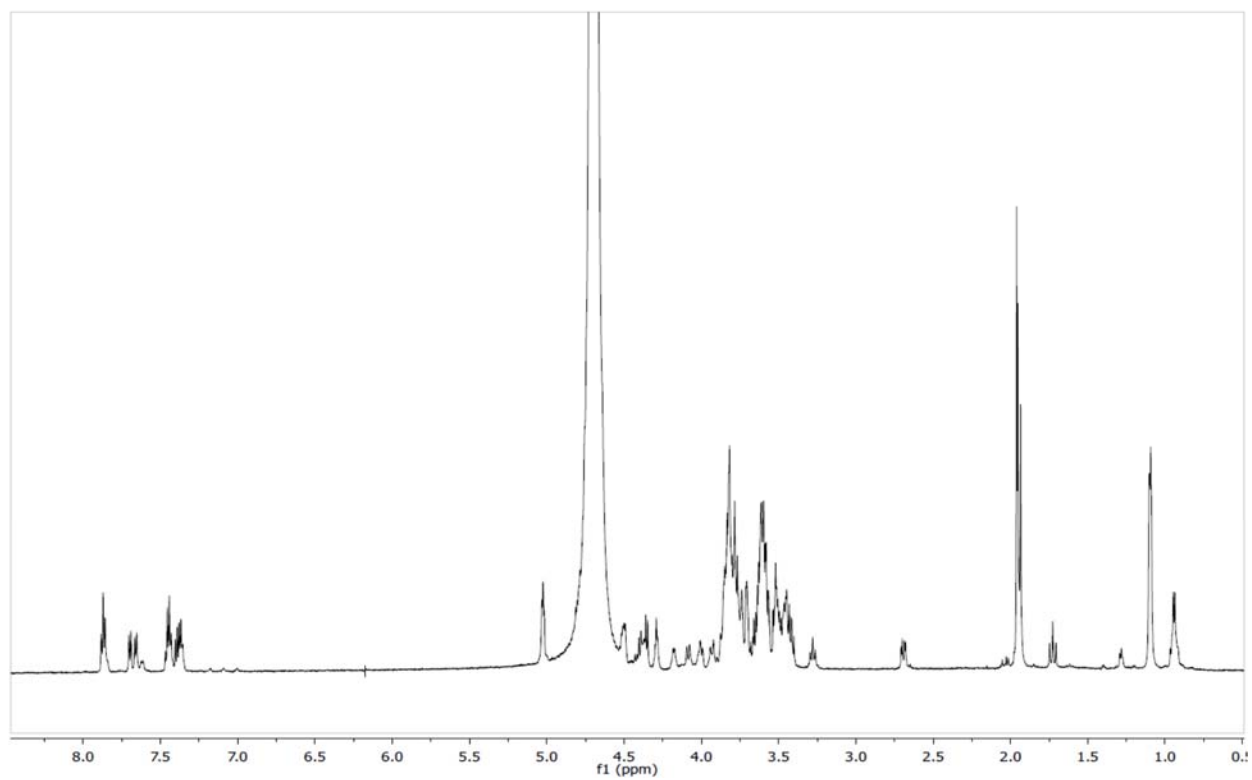

$^1\text{H}$  NMR of M225

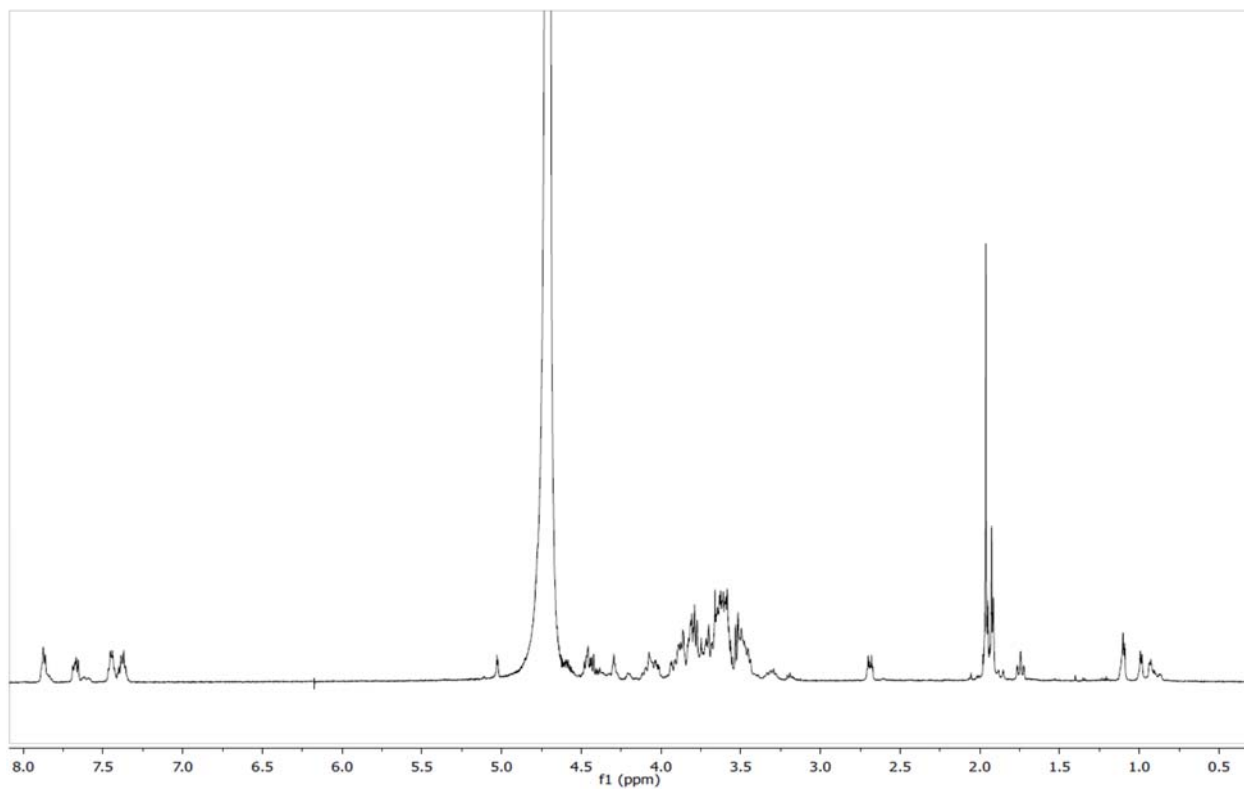

$^1\text{H}$  NMR of M030

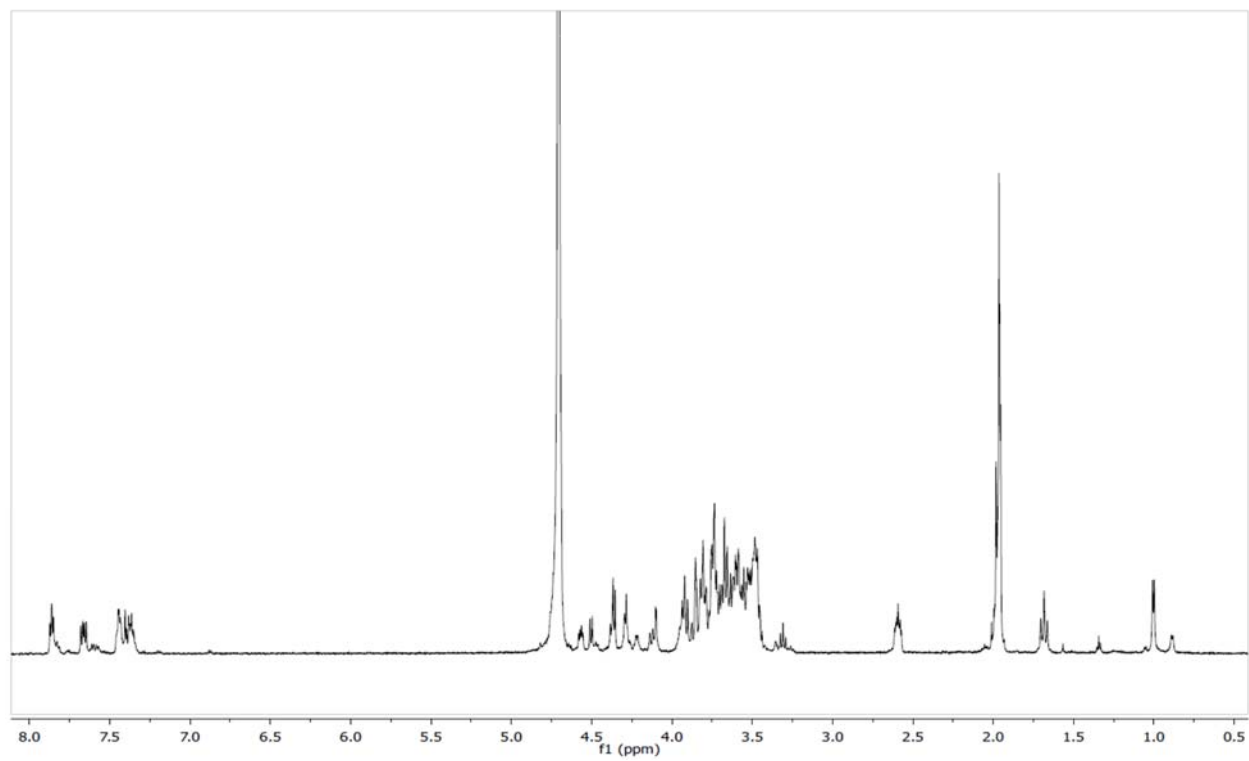

$^1\text{H}$  NMR of M234

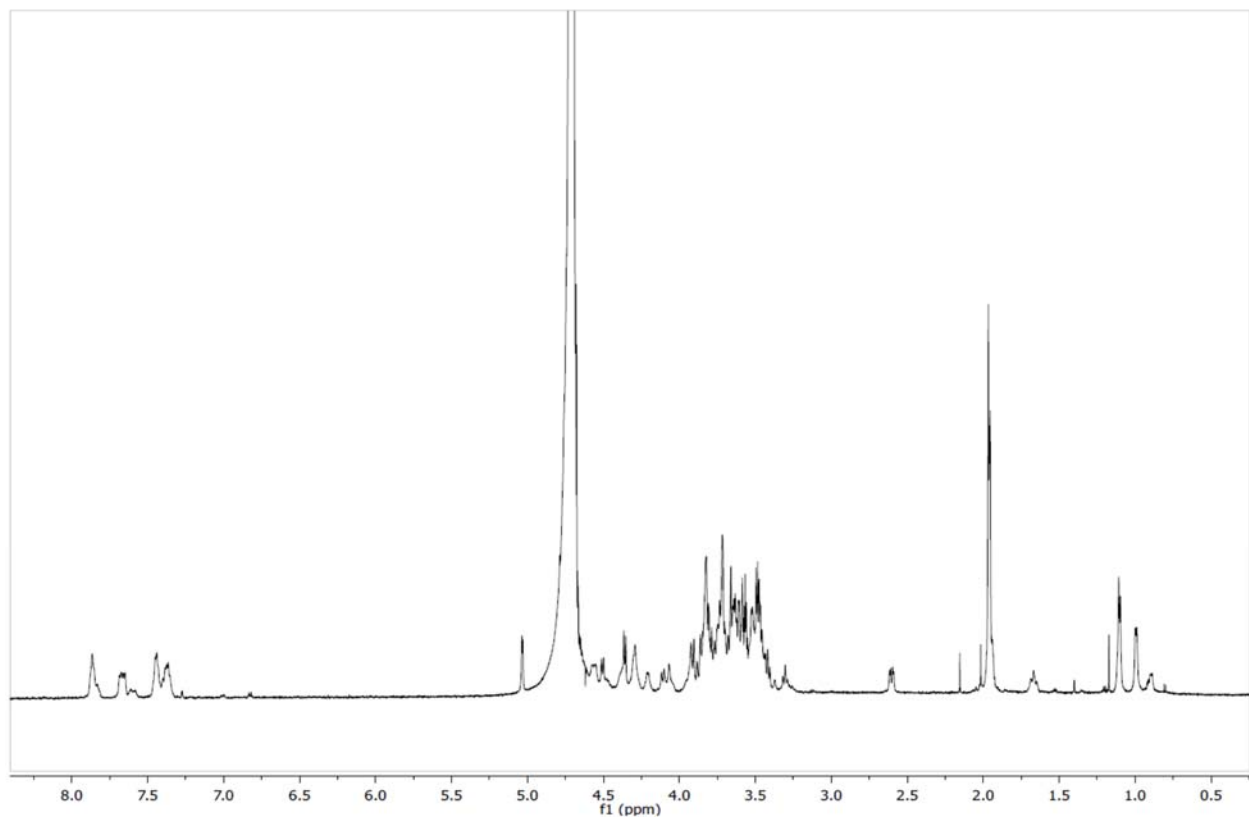

$^1\text{H}$  NMR of M235

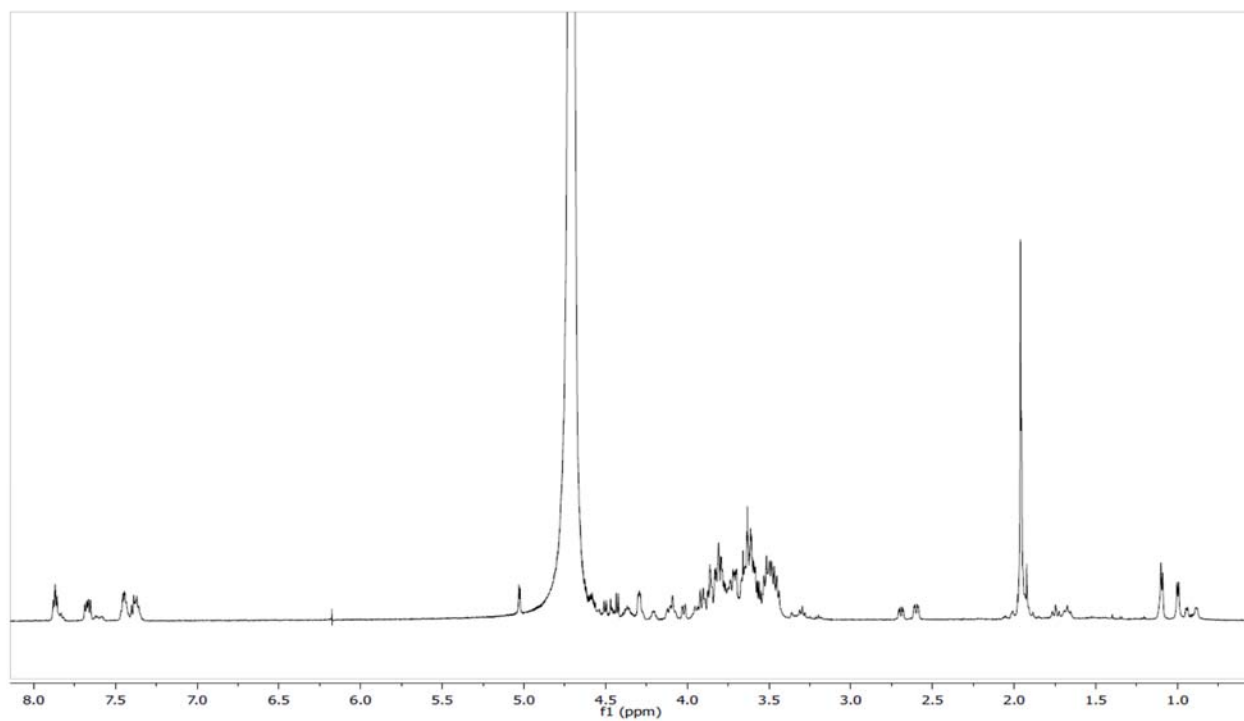

$^1\text{H}$  NMR of M040

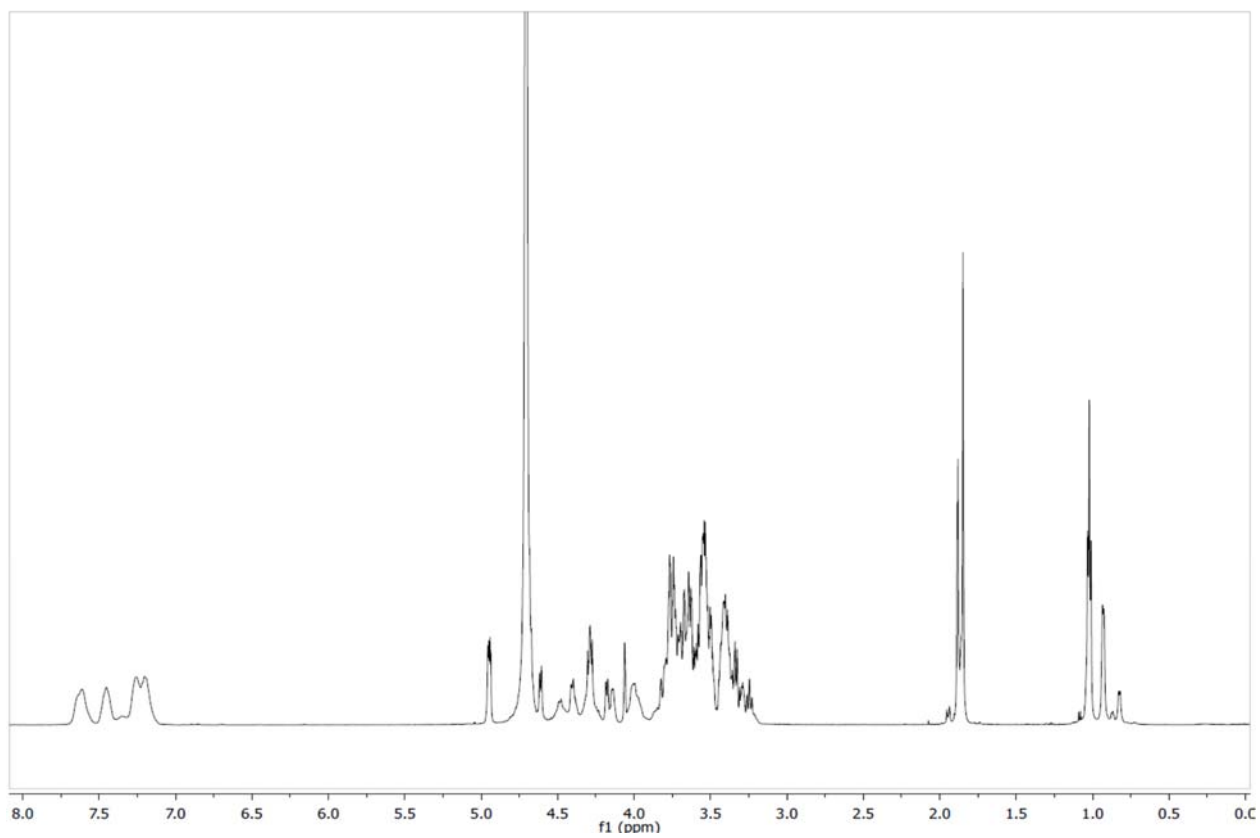

$^1\text{H}$  NMR of M245

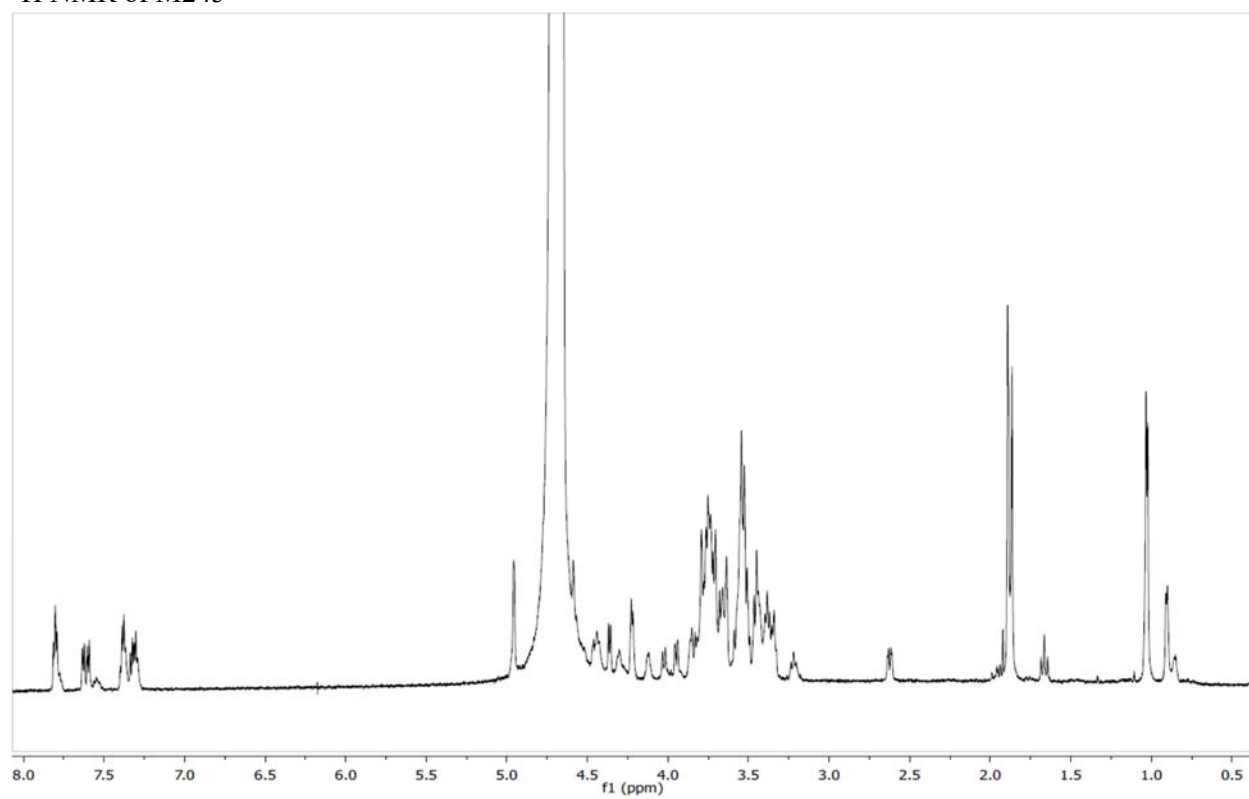

$^1\text{H}$  NMR of M050

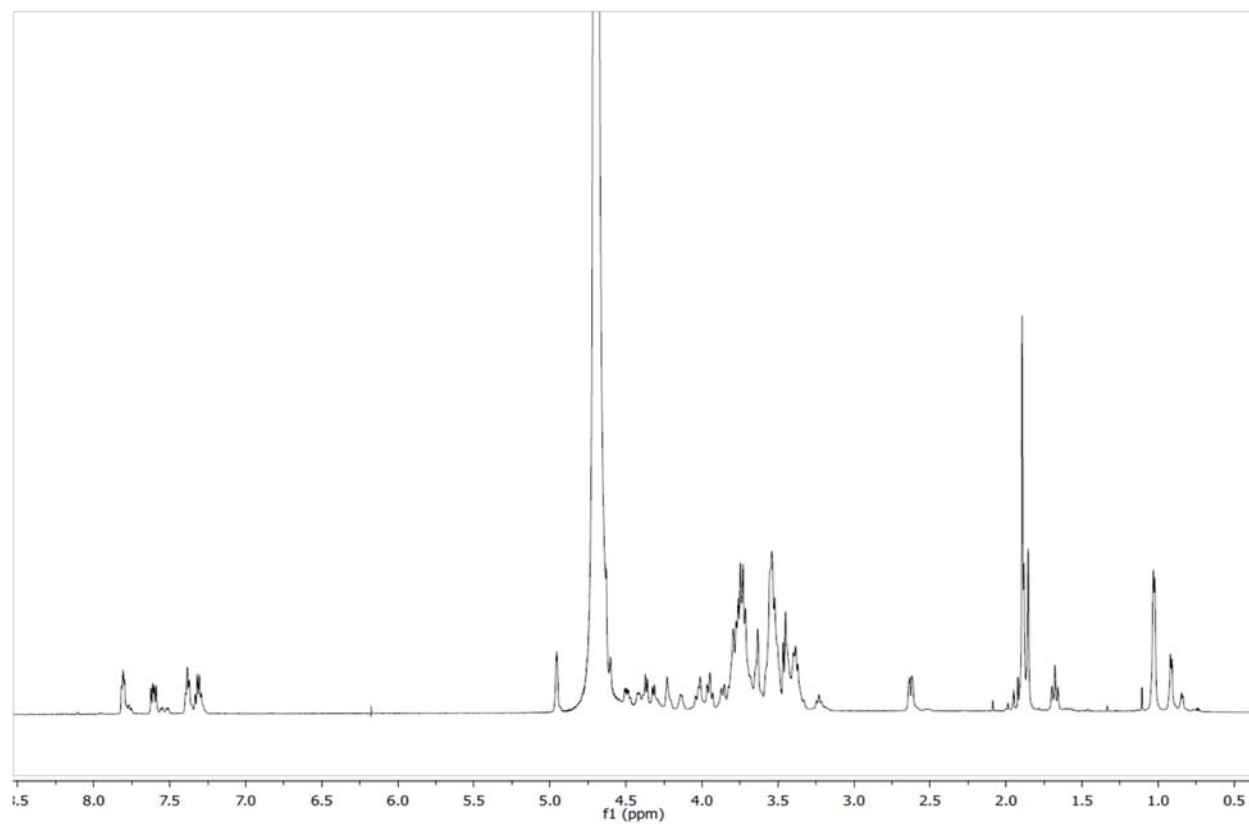



$^1\text{H}$  NMR of M302

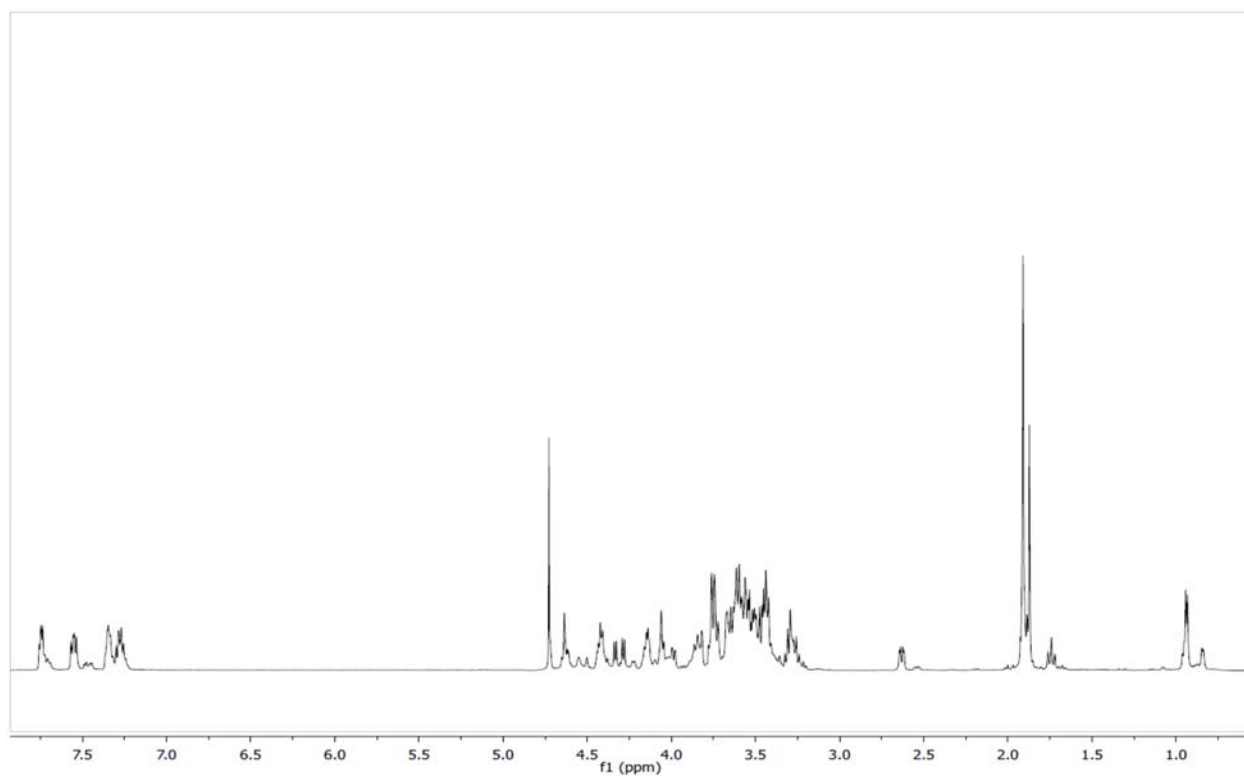

$^1\text{H}$  NMR of M303

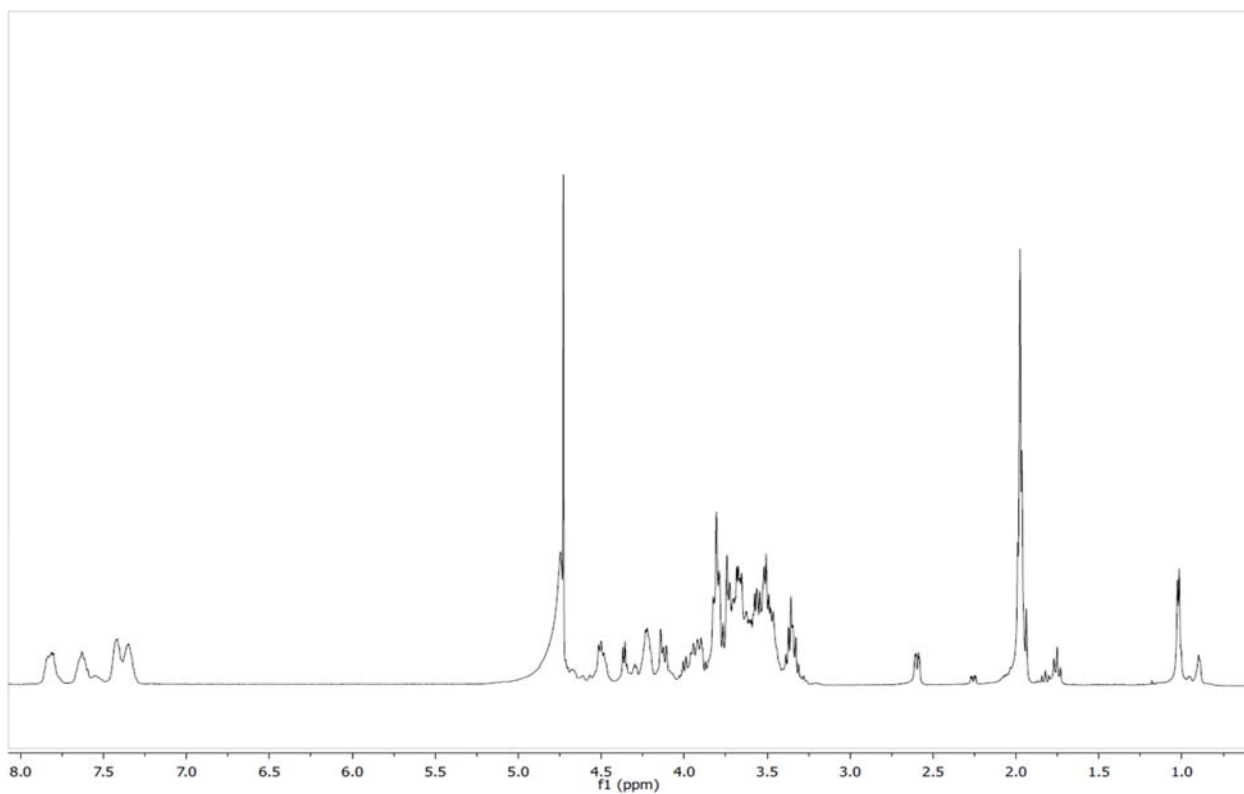

$^1\text{H}$  NMR of M304

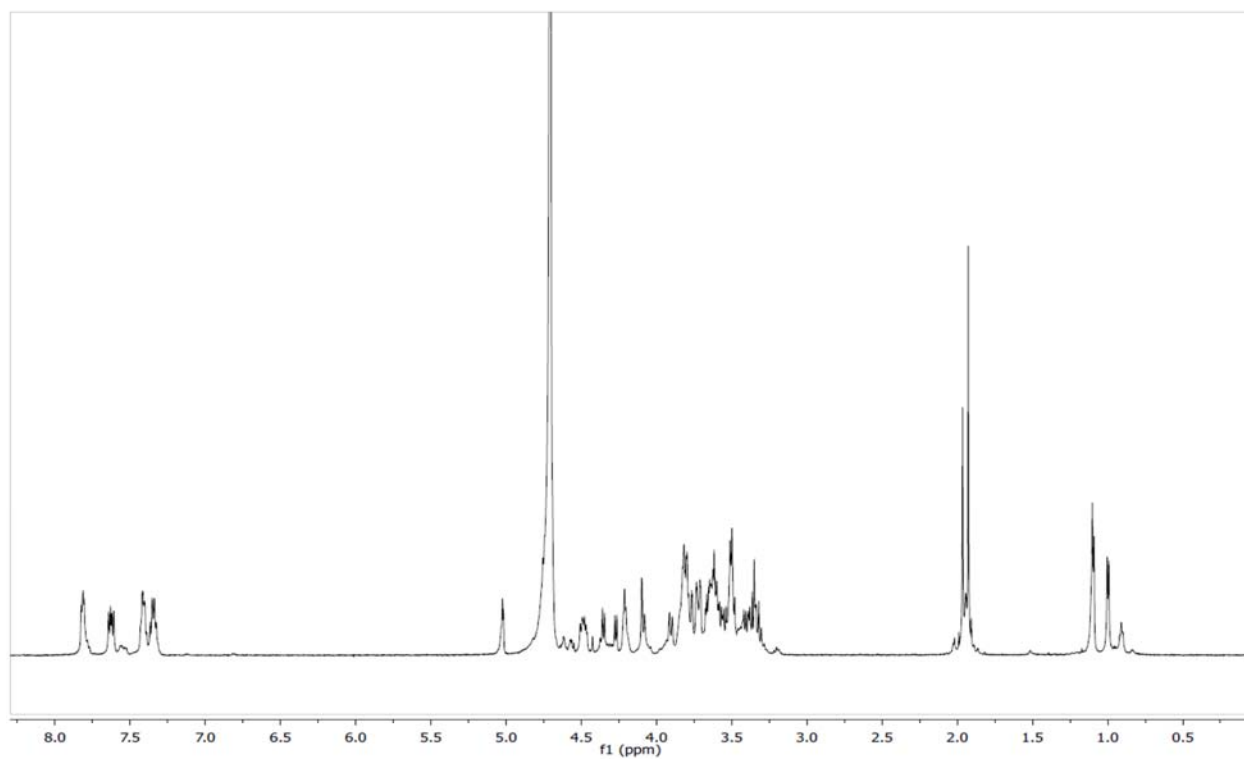

$^1\text{H}$  NMR of M305

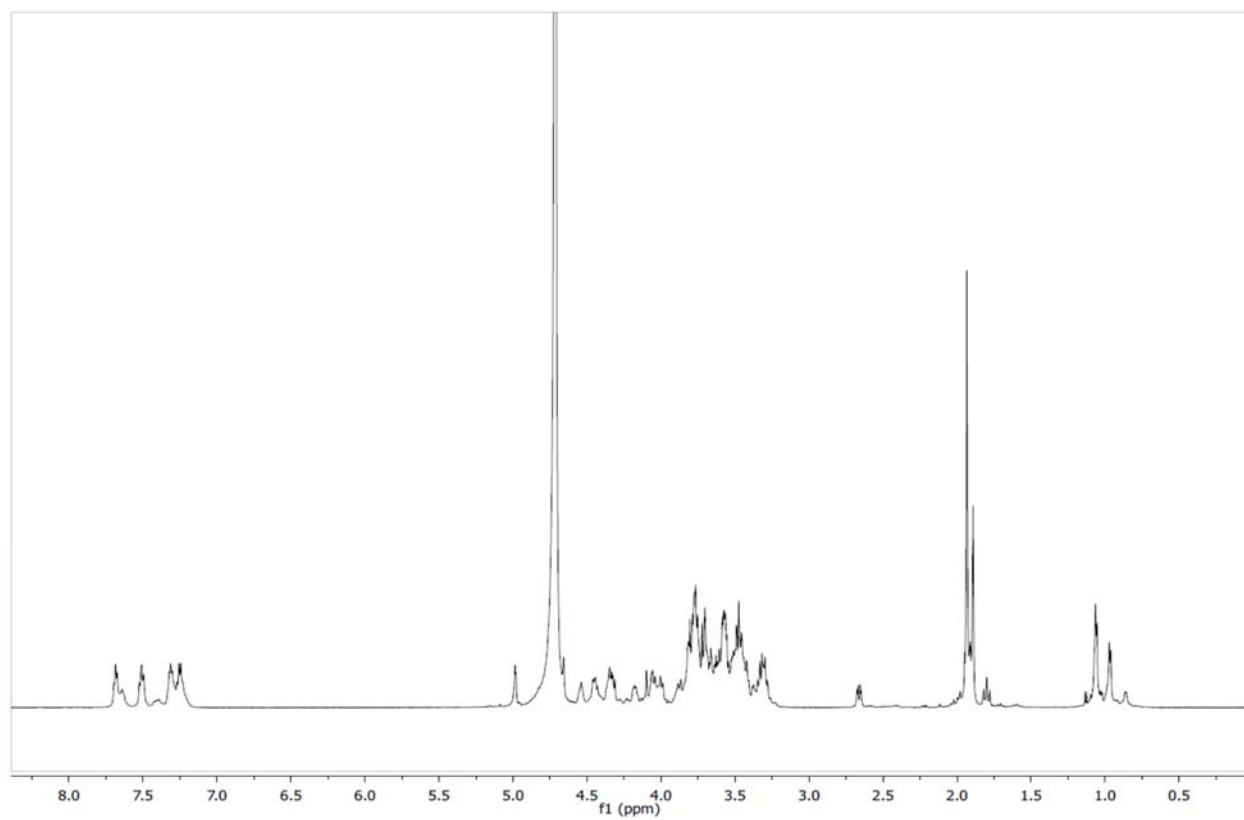

$^1\text{H}$  NMR of M312

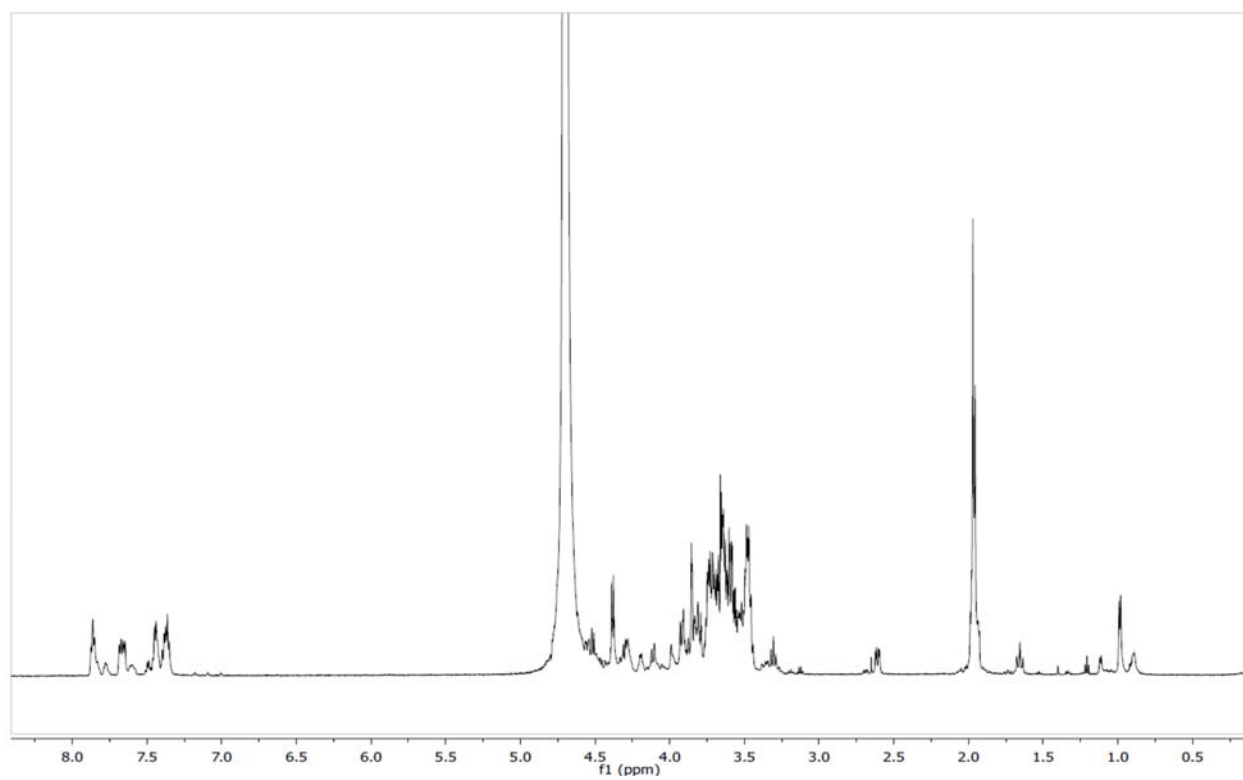

$^1\text{H}$  NMR of M313

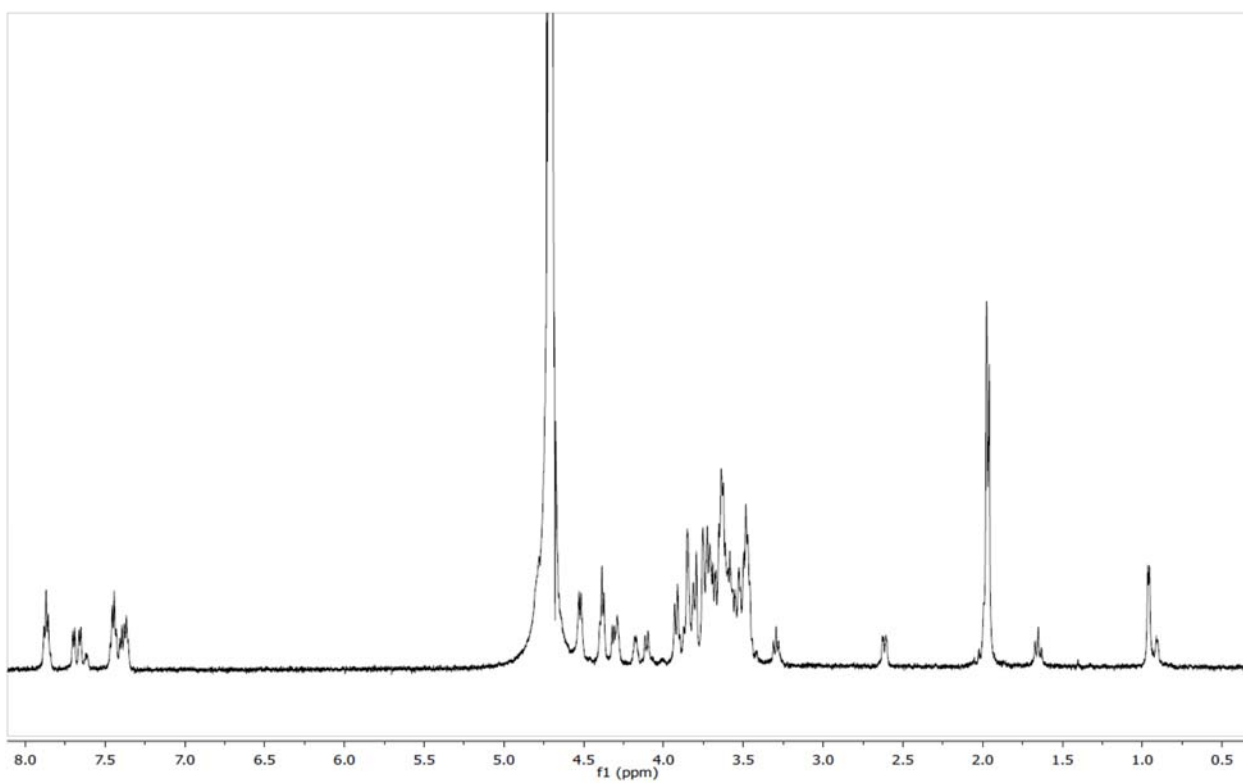

$^1\text{H}$  NMR of M314

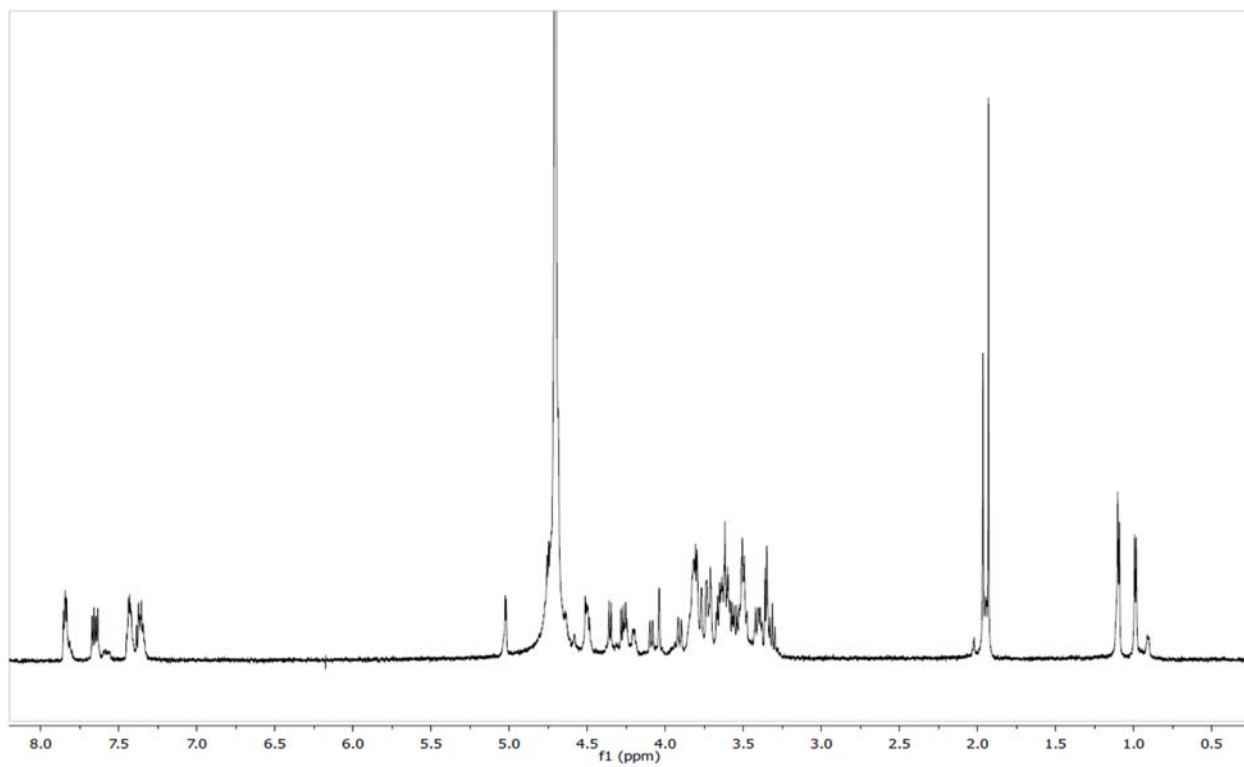

$^1\text{H}$  NMR of M315

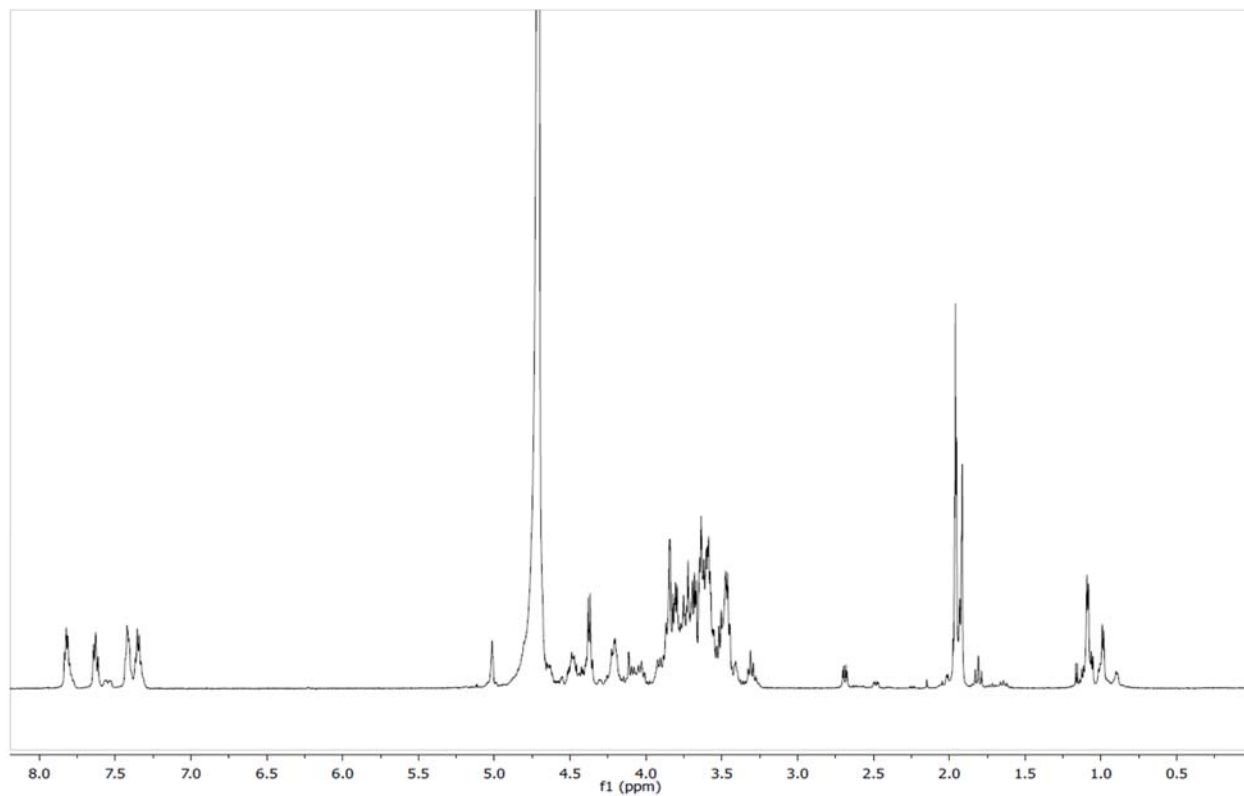

$^1\text{H}$  NMR of M323

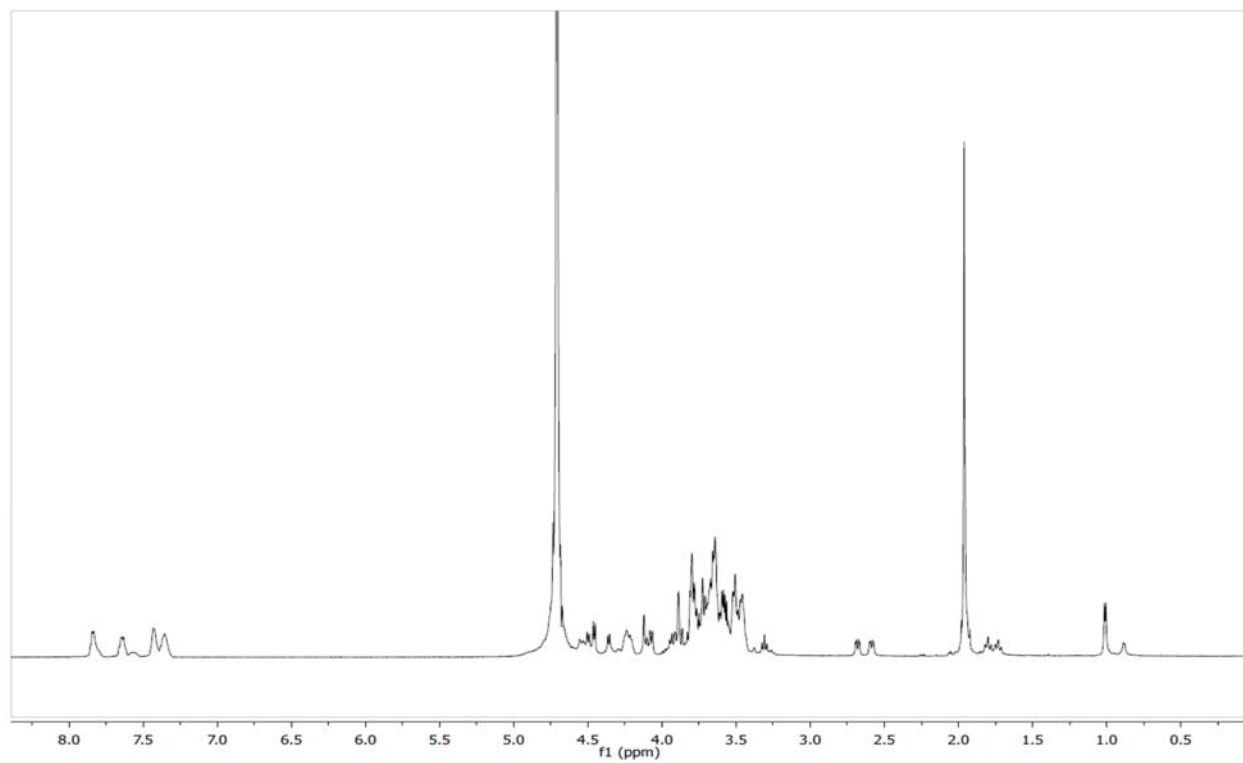

$^1\text{H}$  NMR of M324

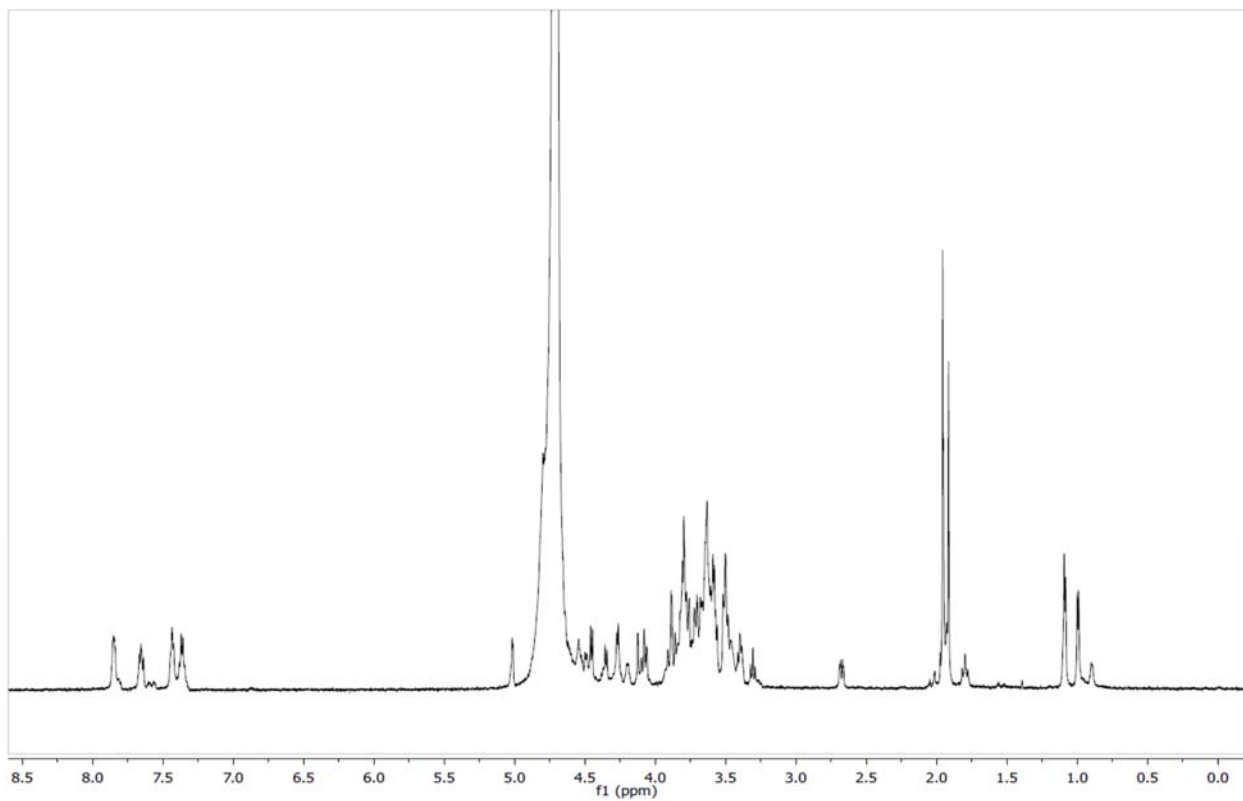

$^1\text{H}$  NMR of M325

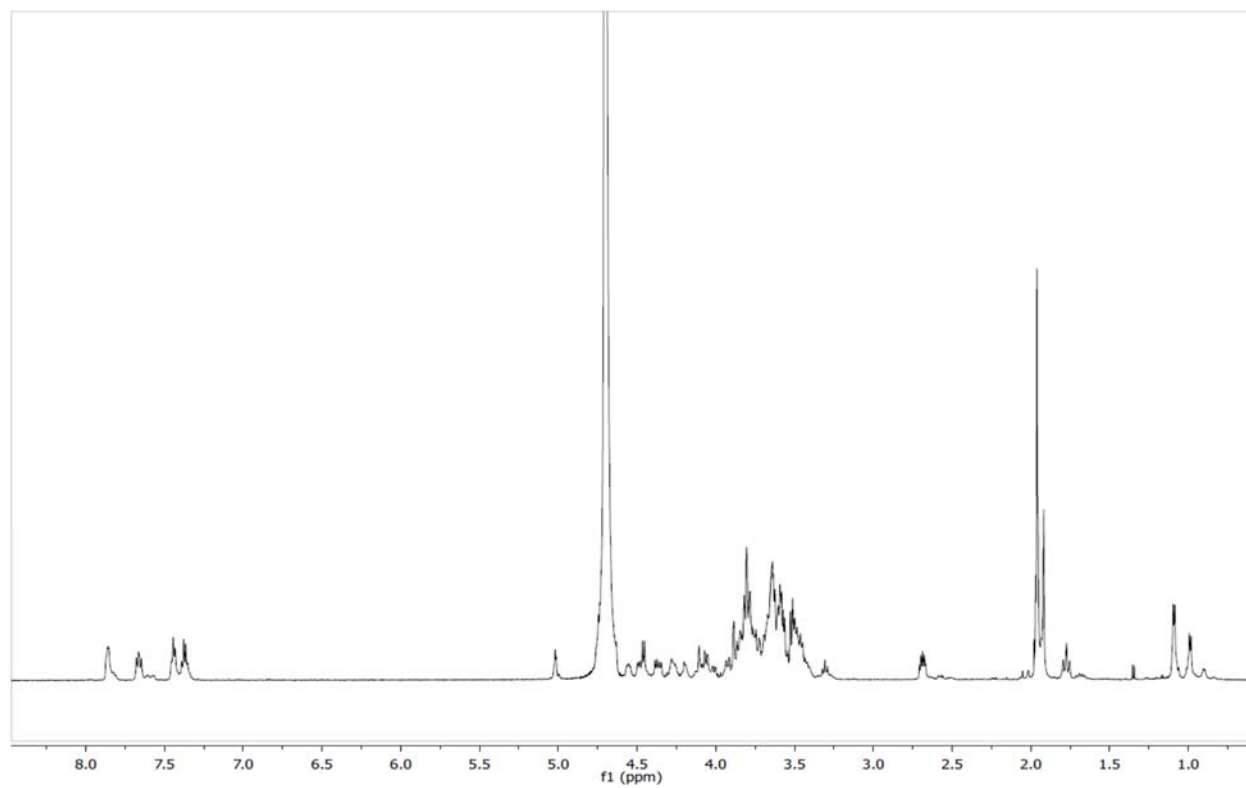

$^1\text{H}$  NMR of M334

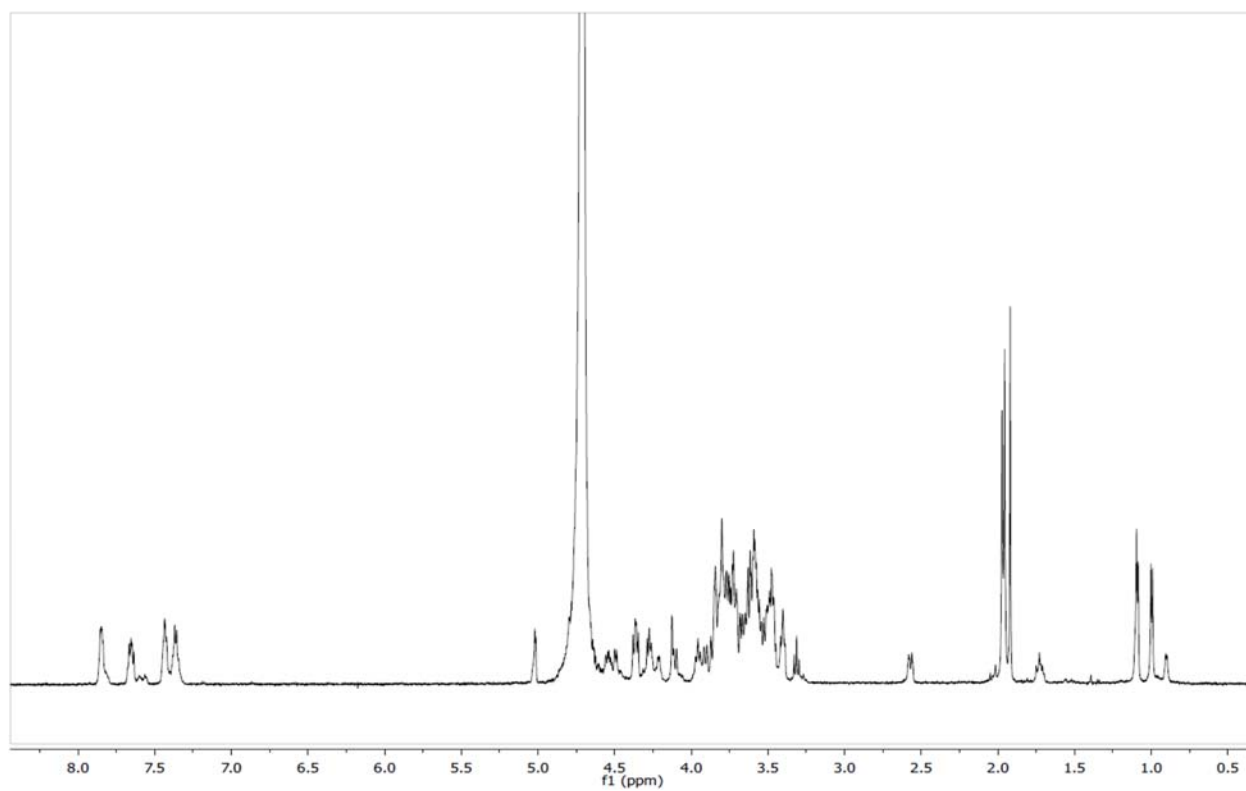

$^1\text{H}$  NMR of M335

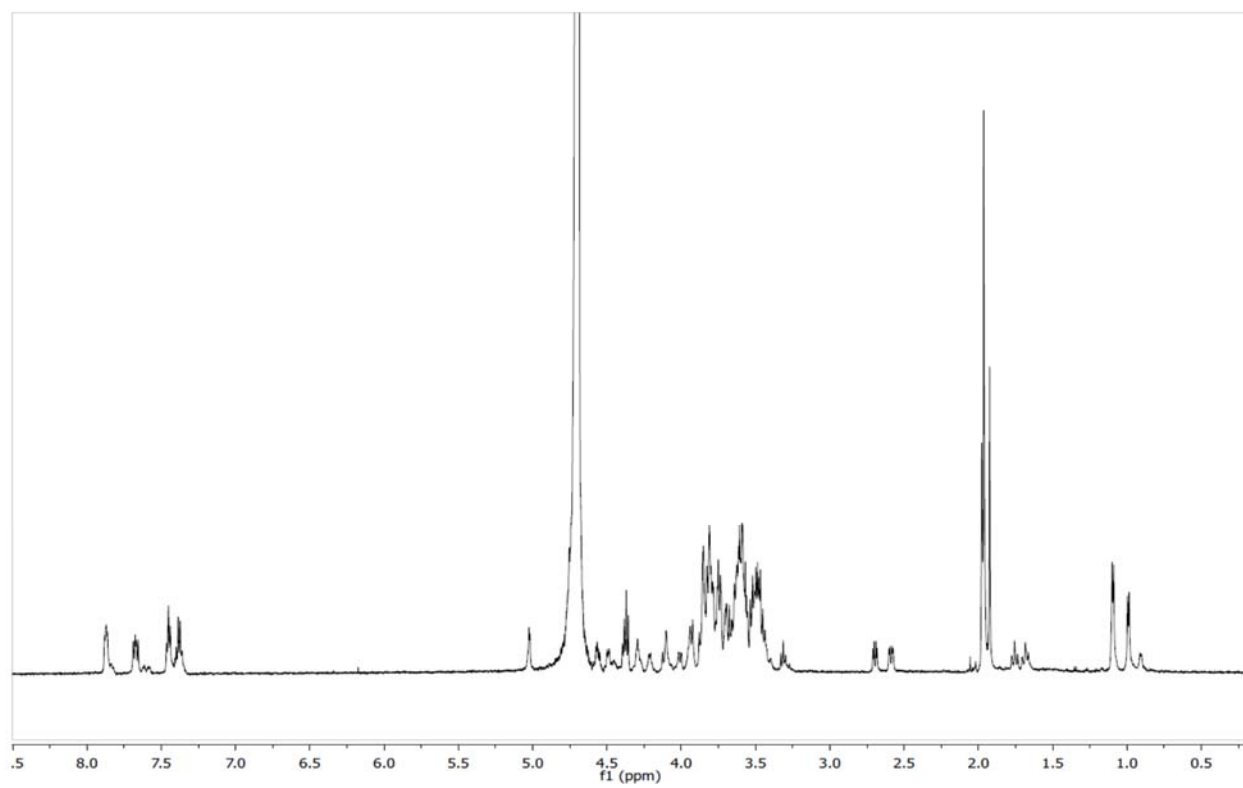

$^1\text{H}$  NMR of M345

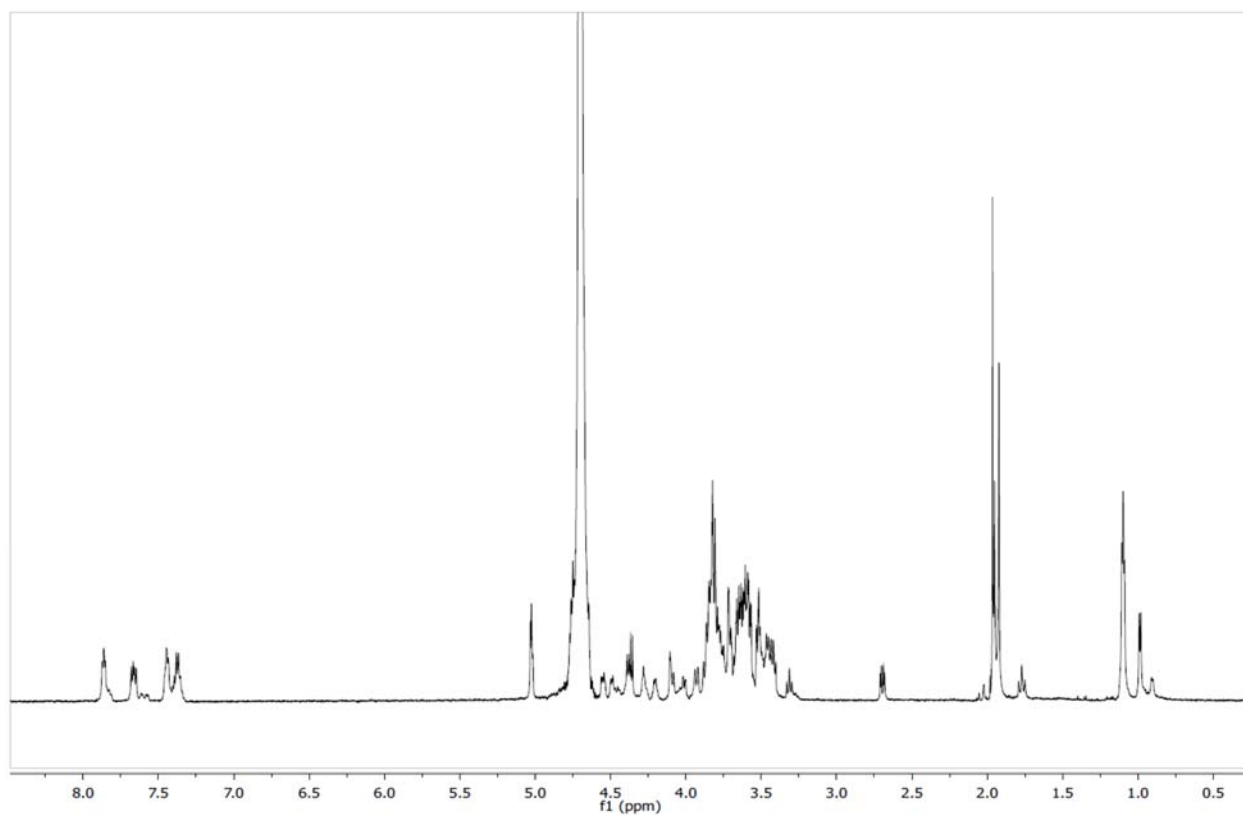

## VI. Reference

- [1] Z. Wang, Z. S. Chinoy, S. G. Ambre, W. Peng, R. McBride, R. P. de Vries, J. Glushka, J. C. Paulson, G. J. Boons, *Science* **2013**, *341*, 379-383.
- [2] F. Yan, S. Mehta, E. Eichler, W. W. Wakarchuk, M. Gilbert, M. J. Schur, D. M. Whitfield, *J Org Chem* **2003**, *68*, 2426-2431.
- [3] M. M. Muthana, J. Qu, Y. Li, L. Zhang, H. Yu, L. Ding, H. Malekan, X. Chen, *Chem Commun (Camb)* **2012**, *48*, 2728-2730.
- [4] G. Zhao, W. Guan, L. Cai, P. G. Wang, *Nat Protoc* **2010**, *5*, 636-646.
- [5] Y. Guo, J. Fang, T. Li, X. Li, C. Ma, X. Wang, P. G. Wang, L. Li, *Carbohydr Res* **2015**, *411*, 1-5.
- [6] H. Yu, H. Yu, R. Karpel, X. Chen, *Bioorg Med Chem* **2004**, *12*, 6427-6435.
- [7] G. Sugiarto, K. Lau, J. Qu, Y. Li, S. Lim, S. Mu, J. B. Ames, A. J. Fisher, X. Chen, *ACS Chem Biol* **2012**, *7*, 1232-1240.
- [8] G. Sugiarto, K. Lau, Y. Li, Z. Khedri, H. Yu, D. T. Le, X. Chen, *Mol Biosyst* **2011**, *7*, 3021-3027.
- [9] H. Yu, S. Huang, H. Chokhawala, M. Sun, H. Zheng, X. Chen, *Angew Chem Int Ed Engl* **2006**, *45*, 3938-3944.
- [10] K. Lau, V. Thon, H. Yu, L. Ding, Y. Chen, M. M. Muthana, D. Wong, R. Huang, X. Chen, *Chem Commun (Camb)* **2010**, *46*, 6066-6068.
- [11] H. Yu, Y. Li, Z. Wu, L. Li, J. Zeng, C. Zhao, Y. Wu, N. Tasnima, J. Wang, H. Liu, M. R. Gadi, W. Guan, P. G. Wang, X. Chen, *Chem Commun (Camb)* **2017**, *53*, 11012-11015.
- [12] S. Einarsson, B. Josefsson, S. Lagerkvist, *J Chromatogr A* **1983**, *282*, 609-618.
- [13] Z. Wu, Y. Liu, L. Li, X. F. Wan, H. Zhu, Y. Guo, M. Wei, W. Guan, P. G. Wang, *Org Biomol Chem* **2017**, *15*, 8946-8951.
- [14] J. Yu, O. C. Grant, C. Pett, S. Stahl, R. J. Woods, U. Westerlind, *Chemistry* **2017**, *23*, 3466-3473.
- [15] J. M. Ervasti, K. Ohlendieck, S. D. Kahl, M. G. Gaver, K. P. Campbell, *Nature* **1990**, *345*, 315-319.



## VII. Microarray Data

Microarray assay using Lectins

| Glycan | AAL      | STDEV   | RCA-I    | STDEV   | ECA      | STDEV   | Con A    | STDEV   |
|--------|----------|---------|----------|---------|----------|---------|----------|---------|
| M100   | -0.60    | 2.15    | 66.50    | 3.87    | -4.33    | 5.96    | 38589.33 | 3089.79 |
| M101   | -3.80    | 2.76    | 206.80   | 57.07   | 3377.50  | 358.19  | 445.83   | 87.57   |
| M102   | 6.20     | 2.80    | 38.00    | 7.34    | -2.50    | 6.43    | 245.67   | 82.94   |
| M102G  | 11.80    | 3.03    | 27.60    | 7.54    | -5.17    | 5.45    | 392.33   | 162.75  |
| M103   | 7.00     | 3.40    | 26.80    | 6.02    | -4.50    | 6.49    | 4856.33  | 2058.03 |
| M103G  | 6.80     | 1.74    | 39.80    | 9.10    | 5.50     | 5.54    | 1794.17  | 892.14  |
| M104   | 43846.50 | 2352.23 | 12.60    | 3.96    | 11.17    | 10.88   | 123.67   | 59.88   |
| M105   | 30774.40 | 1658.07 | 46.60    | 8.50    | 5.33     | 9.07    | 73.50    | 37.68   |
| M106   | 5.80     | 1.66    | 30.60    | 8.42    | 0.33     | 9.37    | 779.00   | 242.76  |
| M000   | 6.20     | 2.04    | 15.40    | 2.19    | 129.67   | 43.33   | 385.17   | 302.59  |
| M010   | 4.80     | 2.69    | 26129.70 | 1604.66 | 21723.50 | 2869.31 | 232.50   | 98.02   |
| M020   | 9.20     | 2.31    | 22.20    | 4.44    | 243.00   | 32.51   | 300.00   | 119.21  |
| M030   | 12.20    | 2.20    | 380.10   | 78.78   | 20.67    | 1.94    | 214.50   | 105.40  |
| M040   | 30008.80 | 838.23  | 20.40    | 6.31    | 939.33   | 169.00  | 76.33    | 28.05   |
| M050   | 19419.80 | 534.20  | 23.00    | 7.42    | -6.50    | 8.86    | 171.50   | 67.10   |
| M201   | 16.40    | 4.10    | 81.40    | 27.33   | 5408.67  | 1016.71 | 288.33   | 230.32  |
| M202   | 6.60     | 1.33    | 15.00    | 5.76    | 15.33    | 8.57    | 208.50   | 115.46  |
| M203   | 20.40    | 2.46    | 30.90    | 7.07    | -15.83   | 6.04    | 75.00    | 36.63   |
| M204   | 29119.90 | 911.55  | 19.60    | 5.73    | 99.33    | 52.27   | 172.33   | 107.19  |
| M205   | 15216.20 | 706.74  | 25.80    | 5.14    | 165.50   | 15.61   | 83.17    | 62.60   |
| M212   | 15.20    | 2.72    | 1280.10  | 97.46   | 3453.33  | 527.96  | 39.33    | 26.41   |
| M213   | 10.40    | 0.99    | 12480.70 | 1347.74 | 5220.17  | 594.38  | 215.67   | 97.29   |
| M214   | 29372.40 | 757.98  | 5783.70  | 486.87  | 6128.17  | 534.20  | 201.17   | 52.39   |
| M215   | 15444.30 | 1731.53 | 4325.50  | 579.71  | 10088.50 | 1616.05 | 246.17   | 180.51  |
| M223   | 28.20    | 2.56    | 39.40    | 4.23    | 270.67   | 47.39   | 416.17   | 237.03  |
| M224   | 13595.80 | 823.96  | 36.10    | 7.80    | 384.00   | 45.12   | 44.33    | 64.16   |
| M225   | 10597.00 | 602.63  | 18.20    | 5.78    | 148.17   | 53.37   | 146.17   | 87.03   |
| M234   | 9742.20  | 885.93  | 98.90    | 18.89   | 38.50    | 7.89    | 60.33    | 73.73   |
| M235   | 8098.10  | 266.10  | 417.40   | 61.60   | 371.17   | 93.35   | 35.50    | 51.96   |
| M245   | 19742.50 | 985.93  | 27.60    | 8.51    | 14.50    | 8.88    | 168.17   | 70.27   |
| M301   | 66.20    | 6.79    | 1965.10  | 571.47  | 4328.50  | 684.17  | 225.50   | 149.91  |
| M302   | 18.00    | 1.83    | 89.60    | 37.82   | 4.67     | 11.27   | 167.83   | 143.12  |
| M303   | 15.80    | 1.51    | 36.60    | 6.38    | 7.00     | 9.83    | 104.50   | 111.79  |
| M304   | 5411.40  | 381.44  | 30.80    | 8.95    | 105.00   | 36.20   | 227.50   | 56.02   |
| M305   | 3084.00  | 95.30   | 24.10    | 8.91    | 19.50    | 12.63   | 108.00   | 44.20   |
| M312   | 5.40     | 2.02    | 829.00   | 108.92  | 2460.67  | 494.91  | 233.17   | 146.94  |
| M313   | 15.60    | 2.59    | 2883.90  | 590.92  | 3682.17  | 491.71  | 230.33   | 80.99   |

|        |          |         |          |         |          |         |          |         |
|--------|----------|---------|----------|---------|----------|---------|----------|---------|
| M314   | 9448.80  | 1881.91 | 75.20    | 31.44   | 2151.50  | 182.50  | 359.50   | 115.25  |
| M315   | 3379.10  | 419.13  | 8.40     | 5.41    | 1848.00  | 240.68  | 147.33   | 126.87  |
| M323   | 18.60    | 3.77    | 110.00   | 31.31   | 86.33    | 27.50   | 111.33   | 78.14   |
| M324   | 3700.40  | 473.38  | 17.00    | 2.26    | 137.67   | 29.21   | 153.83   | 172.10  |
| M325   | 4253.60  | 223.48  | 26.70    | 8.86    | 15.67    | 6.23    | 119.67   | 88.29   |
| M334   | 5117.50  | 1205.63 | 22.20    | 3.24    | 85.67    | 34.88   | 113.83   | 107.47  |
| M335   | 3592.40  | 563.46  | 43.50    | 18.77   | 13.67    | 6.57    | 124.67   | 69.86   |
| M345   | 20909.40 | 1360.96 | 4.20     | 1.82    | 23.33    | 14.68   | 104.50   | 56.80   |
| NC     | 27.20    | 3.37    | 24.70    | 3.33    | 23.17    | 25.37   | 74.00    | 90.41   |
| PC1    | 25869.00 | 2541.00 | 29592.90 | 384.17  | 35474.67 | 1490.64 | 27411.67 | 2617.91 |
| PC2    | 32.05    | 20.13   | 2.00     | 10.23   | 1523.67  | 157.12  | 125.37   | 23.05   |
| Marker | 14695.26 | 3210.15 | 15246.26 | 2104.16 | 29284.83 | 1215.30 | 31535.33 | 2122.57 |

### Microarray assay using antibodies

| Anti-CD155 | STDEV   | IIH6   | STDEV |
|------------|---------|--------|-------|
| 75.50      | 14.45   | 13.40  | 16.22 |
| 30.80      | 8.14    | 28.40  | 16.12 |
| 20.60      | 3.20    | -28.40 | 11.97 |
| 28.80      | 9.45    | 36.40  | 22.06 |
| 51.60      | 8.60    | 11.00  | 18.56 |
| 28.20      | 10.05   | 28.80  | 15.49 |
| 18.40      | 2.33    | 42.20  | 29.33 |
| 60.80      | 7.61    | 8.00   | 14.53 |
| 45.40      | 10.00   | 39.00  | 10.03 |
| 28.20      | 5.18    | 24.00  | 10.40 |
| 2.20       | 2.77    | -5.60  | 18.28 |
| 20.80      | 5.86    | 97.20  | 5.09  |
| 62.70      | 11.89   | 95.20  | 20.95 |
| 77.30      | 13.50   | 41.00  | 12.36 |
| 22442.00   | 2410.34 | 31.80  | 3.40  |
| 31.60      | 8.10    | 10.60  | 9.21  |
| 12.60      | 2.16    | 19.80  | 6.88  |
| 60.60      | 8.62    | 40.00  | 6.88  |
| 45.40      | 12.05   | 49.60  | 3.86  |
| 20.20      | 4.16    | 70.80  | 2.18  |
| 12.00      | 3.32    | 21.40  | 15.27 |
| 6.80       | 0.92    | 22.40  | 13.07 |
| 51.80      | 9.20    | 36.00  | 10.31 |
| 61.20      | 11.69   | -36.80 | 21.22 |

|          |         |  |          |         |
|----------|---------|--|----------|---------|
| 55.40    | 10.01   |  | -11.80   | 9.26    |
| 10.40    | 0.90    |  | 68.20    | 12.92   |
| 38.40    | 8.51    |  | 70.40    | 12.16   |
| 31.50    | 9.17    |  | 5.40     | 1.43    |
| 29.90    | 7.01    |  | 16.60    | 4.45    |
| 54.60    | 12.17   |  | 212.80   | 9.37    |
| 29.60    | 8.92    |  | 134.30   | 11.22   |
| 19.80    | 2.77    |  | -4.60    | 9.01    |
| 81.10    | 7.77    |  | 40.20    | 13.49   |
| 52.20    | 11.04   |  | 107.20   | 11.60   |
| 18647.50 | 1142.41 |  | 52.00    | 15.78   |
| 43.20    | 8.10    |  | 112.40   | 14.80   |
| 19.40    | 3.05    |  | 121.20   | 14.98   |
| 96.36    | 15.37   |  | 72.80    | 15.74   |
| 12649.70 | 2040.37 |  | 159.00   | 14.23   |
| 29.80    | 9.02    |  | 141.80   | 10.11   |
| 38.80    | 9.77    |  | 72.40    | 15.96   |
| 13917.20 | 2398.72 |  | 93.20    | 30.69   |
| 8.40     | 0.39    |  | 107.40   | 16.96   |
| 2716.30  | 140.60  |  | 42.60    | 9.66    |
| 6877.80  | 670.14  |  | 133.60   | 28.27   |
| 34.70    | 5.28    |  | 374.80   | 26.81   |
| 16.60    | 3.49    |  | 8.60     | 14.52   |
| 36.89    | 23.00   |  | 56.32    | 12.46   |
| 17562.24 | 2332.56 |  | 18253.27 | 3326.24 |

### Microarray assay using antisera

| Glycan | 26559 Pre-immune |        | 26559 final bleed |        | 26560 Pre-Immune |        | 26560 final bleed |         |
|--------|------------------|--------|-------------------|--------|------------------|--------|-------------------|---------|
|        | Pre-immune       | SDTEV  | final bleed       | SDTEV  | Pre-Immune       | SDTEV  | final bleed       | SDTEV   |
| M100   | 1010.50          | 160.84 | 2927.50           | 839.73 | 686.00           | 278.29 | 8663.67           | 1212.61 |
| M101   | 412.72           | 34.71  | 576.17            | 186.61 | 368.33           | 102.96 | 398.67            | 40.85   |
| M102   | 175.89           | 22.15  | 177.50            | 48.46  | 218.00           | 65.53  | 364.25            | 53.21   |
| M102G  | 185.56           | 20.92  | 206.50            | 56.07  | 129.83           | 62.26  | 256.17            | 48.73   |
| M103   | 182.11           | 16.11  | 98.17             | 44.03  | 98.50            | 53.77  | 192.83            | 76.81   |
| M103G  | 256.94           | 61.60  | 274.50            | 105.82 | 216.33           | 93.97  | 227.33            | 56.52   |
| M104   | 949.33           | 163.94 | 1716.83           | 381.91 | 1063.33          | 293.60 | 712.08            | 127.72  |
| M105   | 200.50           | 40.33  | 297.83            | 91.91  | 150.83           | 95.89  | 319.92            | 89.50   |
| M106   | 2774.89          | 383.53 | 2563.33           | 374.84 | 3150.50          | 511.36 | 4902.17           | 870.92  |
| M000   | 809.17           | 65.64  | 3874.50           | 400.15 | 999.67           | 231.17 | 9278.08           | 993.38  |
| M010   | 397.00           | 33.98  | 348.17            | 176.41 | 312.50           | 138.60 | 614.75            | 71.65   |

|        |          |        |          |         |          |         |          |         |
|--------|----------|--------|----------|---------|----------|---------|----------|---------|
| M020   | 182.56   | 25.11  | 189.17   | 107.16  | 98.33    | 72.88   | 272.83   | 71.57   |
| M030   | 209.72   | 33.86  | 239.00   | 101.84  | 187.50   | 76.98   | 277.67   | 101.31  |
| M040   | 2128.39  | 391.24 | 2246.33  | 229.15  | 1583.00  | 464.69  | 698.50   | 224.01  |
| M050   | 254.83   | 41.17  | 257.17   | 160.91  | 157.50   | 19.88   | 312.50   | 51.11   |
| M201   | 452.72   | 52.69  | 7193.67  | 680.67  | 678.33   | 207.29  | 9913.17  | 821.91  |
| M202   | 275.44   | 27.39  | 7333.17  | 1293.18 | 299.00   | 83.62   | 9767.75  | 1128.59 |
| M203   | 391.11   | 17.36  | 6436.33  | 686.92  | 329.00   | 75.67   | 8361.50  | 674.47  |
| M204   | 560.56   | 68.62  | 5915.67  | 466.22  | 836.00   | 232.76  | 9023.50  | 1452.68 |
| M205   | 617.67   | 72.40  | 5176.50  | 546.60  | 333.50   | 70.74   | 7084.75  | 515.67  |
| M212   | 352.39   | 17.49  | 346.50   | 141.75  | 211.50   | 73.31   | 433.83   | 34.25   |
| M213   | 296.28   | 26.03  | 457.67   | 67.96   | 225.83   | 107.85  | 310.75   | 42.10   |
| M214   | 475.11   | 79.59  | 1302.00  | 277.23  | 723.83   | 204.32  | 495.92   | 138.73  |
| M215   | 391.78   | 54.13  | 482.50   | 87.85   | 309.50   | 55.14   | 232.58   | 62.31   |
| M223   | 403.22   | 27.58  | 509.17   | 129.57  | 210.33   | 46.53   | 196.00   | 102.77  |
| M224   | 480.61   | 25.22  | 760.83   | 224.88  | 347.83   | 77.22   | 432.00   | 79.59   |
| M225   | 304.33   | 33.02  | 390.67   | 160.33  | 271.00   | 64.43   | 423.33   | 100.46  |
| M234   | 279.56   | 21.45  | 690.00   | 147.30  | 503.50   | 109.39  | 446.17   | 65.53   |
| M235   | 361.94   | 19.19  | 510.83   | 129.64  | 256.67   | 89.91   | 458.42   | 97.35   |
| M245   | 626.67   | 86.75  | 569.67   | 115.16  | 569.33   | 153.76  | 461.75   | 136.74  |
| M301   | 742.33   | 104.16 | 1923.83  | 580.28  | 598.33   | 277.21  | 13042.42 | 2218.76 |
| M302   | 292.28   | 40.43  | 1006.00  | 167.66  | 391.17   | 79.99   | 5847.50  | 573.02  |
| M303   | 341.00   | 45.43  | 1112.00  | 218.63  | 414.17   | 159.72  | 4121.50  | 834.74  |
| M304   | 520.67   | 30.33  | 1504.67  | 277.75  | 572.17   | 183.05  | 7448.75  | 467.74  |
| M305   | 375.83   | 65.87  | 594.50   | 125.38  | 237.00   | 58.21   | 5323.92  | 1035.37 |
| M312   | 328.50   | 25.74  | 634.17   | 132.92  | 217.00   | 83.70   | 288.33   | 75.52   |
| M313   | 345.33   | 27.77  | 596.17   | 206.69  | 315.83   | 78.52   | 414.08   | 93.22   |
| M314   | 345.89   | 36.03  | 736.33   | 236.41  | 269.67   | 98.58   | 546.33   | 54.92   |
| M315   | 331.72   | 28.70  | 522.83   | 87.44   | 300.50   | 160.57  | 410.42   | 105.46  |
| M323   | 456.89   | 34.34  | 422.83   | 209.41  | 241.50   | 27.25   | 501.50   | 81.72   |
| M324   | 591.11   | 22.55  | 1444.50  | 290.68  | 869.00   | 213.42  | 647.17   | 91.15   |
| M325   | 294.06   | 36.48  | 548.50   | 254.14  | 286.67   | 47.79   | 364.50   | 91.68   |
| M334   | 390.33   | 33.13  | 854.67   | 189.55  | 1240.50  | 353.16  | 428.50   | 98.59   |
| M335   | 353.44   | 43.41  | 583.00   | 152.61  | 268.00   | 88.15   | 433.00   | 34.53   |
| M345   | 436.78   | 50.18  | 546.83   | 108.41  | 335.33   | 61.25   | 477.25   | 90.52   |
| NC     | 533.61   | 97.57  | 1312.67  | 485.88  | 488.33   | 91.15   | 731.17   | 55.22   |
| PC1    | 489.39   | 90.10  | 1697.50  | 554.79  | 297.33   | 149.36  | 763.58   | 54.34   |
| PC2    | 16988.11 | 615.76 | 16789.17 | 1300.35 | 29767.83 | 2581.69 | 28637.75 | 434.17  |
| MARKER | 8066.89  | 36.81  | 7485.17  | 110.24  | 12823.83 | 121.19  | 13982.33 | 71.52   |
